# Supplementary material for: Comorbidities, complications and mortality in people of South Asian ethnicity with type 1 diabetes compared with other ethnic groups: a systematic review
Source: PubMed Central journal article supplement — BMJ Open. 2017 Jul 13;7(7):e015005. doi: 10.1136/bmjopen-2016-015005 (PMC5734407; doi:10.1136/bmjopen-2016-015005), 2017-07-13
Supplement: bmjopen-2016-015005.draft_revisions.pdf [file bmjopen-2016-015005.draft_revisions.pdf]

# BMJ Open

## Ethnic differences in risk factors, complications and mortality in people of South Asian ethnicity with type 1 diabetes: a systematic review

|                                 |                                                                                                                                                                                                                                                                                                                                                       |
|---------------------------------|-------------------------------------------------------------------------------------------------------------------------------------------------------------------------------------------------------------------------------------------------------------------------------------------------------------------------------------------------------|
| Journal:                        | <i>BMJ Open</i>                                                                                                                                                                                                                                                                                                                                       |
| Manuscript ID                   | bmjopen-2016-015005                                                                                                                                                                                                                                                                                                                                   |
| Article Type:                   | Research                                                                                                                                                                                                                                                                                                                                              |
| Date Submitted by the Author:   | 03-Nov-2016                                                                                                                                                                                                                                                                                                                                           |
| Complete List of Authors:       | Sarwar, Komil; University of Birmingham, Cliff, Phoebe; University of Birmingham Saravanan, Ponnusamy; University of Warwick Warwick Medical School, ; George Eliot Hospital, Khunti, Kamlesh; University of Leicester, Department of Health Sciences Nirantharakumar, Krishnarajah; University of Birmingham Narendran, P; University of Birmingham, |
| <b>Primary Subject Heading</b>: | Diabetes and endocrinology                                                                                                                                                                                                                                                                                                                            |
| Secondary Subject Heading:      | Epidemiology                                                                                                                                                                                                                                                                                                                                          |
| Keywords:                       | General diabetes < DIABETES & ENDOCRINOLOGY, EPIDEMIOLOGY, Diabetic nephropathy & vascular disease < DIABETES & ENDOCRINOLOGY, Diabetic neuropathy < DIABETES & ENDOCRINOLOGY, Diabetic retinopathy < DIABETES & ENDOCRINOLOGY                                                                                                                        |
|                                 |                                                                                                                                                                                                                                                                                                                                                       |

SCHOLARONE™  
Manuscripts

## Title Page

**Title of Paper:** Ethnic differences in risk factors, complications and mortality in people of South Asian ethnicity with type 1 diabetes: a systematic review

**Authors:** Komil N Sarwar (Foundation Doctor)<sup>1</sup>, Phoebe Cliff (Foundation Doctor)<sup>1</sup>, Ponnusamy Saravanan (Associate Clinical Professor)<sup>2</sup>, Kamlesh Khunti (Professor of Primary Care Diabetes and Vascular Medicine)<sup>3</sup>, Krishnarajah Nirantharakumar (Senior Clinical Lecturer)<sup>1</sup>, Parth Narendran (Reader in Diabetes Medicine)<sup>1</sup>

**Institution(s) of origin:** University of Birmingham, Edgbaston, Birmingham, B152TT<sup>1</sup>  
University of Warwick, Coventry, CV4 7AL<sup>2</sup>  
University of Leicester, University Road, Leicester LE1 7RH<sup>3</sup>

**Corresponding author:** Dr Krishnarajah Nirantharakumar

Public Health, Epidemiology and Biostatistics, University of Birmingham, Edgbaston Birmingham, B15 2TT, UK

Telephone: 44 (0)121 414 8344

Fax: +44 (0)121 414 6217

Email: k.nirantharan@bham.ac.uk

**Conflicts of Interest:** KK (Co-Chair) PS and PN are members of the South Asian Health Foundation Working group on Diabetes.

### **What is already known in this subject**

- In contrast to type 2 diabetes, very little is known of the effect of South Asian ethnicity on the natural history of type 1 diabetes
- The majority of studies looking at ethnic disparities in type 1 diabetes have been conducted in the United States of America and thus their primary focus was on the black and Hispanic ethnic groups.
- South Asians comprise 20% of the global population and 7% of the UK population and there is a great need to understand the effect of South Asian ethnicity on the natural history of type 1 diabetes

### **What this study adds**

- Our review demonstrates South Asians with type 1 diabetes have a higher mortality than white Europeans
- South Asians have poorer HbA1c control than white Europeans but better than people of African and African-Caribbean (AC) origin
- South Asians have similar rates of retinopathy and nephropathy to white Europeans but lower rate of nephropathy than people of AC origin

1  
2  
3 **Ethnic differences in risk factors, complications and mortality in people of South Asian ethnicity**  
4 **with type 1 diabetes: a systematic review**  
5

6 Komil N Sarwar, Phoebe Cliff, Ponnusamy Saravanan, Kamlesh Khunti, Krishnarajah  
7 Nirantharakumar, Parth Narendran  
8

9 **Abstract**  
10

11 **Objective.** The epidemiology of Type 1 Diabetes (T1DM) in South Asians (SA) is poorly understood. In  
12 contrast, we know that Type 2 diabetes (T2DM) is 2-3 times more common in SAs than in the White  
13 European (WE) population. Furthermore, SA with T2DM develop the condition 5-10 years earlier  
14 than WE, have worse outcomes and die at a younger age. We aimed to conduct a systematic review  
15 to determining differences in risk factors, microvascular and macrovascular complications, and  
16 mortality in SA compared to other ethnic groups in patients with T1DM.  
17  
18

19 **Design.** Systematic Review  
20

21 **Data Sources.** T1DM was searched for in SA ethnic groups in Medline and Embase.11 studies were  
22 included.  
23

24 **Results.** Our review demonstrates SAs (and particularly female SAs) with T1DM have higher  
25 mortality compared to WE and suggests this increased mortality is contributed to by excess  
26 cardiovascular disease. SAs also have significantly higher HbA1c than WE. Despite this higher HbA1c,  
27 rates of microvascular disease appeared similar to the WE population and some (neuropathy) even  
28 lower. SAs have lower levels of HDL cholesterol, and smoking rates were half that of WE. Compared  
29 to AC, SA had lower levels of microalbuminuria, lower HbA1c, lower systolic blood pressure and  
30 higher HDL levels. There were no statistically significant differences between these two ethnic  
31 groups in the remaining outcomes: cardiovascular disease, retinopathy, neuropathy and BMI. We  
32 also demonstrate that SA have higher HbA1c levels than both Malay and Chinese and higher waist-  
33 hip ratio and lower HDL levels compared to Chinese only.  
34  
35  
36

37 **Conclusion.** Our analysis highlights ethnic disparity in macrovascular outcomes that is so evident for  
38 T2DM may also be present for SA patients with T1DM. Secondly, we highlight a need for a large,  
39 ideally prospective, cohort study exploring the effect of ethnicity in a uniform healthcare setting.  
40  
41  
42  
43  
44  
45  
46  
47  
48  
49  
50  
51  
52  
53  
54  
55  
56  
57  
58  
59  
60

### **Strengths**

- The strengths of this analysis are its comprehensive search strategy with clearly defined population and outcomes.
- Our search strategy incorporated both full-length papers as well as abstracts, included all languages and had a secondary search strategy to ensure we did not miss any relevant papers.
- We compared the SA group, the largest ethnic group globally with all other indigenous ethnic groups.

### **Weaknesses**

- The quality of the studies were poor with the majority of studies being retrospective observational or cross-sectional.
- It was also not possible to undertake a meta-analysis of the combined studies because the results were heterogeneous in nature.
- Furthermore, the methodology of how outcomes were assessed was not consistently reported, and the numbers of SA in each study were small.

## **Background**

The epidemiology of Type 1 Diabetes (T1DM) in South Asians (SA) is poorly understood. It's effects on metabolic control, diabetic complication rate, or indeed the underlying pathogenesis has yet to be explored. In contrast, we know that Type 2 Diabetes (T2DM) is 2-3 times more common in SAs than in the White European (WE) population in the United Kingdom<sup>1</sup>, and up to three times more common among people of African and African-Caribbean (AC) origin<sup>2</sup>. Furthermore, SA with T2DM develop the condition 5-10 years earlier than WE, have increased prevalence of diabetic complications at presentation, worse outcomes, and die at a younger age<sup>1,3</sup>. These differences have not been explored in people with T1DM.

A study by Willi et al<sup>4</sup> suggested that there were ethnic disparities in the outcomes of children with T1DM with black participants having higher mean HbA1c levels, more diabetic ketoacidosis and severe hypoglycaemic events compared to white or Hispanic participants. A recent systematic review<sup>5</sup> identified 16 studies in the current literature that showed racial/ethnic minority youth with T1DM having higher HbA1c compared to Caucasian youth. As the majority of these studies are conducted in the United States of America, their primary focus was on the black and Hispanic ethnic groups and youth with T1DM.

SAs comprise 20% of the global population<sup>1</sup> and 7% of the UK population<sup>7</sup>. Furthermore, the incidence of T1DM appears to be similar in SA as in the background population<sup>7</sup>. Therefore, there is a need to understand the effect of ethnicity on the natural history of T1DM. The aim of this systematic review is to explore the association of SA ethnicity on risk factors, microvascular and macrovascular complications, and mortality compared to other ethnic groups in people with T1DM.

## **Methods**

Terms indicative of T1DM and SA were searched for in MEDLINE (Ovid) and EMBASE using keywords and free text. Full length papers and abstracts were included in the search from 1946 to February 2016. The search was not limited to a particular language, study design or outcome and the papers did not have to be peer-reviewed. A secondary search strategy involved reading bibliographies of the included studies and contacting authors of the included studies and committee members of the South Asian Health Foundation (<http://www.sahf.org.uk>) enquiring about additional studies or on-going research. Further information pertaining to the search strategy can be found in Appendix 1.

The inclusion criteria were based on the Population, Intervention, Comparator and Outcome (PICO) framework. The population was SA with T1DM including both children and adults. A clinical diagnosis was accepted for the definition of T1DM. We defined SA ethnicity as persons originating from the following countries: India, Pakistan, Sri Lanka, Bangladesh, Nepal, Bhutan and the Maldives, and compared their risk factors, complications and mortality to persons of any other ethnicity not classified as SA. The outcomes investigated were body mass index, systolic and diastolic blood pressure, HbA1c, lipid profile and smoking status (risk factors); retinopathy, neuropathy and nephropathy (microvascular complications); ischaemic heart disease and cerebrovascular disease (macrovascular complications); and cause-specific and all-cause mortality.

Identified titles and abstracts were reviewed independently by two researchers (KS and PC). All studies that were deemed suitable for potential inclusion were then further examined in detail by

1  
2  
3 the two researchers independently to create the final list of included studies. Where there were  
4 discrepancies between the two researchers (KS and PC) this was resolved by discussion. Quality  
5 assessment and data extraction was performed by KS and then checked by PC to identify any missing  
6 information (Appendix 2). The Newcastle-Ottawa Quality Assessment Scale for observational studies  
7 was used for quality assessment<sup>8</sup>.  
8  
9

10 We were not able to perform a meta-analysis because the studies were not comparable by  
11 outcomes measured, were of poor quality, and heterogeneous in the way South Asian ethnicity was  
12 defined. The results have been analysed as a narrative and presented as tabulations with textual  
13 description by each risk factor and outcome.  
14

15 **Patient Involvement:** Patients were not involved.  
16

### 17 **Results**

18  
19 The initial search identified 4,722 papers. After removing duplicates (1,194), the remaining 3,528  
20 titles and abstracts were screened. After excluding 3,223 papers in this initial screening process, 305  
21 full text articles were assessed in detail for potential inclusion into the analysis. Ten papers met the  
22 inclusion criteria for review. A secondary search using the bibliographies of included studies yielded  
23 an additional 1 paper (Figure 1). A total of 11 studies were therefore included: 6 studies were from  
24 the United Kingdom, 4 from South Africa and 1 from Malaysia. Nine of the papers were full length  
25 papers and 2 were abstracts. Of the included articles, 1 was a prospective cohort study<sup>9</sup>, 3 were  
26 retrospective analysis of observational data<sup>11, 14-15</sup>. The remaining 7 studies were cross-sectional  
27 analyses<sup>10, 12-13, 16-19</sup>. The results are summarised in Table 1 and Table 2.  
28  
29  
30  
31  
32  
33  
34  
35  
36  
37  
38  
39  
40  
41  
42  
43  
44  
45  
46  
47  
48  
49  
50  
51  
52  
53  
54  
55  
56  
57  
58  
59  
60

Figure 1: Flowchart demonstrating Study Selection

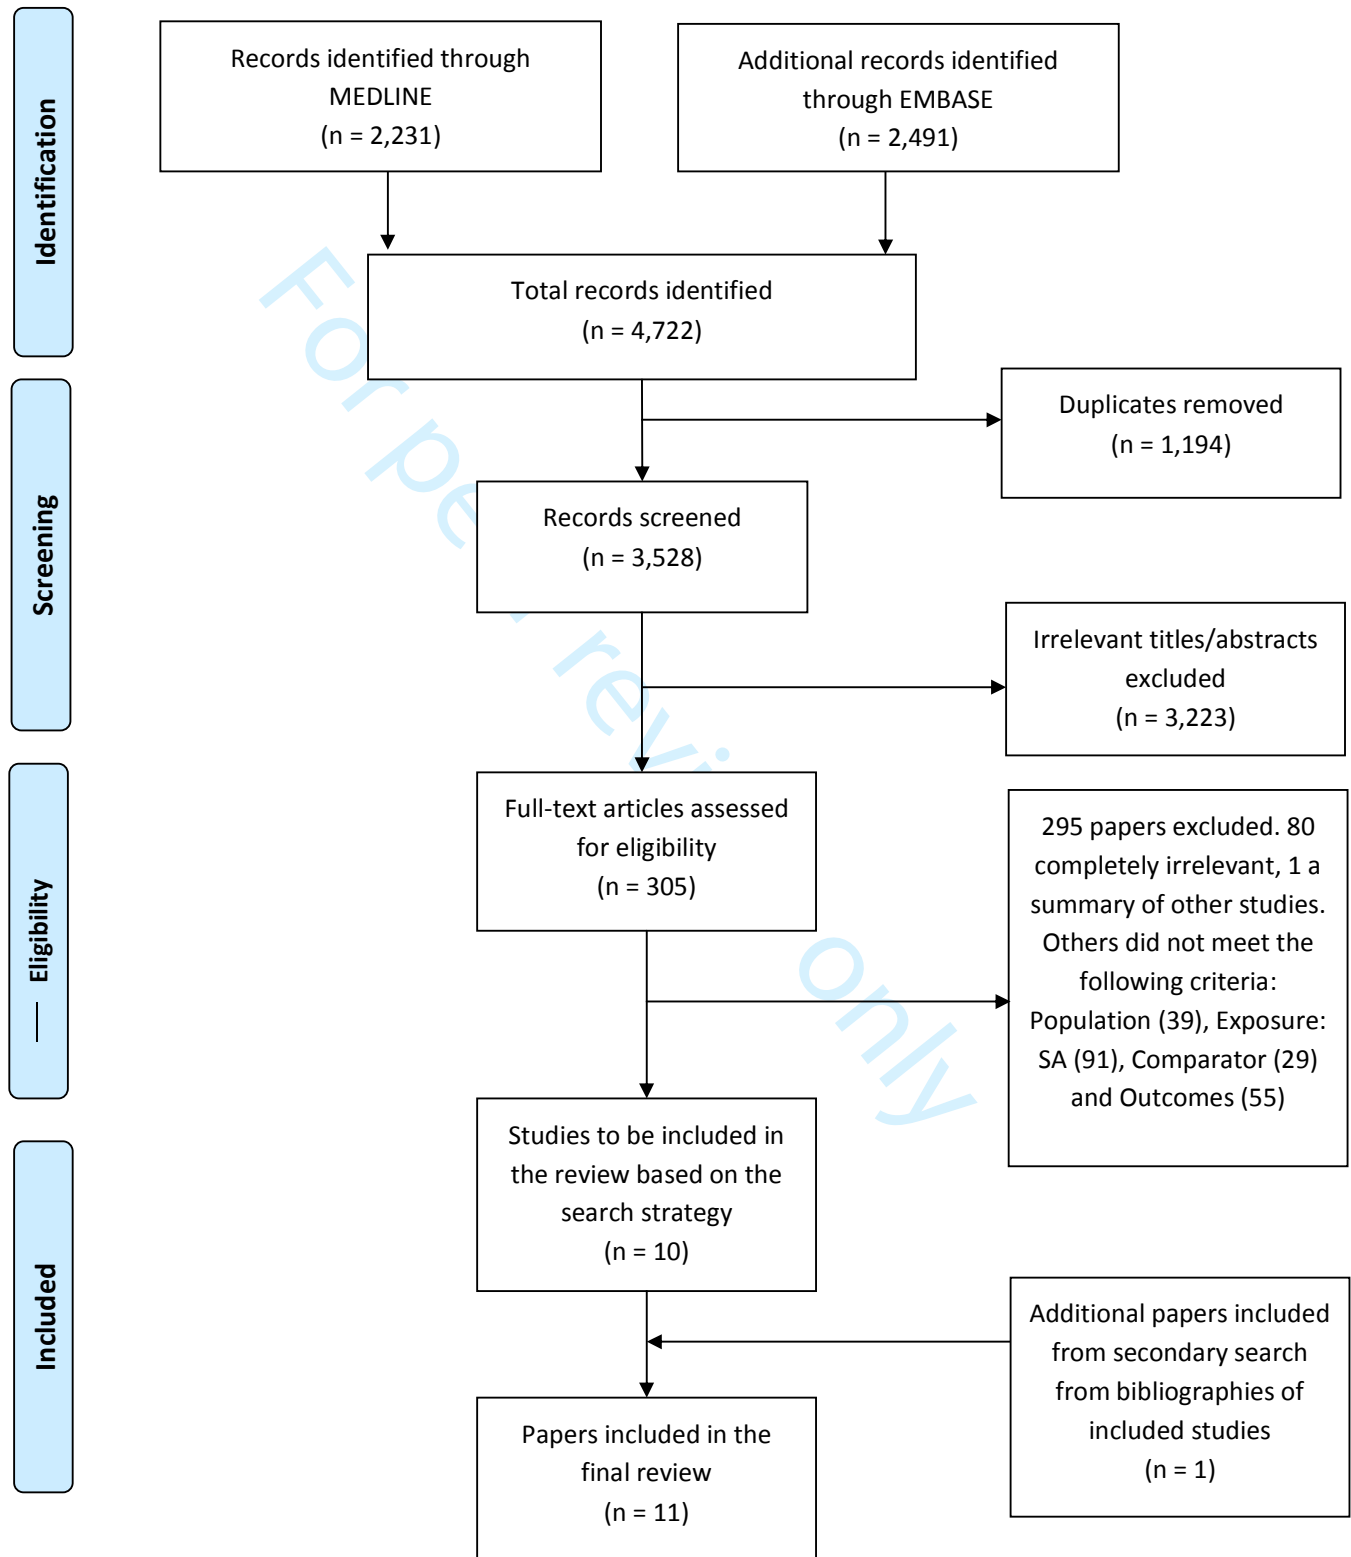

**Table 1:** Data extraction of studies included in systematic review

| Study & year published                   | Country               | Design                      | Method and Description                                                                                                                                                                                                                                                                                                                                                                                                                                                                                                  | Number of Participants & Ethnic Group                    | Age description                                                | Duration of Study | Key Outcomes                                                                                                                                                                                                                                                                                                                                                                                                                                                                                                                                                                                                                                                                                                                                                                                                                                                                                                                                                                                                                                                                                                                                                                                                                                                                                                                                                                                                                                                                                                                                                                                                                                       |  |                       |                           |         |                                        |  |  |  |   |            |            |       |   |           |            |  |    |          |          |  |                              |  |  |  |     |           |            |       |                         |           |          |       |                             |         |          |       |                         |         |          |       |     |   |         |       |                              |  |  |  |             |           |            |       |            |           |            |        |             |           |            |       |                                  |  |  |  |  |                  |                   |  |            |           |            |       |           |            |            |  |
|------------------------------------------|-----------------------|-----------------------------|-------------------------------------------------------------------------------------------------------------------------------------------------------------------------------------------------------------------------------------------------------------------------------------------------------------------------------------------------------------------------------------------------------------------------------------------------------------------------------------------------------------------------|----------------------------------------------------------|----------------------------------------------------------------|-------------------|----------------------------------------------------------------------------------------------------------------------------------------------------------------------------------------------------------------------------------------------------------------------------------------------------------------------------------------------------------------------------------------------------------------------------------------------------------------------------------------------------------------------------------------------------------------------------------------------------------------------------------------------------------------------------------------------------------------------------------------------------------------------------------------------------------------------------------------------------------------------------------------------------------------------------------------------------------------------------------------------------------------------------------------------------------------------------------------------------------------------------------------------------------------------------------------------------------------------------------------------------------------------------------------------------------------------------------------------------------------------------------------------------------------------------------------------------------------------------------------------------------------------------------------------------------------------------------------------------------------------------------------------------|--|-----------------------|---------------------------|---------|----------------------------------------|--|--|--|---|------------|------------|-------|---|-----------|------------|--|----|----------|----------|--|------------------------------|--|--|--|-----|-----------|------------|-------|-------------------------|-----------|----------|-------|-----------------------------|---------|----------|-------|-------------------------|---------|----------|-------|-----|---|---------|-------|------------------------------|--|--|--|-------------|-----------|------------|-------|------------|-----------|------------|--------|-------------|-----------|------------|-------|----------------------------------|--|--|--|--|------------------|-------------------|--|------------|-----------|------------|-------|-----------|------------|------------|--|
| <b>Studies involving a control group</b> |                       |                             |                                                                                                                                                                                                                                                                                                                                                                                                                                                                                                                         |                                                          |                                                                |                   |                                                                                                                                                                                                                                                                                                                                                                                                                                                                                                                                                                                                                                                                                                                                                                                                                                                                                                                                                                                                                                                                                                                                                                                                                                                                                                                                                                                                                                                                                                                                                                                                                                                    |  |                       |                           |         |                                        |  |  |  |   |            |            |       |   |           |            |  |    |          |          |  |                              |  |  |  |     |           |            |       |                         |           |          |       |                             |         |          |       |                         |         |          |       |     |   |         |       |                              |  |  |  |             |           |            |       |            |           |            |        |             |           |            |       |                                  |  |  |  |  |                  |                   |  |            |           |            |       |           |            |            |  |
| Swerdlow et al <sup>9</sup> 2004         | UK                    | Prospective Cohort Study    | <p><b>South Asian Ethnicity</b><br/>South Asians identified by computer algorithm (SANGRA) followed by a clerical check by an individual with expertise in this area. Patients with IDDM diagnosed &lt;30 years</p> <p><b>Method</b><br/>SMRs calculated, comparing mortality in the cohort to the corresponding mortality rates in the general population</p>                                                                                                                                                          | <p>Non South Asian : 23, 326</p> <p>South Asian: 424</p> | N/A                                                            | 1972 – 1999       | <p><b>Mortality</b><br/>The Standardised Mortality Ratios (SMR) for South Asian patients diagnosed &lt;30 years were 3.9(95% CI 2.0-6.9) in men and 10.1 (5.6-16.6) in women, and in the corresponding non-South Asians were 2.7 (2.6-2.9) in men and 4.0 (3.6-4.3) in women.</p>                                                                                                                                                                                                                                                                                                                                                                                                                                                                                                                                                                                                                                                                                                                                                                                                                                                                                                                                                                                                                                                                                                                                                                                                                                                                                                                                                                  |  |                       |                           |         |                                        |  |  |  |   |            |            |       |   |           |            |  |    |          |          |  |                              |  |  |  |     |           |            |       |                         |           |          |       |                             |         |          |       |                         |         |          |       |     |   |         |       |                              |  |  |  |             |           |            |       |            |           |            |        |             |           |            |       |                                  |  |  |  |  |                  |                   |  |            |           |            |       |           |            |            |  |
| Mehta et al <sup>10</sup> 2011           | UK                    | Cross-sectional study       | <p><b>South Asian (SA) Ethnicity</b><br/>Ethnicity was categorised as SA or white European (WE) based on patient record documentation or by analysis of their name using a validated name recognition software 'Nam Pechan' supplemented by a visual inspection of surnames and forenames.</p> <p><b>Method</b><br/>Patient characteristics and other data were extracted from the clinical workstation (CWS), a clinical database of patients attending a specialist outpatient diabetes clinic in Leicestershire.</p> | <p>WE: 1,169</p> <p>SA: 163</p>                          | <p><b>Mean age (years)</b></p> <p>WE: 45.3</p> <p>SA: 41.9</p> | 2003-2005         | <table border="1"> <thead> <tr> <th></th> <th>South Asian (n = 163)</th> <th>White European (n = 1169)</th> <th>p Value</th> </tr> </thead> <tbody> <tr> <td colspan="4"><b>Number of comorbidities (n (%))</b></td> </tr> <tr> <td>0</td> <td>114 (69.9)</td> <td>878 (75.1)</td> <td>0.166</td> </tr> <tr> <td>1</td> <td>36 (22.1)</td> <td>235 (20.1)</td> <td></td> </tr> <tr> <td>≥2</td> <td>13 (8.0)</td> <td>56 (4.8)</td> <td></td> </tr> <tr> <td colspan="4"><b>Macrovascular (n (%))</b></td> </tr> <tr> <td>CVD</td> <td>25 (15.3)</td> <td>132 (11.3)</td> <td>0.133</td> </tr> <tr> <td>Ischaemic heart disease</td> <td>20 (12.3)</td> <td>97 (8.3)</td> <td>0.093</td> </tr> <tr> <td>Peripheral vascular disease</td> <td>3 (1.8)</td> <td>31 (2.7)</td> <td>0.790</td> </tr> <tr> <td>Cerebrovascular disease</td> <td>6 (3.7)</td> <td>21 (1.8)</td> <td>0.130</td> </tr> <tr> <td>TIA</td> <td>0</td> <td>2 (0.2)</td> <td>1.000</td> </tr> <tr> <td colspan="4"><b>Microvascular (n (%))</b></td> </tr> <tr> <td>Retinopathy</td> <td>63 (38.7)</td> <td>561 (48.0)</td> <td>0.025</td> </tr> <tr> <td>Neuropathy</td> <td>24 (14.7)</td> <td>325 (27.8)</td> <td>&lt;0.001</td> </tr> <tr> <td>Nephropathy</td> <td>22 (13.5)</td> <td>118 (10.1)</td> <td>0.184</td> </tr> <tr> <td colspan="4"><b>Glycaemic control (n (%))</b></td> </tr> <tr> <td></td> <td><b>(n = 163)</b></td> <td><b>(n = 1169)</b></td> <td></td> </tr> <tr> <td>HbA1C &lt; 7%</td> <td>19 (12.0)</td> <td>193 (17.0)</td> <td>0.113</td> </tr> <tr> <td>HbA1C ≥7%</td> <td>144 (88.0)</td> <td>976 (83.0)</td> <td></td> </tr> </tbody> </table> |  | South Asian (n = 163) | White European (n = 1169) | p Value | <b>Number of comorbidities (n (%))</b> |  |  |  | 0 | 114 (69.9) | 878 (75.1) | 0.166 | 1 | 36 (22.1) | 235 (20.1) |  | ≥2 | 13 (8.0) | 56 (4.8) |  | <b>Macrovascular (n (%))</b> |  |  |  | CVD | 25 (15.3) | 132 (11.3) | 0.133 | Ischaemic heart disease | 20 (12.3) | 97 (8.3) | 0.093 | Peripheral vascular disease | 3 (1.8) | 31 (2.7) | 0.790 | Cerebrovascular disease | 6 (3.7) | 21 (1.8) | 0.130 | TIA | 0 | 2 (0.2) | 1.000 | <b>Microvascular (n (%))</b> |  |  |  | Retinopathy | 63 (38.7) | 561 (48.0) | 0.025 | Neuropathy | 24 (14.7) | 325 (27.8) | <0.001 | Nephropathy | 22 (13.5) | 118 (10.1) | 0.184 | <b>Glycaemic control (n (%))</b> |  |  |  |  | <b>(n = 163)</b> | <b>(n = 1169)</b> |  | HbA1C < 7% | 19 (12.0) | 193 (17.0) | 0.113 | HbA1C ≥7% | 144 (88.0) | 976 (83.0) |  |
|                                          | South Asian (n = 163) | White European (n = 1169)   | p Value                                                                                                                                                                                                                                                                                                                                                                                                                                                                                                                 |                                                          |                                                                |                   |                                                                                                                                                                                                                                                                                                                                                                                                                                                                                                                                                                                                                                                                                                                                                                                                                                                                                                                                                                                                                                                                                                                                                                                                                                                                                                                                                                                                                                                                                                                                                                                                                                                    |  |                       |                           |         |                                        |  |  |  |   |            |            |       |   |           |            |  |    |          |          |  |                              |  |  |  |     |           |            |       |                         |           |          |       |                             |         |          |       |                         |         |          |       |     |   |         |       |                              |  |  |  |             |           |            |       |            |           |            |        |             |           |            |       |                                  |  |  |  |  |                  |                   |  |            |           |            |       |           |            |            |  |
| <b>Number of comorbidities (n (%))</b>   |                       |                             |                                                                                                                                                                                                                                                                                                                                                                                                                                                                                                                         |                                                          |                                                                |                   |                                                                                                                                                                                                                                                                                                                                                                                                                                                                                                                                                                                                                                                                                                                                                                                                                                                                                                                                                                                                                                                                                                                                                                                                                                                                                                                                                                                                                                                                                                                                                                                                                                                    |  |                       |                           |         |                                        |  |  |  |   |            |            |       |   |           |            |  |    |          |          |  |                              |  |  |  |     |           |            |       |                         |           |          |       |                             |         |          |       |                         |         |          |       |     |   |         |       |                              |  |  |  |             |           |            |       |            |           |            |        |             |           |            |       |                                  |  |  |  |  |                  |                   |  |            |           |            |       |           |            |            |  |
| 0                                        | 114 (69.9)            | 878 (75.1)                  | 0.166                                                                                                                                                                                                                                                                                                                                                                                                                                                                                                                   |                                                          |                                                                |                   |                                                                                                                                                                                                                                                                                                                                                                                                                                                                                                                                                                                                                                                                                                                                                                                                                                                                                                                                                                                                                                                                                                                                                                                                                                                                                                                                                                                                                                                                                                                                                                                                                                                    |  |                       |                           |         |                                        |  |  |  |   |            |            |       |   |           |            |  |    |          |          |  |                              |  |  |  |     |           |            |       |                         |           |          |       |                             |         |          |       |                         |         |          |       |     |   |         |       |                              |  |  |  |             |           |            |       |            |           |            |        |             |           |            |       |                                  |  |  |  |  |                  |                   |  |            |           |            |       |           |            |            |  |
| 1                                        | 36 (22.1)             | 235 (20.1)                  |                                                                                                                                                                                                                                                                                                                                                                                                                                                                                                                         |                                                          |                                                                |                   |                                                                                                                                                                                                                                                                                                                                                                                                                                                                                                                                                                                                                                                                                                                                                                                                                                                                                                                                                                                                                                                                                                                                                                                                                                                                                                                                                                                                                                                                                                                                                                                                                                                    |  |                       |                           |         |                                        |  |  |  |   |            |            |       |   |           |            |  |    |          |          |  |                              |  |  |  |     |           |            |       |                         |           |          |       |                             |         |          |       |                         |         |          |       |     |   |         |       |                              |  |  |  |             |           |            |       |            |           |            |        |             |           |            |       |                                  |  |  |  |  |                  |                   |  |            |           |            |       |           |            |            |  |
| ≥2                                       | 13 (8.0)              | 56 (4.8)                    |                                                                                                                                                                                                                                                                                                                                                                                                                                                                                                                         |                                                          |                                                                |                   |                                                                                                                                                                                                                                                                                                                                                                                                                                                                                                                                                                                                                                                                                                                                                                                                                                                                                                                                                                                                                                                                                                                                                                                                                                                                                                                                                                                                                                                                                                                                                                                                                                                    |  |                       |                           |         |                                        |  |  |  |   |            |            |       |   |           |            |  |    |          |          |  |                              |  |  |  |     |           |            |       |                         |           |          |       |                             |         |          |       |                         |         |          |       |     |   |         |       |                              |  |  |  |             |           |            |       |            |           |            |        |             |           |            |       |                                  |  |  |  |  |                  |                   |  |            |           |            |       |           |            |            |  |
| <b>Macrovascular (n (%))</b>             |                       |                             |                                                                                                                                                                                                                                                                                                                                                                                                                                                                                                                         |                                                          |                                                                |                   |                                                                                                                                                                                                                                                                                                                                                                                                                                                                                                                                                                                                                                                                                                                                                                                                                                                                                                                                                                                                                                                                                                                                                                                                                                                                                                                                                                                                                                                                                                                                                                                                                                                    |  |                       |                           |         |                                        |  |  |  |   |            |            |       |   |           |            |  |    |          |          |  |                              |  |  |  |     |           |            |       |                         |           |          |       |                             |         |          |       |                         |         |          |       |     |   |         |       |                              |  |  |  |             |           |            |       |            |           |            |        |             |           |            |       |                                  |  |  |  |  |                  |                   |  |            |           |            |       |           |            |            |  |
| CVD                                      | 25 (15.3)             | 132 (11.3)                  | 0.133                                                                                                                                                                                                                                                                                                                                                                                                                                                                                                                   |                                                          |                                                                |                   |                                                                                                                                                                                                                                                                                                                                                                                                                                                                                                                                                                                                                                                                                                                                                                                                                                                                                                                                                                                                                                                                                                                                                                                                                                                                                                                                                                                                                                                                                                                                                                                                                                                    |  |                       |                           |         |                                        |  |  |  |   |            |            |       |   |           |            |  |    |          |          |  |                              |  |  |  |     |           |            |       |                         |           |          |       |                             |         |          |       |                         |         |          |       |     |   |         |       |                              |  |  |  |             |           |            |       |            |           |            |        |             |           |            |       |                                  |  |  |  |  |                  |                   |  |            |           |            |       |           |            |            |  |
| Ischaemic heart disease                  | 20 (12.3)             | 97 (8.3)                    | 0.093                                                                                                                                                                                                                                                                                                                                                                                                                                                                                                                   |                                                          |                                                                |                   |                                                                                                                                                                                                                                                                                                                                                                                                                                                                                                                                                                                                                                                                                                                                                                                                                                                                                                                                                                                                                                                                                                                                                                                                                                                                                                                                                                                                                                                                                                                                                                                                                                                    |  |                       |                           |         |                                        |  |  |  |   |            |            |       |   |           |            |  |    |          |          |  |                              |  |  |  |     |           |            |       |                         |           |          |       |                             |         |          |       |                         |         |          |       |     |   |         |       |                              |  |  |  |             |           |            |       |            |           |            |        |             |           |            |       |                                  |  |  |  |  |                  |                   |  |            |           |            |       |           |            |            |  |
| Peripheral vascular disease              | 3 (1.8)               | 31 (2.7)                    | 0.790                                                                                                                                                                                                                                                                                                                                                                                                                                                                                                                   |                                                          |                                                                |                   |                                                                                                                                                                                                                                                                                                                                                                                                                                                                                                                                                                                                                                                                                                                                                                                                                                                                                                                                                                                                                                                                                                                                                                                                                                                                                                                                                                                                                                                                                                                                                                                                                                                    |  |                       |                           |         |                                        |  |  |  |   |            |            |       |   |           |            |  |    |          |          |  |                              |  |  |  |     |           |            |       |                         |           |          |       |                             |         |          |       |                         |         |          |       |     |   |         |       |                              |  |  |  |             |           |            |       |            |           |            |        |             |           |            |       |                                  |  |  |  |  |                  |                   |  |            |           |            |       |           |            |            |  |
| Cerebrovascular disease                  | 6 (3.7)               | 21 (1.8)                    | 0.130                                                                                                                                                                                                                                                                                                                                                                                                                                                                                                                   |                                                          |                                                                |                   |                                                                                                                                                                                                                                                                                                                                                                                                                                                                                                                                                                                                                                                                                                                                                                                                                                                                                                                                                                                                                                                                                                                                                                                                                                                                                                                                                                                                                                                                                                                                                                                                                                                    |  |                       |                           |         |                                        |  |  |  |   |            |            |       |   |           |            |  |    |          |          |  |                              |  |  |  |     |           |            |       |                         |           |          |       |                             |         |          |       |                         |         |          |       |     |   |         |       |                              |  |  |  |             |           |            |       |            |           |            |        |             |           |            |       |                                  |  |  |  |  |                  |                   |  |            |           |            |       |           |            |            |  |
| TIA                                      | 0                     | 2 (0.2)                     | 1.000                                                                                                                                                                                                                                                                                                                                                                                                                                                                                                                   |                                                          |                                                                |                   |                                                                                                                                                                                                                                                                                                                                                                                                                                                                                                                                                                                                                                                                                                                                                                                                                                                                                                                                                                                                                                                                                                                                                                                                                                                                                                                                                                                                                                                                                                                                                                                                                                                    |  |                       |                           |         |                                        |  |  |  |   |            |            |       |   |           |            |  |    |          |          |  |                              |  |  |  |     |           |            |       |                         |           |          |       |                             |         |          |       |                         |         |          |       |     |   |         |       |                              |  |  |  |             |           |            |       |            |           |            |        |             |           |            |       |                                  |  |  |  |  |                  |                   |  |            |           |            |       |           |            |            |  |
| <b>Microvascular (n (%))</b>             |                       |                             |                                                                                                                                                                                                                                                                                                                                                                                                                                                                                                                         |                                                          |                                                                |                   |                                                                                                                                                                                                                                                                                                                                                                                                                                                                                                                                                                                                                                                                                                                                                                                                                                                                                                                                                                                                                                                                                                                                                                                                                                                                                                                                                                                                                                                                                                                                                                                                                                                    |  |                       |                           |         |                                        |  |  |  |   |            |            |       |   |           |            |  |    |          |          |  |                              |  |  |  |     |           |            |       |                         |           |          |       |                             |         |          |       |                         |         |          |       |     |   |         |       |                              |  |  |  |             |           |            |       |            |           |            |        |             |           |            |       |                                  |  |  |  |  |                  |                   |  |            |           |            |       |           |            |            |  |
| Retinopathy                              | 63 (38.7)             | 561 (48.0)                  | 0.025                                                                                                                                                                                                                                                                                                                                                                                                                                                                                                                   |                                                          |                                                                |                   |                                                                                                                                                                                                                                                                                                                                                                                                                                                                                                                                                                                                                                                                                                                                                                                                                                                                                                                                                                                                                                                                                                                                                                                                                                                                                                                                                                                                                                                                                                                                                                                                                                                    |  |                       |                           |         |                                        |  |  |  |   |            |            |       |   |           |            |  |    |          |          |  |                              |  |  |  |     |           |            |       |                         |           |          |       |                             |         |          |       |                         |         |          |       |     |   |         |       |                              |  |  |  |             |           |            |       |            |           |            |        |             |           |            |       |                                  |  |  |  |  |                  |                   |  |            |           |            |       |           |            |            |  |
| Neuropathy                               | 24 (14.7)             | 325 (27.8)                  | <0.001                                                                                                                                                                                                                                                                                                                                                                                                                                                                                                                  |                                                          |                                                                |                   |                                                                                                                                                                                                                                                                                                                                                                                                                                                                                                                                                                                                                                                                                                                                                                                                                                                                                                                                                                                                                                                                                                                                                                                                                                                                                                                                                                                                                                                                                                                                                                                                                                                    |  |                       |                           |         |                                        |  |  |  |   |            |            |       |   |           |            |  |    |          |          |  |                              |  |  |  |     |           |            |       |                         |           |          |       |                             |         |          |       |                         |         |          |       |     |   |         |       |                              |  |  |  |             |           |            |       |            |           |            |        |             |           |            |       |                                  |  |  |  |  |                  |                   |  |            |           |            |       |           |            |            |  |
| Nephropathy                              | 22 (13.5)             | 118 (10.1)                  | 0.184                                                                                                                                                                                                                                                                                                                                                                                                                                                                                                                   |                                                          |                                                                |                   |                                                                                                                                                                                                                                                                                                                                                                                                                                                                                                                                                                                                                                                                                                                                                                                                                                                                                                                                                                                                                                                                                                                                                                                                                                                                                                                                                                                                                                                                                                                                                                                                                                                    |  |                       |                           |         |                                        |  |  |  |   |            |            |       |   |           |            |  |    |          |          |  |                              |  |  |  |     |           |            |       |                         |           |          |       |                             |         |          |       |                         |         |          |       |     |   |         |       |                              |  |  |  |             |           |            |       |            |           |            |        |             |           |            |       |                                  |  |  |  |  |                  |                   |  |            |           |            |       |           |            |            |  |
| <b>Glycaemic control (n (%))</b>         |                       |                             |                                                                                                                                                                                                                                                                                                                                                                                                                                                                                                                         |                                                          |                                                                |                   |                                                                                                                                                                                                                                                                                                                                                                                                                                                                                                                                                                                                                                                                                                                                                                                                                                                                                                                                                                                                                                                                                                                                                                                                                                                                                                                                                                                                                                                                                                                                                                                                                                                    |  |                       |                           |         |                                        |  |  |  |   |            |            |       |   |           |            |  |    |          |          |  |                              |  |  |  |     |           |            |       |                         |           |          |       |                             |         |          |       |                         |         |          |       |     |   |         |       |                              |  |  |  |             |           |            |       |            |           |            |        |             |           |            |       |                                  |  |  |  |  |                  |                   |  |            |           |            |       |           |            |            |  |
|                                          | <b>(n = 163)</b>      | <b>(n = 1169)</b>           |                                                                                                                                                                                                                                                                                                                                                                                                                                                                                                                         |                                                          |                                                                |                   |                                                                                                                                                                                                                                                                                                                                                                                                                                                                                                                                                                                                                                                                                                                                                                                                                                                                                                                                                                                                                                                                                                                                                                                                                                                                                                                                                                                                                                                                                                                                                                                                                                                    |  |                       |                           |         |                                        |  |  |  |   |            |            |       |   |           |            |  |    |          |          |  |                              |  |  |  |     |           |            |       |                         |           |          |       |                             |         |          |       |                         |         |          |       |     |   |         |       |                              |  |  |  |             |           |            |       |            |           |            |        |             |           |            |       |                                  |  |  |  |  |                  |                   |  |            |           |            |       |           |            |            |  |
| HbA1C < 7%                               | 19 (12.0)             | 193 (17.0)                  | 0.113                                                                                                                                                                                                                                                                                                                                                                                                                                                                                                                   |                                                          |                                                                |                   |                                                                                                                                                                                                                                                                                                                                                                                                                                                                                                                                                                                                                                                                                                                                                                                                                                                                                                                                                                                                                                                                                                                                                                                                                                                                                                                                                                                                                                                                                                                                                                                                                                                    |  |                       |                           |         |                                        |  |  |  |   |            |            |       |   |           |            |  |    |          |          |  |                              |  |  |  |     |           |            |       |                         |           |          |       |                             |         |          |       |                         |         |          |       |     |   |         |       |                              |  |  |  |             |           |            |       |            |           |            |        |             |           |            |       |                                  |  |  |  |  |                  |                   |  |            |           |            |       |           |            |            |  |
| HbA1C ≥7%                                | 144 (88.0)            | 976 (83.0)                  |                                                                                                                                                                                                                                                                                                                                                                                                                                                                                                                         |                                                          |                                                                |                   |                                                                                                                                                                                                                                                                                                                                                                                                                                                                                                                                                                                                                                                                                                                                                                                                                                                                                                                                                                                                                                                                                                                                                                                                                                                                                                                                                                                                                                                                                                                                                                                                                                                    |  |                       |                           |         |                                        |  |  |  |   |            |            |       |   |           |            |  |    |          |          |  |                              |  |  |  |     |           |            |       |                         |           |          |       |                             |         |          |       |                         |         |          |       |     |   |         |       |                              |  |  |  |             |           |            |       |            |           |            |        |             |           |            |       |                                  |  |  |  |  |                  |                   |  |            |           |            |       |           |            |            |  |
| Shenoy et al <sup>11</sup> 2004          | UK                    | Retrospective Observational | <p><b>South Asian Ethnicity</b></p> <p><b>Method</b><br/>Rates of obesity/overweight in white</p>                                                                                                                                                                                                                                                                                                                                                                                                                       | <p>WE: 112</p> <p>SA: 38</p>                             | <p><b>Age Group (n)</b></p>                                    | N/A               | <p><b>Demographic Data</b><br/>No statistically significant difference in the two subgroups in relation to age, duration of diagnosis, daily insulin requirement, and metabolic control (median HbA1c 8.4% v 8.8% respectively for WE/SA).</p>                                                                                                                                                                                                                                                                                                                                                                                                                                                                                                                                                                                                                                                                                                                                                                                                                                                                                                                                                                                                                                                                                                                                                                                                                                                                                                                                                                                                     |  |                       |                           |         |                                        |  |  |  |   |            |            |       |   |           |            |  |    |          |          |  |                              |  |  |  |     |           |            |       |                         |           |          |       |                             |         |          |       |                         |         |          |       |     |   |         |       |                              |  |  |  |             |           |            |       |            |           |            |        |             |           |            |       |                                  |  |  |  |  |                  |                   |  |            |           |            |       |           |            |            |  |



1  
2  
3  
4  
5  
6  
7  
8  
9  
10  
11  
12  
13  
14  
15  
16  
17  
18  
19  
20  
21  
22  
23  
24  
25  
26  
27  
28  
29  
30  
31  
32  
33  
34  
35  
36  
37  
38  
39  
40  
41  
42  
43  
44  
45  
46  
47

|                                     |    |                       |                                                                                                                                                                                                                                                                                                                                                                                                    |                                             |                                                                 |           |                                                                                                                                                                                                                                                                                                                                                                                                                                                                                                                                                                                                                                                                                                                                                                                                                                                                                                            |  |  |
|-------------------------------------|----|-----------------------|----------------------------------------------------------------------------------------------------------------------------------------------------------------------------------------------------------------------------------------------------------------------------------------------------------------------------------------------------------------------------------------------------|---------------------------------------------|-----------------------------------------------------------------|-----------|------------------------------------------------------------------------------------------------------------------------------------------------------------------------------------------------------------------------------------------------------------------------------------------------------------------------------------------------------------------------------------------------------------------------------------------------------------------------------------------------------------------------------------------------------------------------------------------------------------------------------------------------------------------------------------------------------------------------------------------------------------------------------------------------------------------------------------------------------------------------------------------------------------|--|--|
|                                     |    | Study                 | Caucasian and South Asian groups, and to correlate these with age, duration of diagnosis, daily insulin requirement, and HbA1c. Included children between the ages of 2 and 18 years and who had been diagnosed more than a year ago.                                                                                                                                                              |                                             | 2-4 yrs (3)<br>5-9 yrs (33)<br>10-15 yrs (90)<br>16-18 yrs (24) |           | <b>Obesity in children</b><br>No statistically significant differences noted in the rates of overweight or obesity between white Caucasian and South Asian children at any age grouping.                                                                                                                                                                                                                                                                                                                                                                                                                                                                                                                                                                                                                                                                                                                   |  |  |
| Sivaprasad et al <sup>12</sup> 2012 | UK | Cross-sectional study | <p><b>Ethnicity</b><br/>Self-reported ethnicity based on UK census standard (Census 2001): categorised as 'White European', 'African/Afro-Caribbean', 'South Asian', 'Mixed', 'other ethnic group' and 'not known'.</p> <p><b>Method</b><br/>To assess ethnic variations of the prevalence of DR and visual impairment in two multi-racial cohorts in the UK (Yorkshire and South East London)</p> | WE: 2,628<br>Afro-Caribbean: 344<br>SA: 120 | Mean age of T1DM population: 39.4 yrs                           | 2008-2009 | <p><b>Ethnic group</b></p> <p><b>Prevalence: N (%)</b></p> <p><b>Age-standardised prevalence: % (95% CI)</b></p> <p><b>Any diabetic retinopathy</b></p> <p>White Europeans 1446 (55.0) 55.0 (53.2, 56.9)</p> <p>African/Afro-Caribbean 154 (44.8) 42.8 (37.3, 48.3)</p> <p>South Asian 64 (53.3) 54.0 (44.8, 63.2)</p> <p><b>Any maculopathy (M1)</b></p> <p>White Europeans 371 (14.1) 14.1 (12.8, 15.4)</p> <p>African/Afro-Caribbean 47 (13.7) 13.1 (9.4, 16.8)</p> <p>South Asian 17 (14.2) 16.6 (10.0, 23.2)</p> <p><b>CSMO (M1P1)</b></p> <p>White Europeans 171 (6.5) 6.5 (5.6, 7.4)</p> <p>African/Afro-Caribbean 35 (10.20) 10.0 (6.7, 13.3)</p> <p>South Asian 12 (10.0) 11.2 (5.4, 16.9)</p> <p><b>STDR (R2 or R3 or M1P1)</b></p> <p>White Europeans 318 (12.1) 12.1 (10.9, 13.3)</p> <p>African/Afro-Caribbean 53 (15.4) 15.9 (11.8, 20.0)</p> <p>South Asian 19 (15.8) 17.5 (10.6, 24.3)</p> |  |  |

1  
2  
3  
4  
5  
6  
7  
8  
9  
10  
11  
12  
13  
14  
15  
16  
17  
18  
19  
20  
21  
22  
23  
24  
25  
26  
27  
28  
29  
30  
31  
32  
33  
34  
35  
36  
37  
38  
39  
40  
41  
42  
43  
44  
45  
46  
47

|                                     |                      |                        |                                                                                                                                                                                                                                                                                                                  |                                                             |                                                                                          |     | CSMO- clinically significant macular oedema; M1- maculopathy P1- macular laser; STDR- sight threatening diabetic retinopathy; R1- mild to moderate non-proliferative diabetic retinopathy; R2- pre-proliferative diabetic retinopathy; R3- Proliferative diabetic retinopathy                                                                                                                                                                                                                                                                                                                                                                                                                                                                                                                                                                                                                                                                                                                                                                                                                                                                                                                                                                                                                                                                              |                                     |                      |                        |                     |                    |                               |                  |                  |                    |                |                            |               |               |                   |                   |                            |            |            |               |                   |                               |              |                  |                |              |                                   |                |                  |                |        |                                   |                  |                  |                |  |                     |                  |                  |                  |        |                              |                  |             |                  |  |
|-------------------------------------|----------------------|------------------------|------------------------------------------------------------------------------------------------------------------------------------------------------------------------------------------------------------------------------------------------------------------------------------------------------------------|-------------------------------------------------------------|------------------------------------------------------------------------------------------|-----|------------------------------------------------------------------------------------------------------------------------------------------------------------------------------------------------------------------------------------------------------------------------------------------------------------------------------------------------------------------------------------------------------------------------------------------------------------------------------------------------------------------------------------------------------------------------------------------------------------------------------------------------------------------------------------------------------------------------------------------------------------------------------------------------------------------------------------------------------------------------------------------------------------------------------------------------------------------------------------------------------------------------------------------------------------------------------------------------------------------------------------------------------------------------------------------------------------------------------------------------------------------------------------------------------------------------------------------------------------|-------------------------------------|----------------------|------------------------|---------------------|--------------------|-------------------------------|------------------|------------------|--------------------|----------------|----------------------------|---------------|---------------|-------------------|-------------------|----------------------------|------------|------------|---------------|-------------------|-------------------------------|--------------|------------------|----------------|--------------|-----------------------------------|----------------|------------------|----------------|--------|-----------------------------------|------------------|------------------|----------------|--|---------------------|------------------|------------------|------------------|--------|------------------------------|------------------|-------------|------------------|--|
| Brabaran et al <sup>13</sup> 2013   | UK                   | Cross-sectional study  | <p><b>Ethnicity</b><br/>Grouped into White European (WE), Afro-Caribbean (AC) and South Asian (SA)</p> <p><b>Method</b><br/>Data from patients diagnosed with T1DM below 35 years of age, from WE, AC or SA ancestry was obtained from an electronic database in a large multiethnic London diabetes clinic.</p> | 642 individuals in total<br><br>WE: 564<br>SA: 39<br>AC: 39 | Median age at diagnosis (years)<br><br>WE: 16.7<br>AC: 19.4<br>SA: 19.1                  | N/A | <table border="1"> <thead> <tr> <th>Parameters median (IQR)</th> <th>White European (WE)</th> <th>African Caribbean (AC)</th> <th>South Asian (SA)</th> <th>Significant</th> </tr> </thead> <tbody> <tr> <td><b>BMI (kg/m<sup>2</sup>)</b></td> <td>25.0 (22.3-27.7)</td> <td>25.7 (22.5-28.9)</td> <td>25.3 (22.2-28.5)</td> <td>NEEDS p Value</td> </tr> <tr> <td><b>Systolic BP (mm/Hg)</b></td> <td>130 (119-141)</td> <td>135 (121-149)</td> <td>122 (112-133)</td> <td>P&lt;0.05</td> </tr> <tr> <td><b>Diastolic BP (mmHg)</b></td> <td>75 (69-81)</td> <td>80 (72-88)</td> <td>73 (67-79)</td> <td>P&lt;0.05</td> </tr> <tr> <td><b>HbA1c (%)</b></td> <td>8.0(7.1-8.9)</td> <td>9.1 (7.6-10.7)</td> <td>8.3 (7.5-9.2)</td> <td>P&lt;0.05</td> </tr> <tr> <td><b>Microalbuminuria (mg/mmol)</b></td> <td>1.2 (-0.5-3.0)</td> <td>3.7 (-44.5-51.9)</td> <td>1.2 (-1.4-3.8)</td> <td>P&lt;0.05</td> </tr> <tr> <td><b>Total Cholesterol (mmol/L)</b></td> <td>4.50 (3.90-5.10)</td> <td>4.40 (3.90-4.90)</td> <td>4.00 (3.2-4.8)</td> <td></td> </tr> <tr> <td><b>HDL (mmol/L)</b></td> <td>1.49 (1.21-1.77)</td> <td>1.25 (0.95-1.56)</td> <td>1.30 (1.47-1.14)</td> <td>P&lt;0.05</td> </tr> <tr> <td><b>Triglyceride (mmol/L)</b></td> <td>0.93 (0.59-1.28)</td> <td>0.99 (0.58)</td> <td>1.07 (0.76-1.39)</td> <td></td> </tr> </tbody> </table> | Parameters median (IQR)             | White European (WE)  | African Caribbean (AC) | South Asian (SA)    | Significant        | <b>BMI (kg/m<sup>2</sup>)</b> | 25.0 (22.3-27.7) | 25.7 (22.5-28.9) | 25.3 (22.2-28.5)   | NEEDS p Value  | <b>Systolic BP (mm/Hg)</b> | 130 (119-141) | 135 (121-149) | 122 (112-133)     | P<0.05            | <b>Diastolic BP (mmHg)</b> | 75 (69-81) | 80 (72-88) | 73 (67-79)    | P<0.05            | <b>HbA1c (%)</b>              | 8.0(7.1-8.9) | 9.1 (7.6-10.7)   | 8.3 (7.5-9.2)  | P<0.05       | <b>Microalbuminuria (mg/mmol)</b> | 1.2 (-0.5-3.0) | 3.7 (-44.5-51.9) | 1.2 (-1.4-3.8) | P<0.05 | <b>Total Cholesterol (mmol/L)</b> | 4.50 (3.90-5.10) | 4.40 (3.90-4.90) | 4.00 (3.2-4.8) |  | <b>HDL (mmol/L)</b> | 1.49 (1.21-1.77) | 1.25 (0.95-1.56) | 1.30 (1.47-1.14) | P<0.05 | <b>Triglyceride (mmol/L)</b> | 0.93 (0.59-1.28) | 0.99 (0.58) | 1.07 (0.76-1.39) |  |
| Parameters median (IQR)             | White European (WE)  | African Caribbean (AC) | South Asian (SA)                                                                                                                                                                                                                                                                                                 | Significant                                                 |                                                                                          |     |                                                                                                                                                                                                                                                                                                                                                                                                                                                                                                                                                                                                                                                                                                                                                                                                                                                                                                                                                                                                                                                                                                                                                                                                                                                                                                                                                            |                                     |                      |                        |                     |                    |                               |                  |                  |                    |                |                            |               |               |                   |                   |                            |            |            |               |                   |                               |              |                  |                |              |                                   |                |                  |                |        |                                   |                  |                  |                |  |                     |                  |                  |                  |        |                              |                  |             |                  |  |
| <b>BMI (kg/m<sup>2</sup>)</b>       | 25.0 (22.3-27.7)     | 25.7 (22.5-28.9)       | 25.3 (22.2-28.5)                                                                                                                                                                                                                                                                                                 | NEEDS p Value                                               |                                                                                          |     |                                                                                                                                                                                                                                                                                                                                                                                                                                                                                                                                                                                                                                                                                                                                                                                                                                                                                                                                                                                                                                                                                                                                                                                                                                                                                                                                                            |                                     |                      |                        |                     |                    |                               |                  |                  |                    |                |                            |               |               |                   |                   |                            |            |            |               |                   |                               |              |                  |                |              |                                   |                |                  |                |        |                                   |                  |                  |                |  |                     |                  |                  |                  |        |                              |                  |             |                  |  |
| <b>Systolic BP (mm/Hg)</b>          | 130 (119-141)        | 135 (121-149)          | 122 (112-133)                                                                                                                                                                                                                                                                                                    | P<0.05                                                      |                                                                                          |     |                                                                                                                                                                                                                                                                                                                                                                                                                                                                                                                                                                                                                                                                                                                                                                                                                                                                                                                                                                                                                                                                                                                                                                                                                                                                                                                                                            |                                     |                      |                        |                     |                    |                               |                  |                  |                    |                |                            |               |               |                   |                   |                            |            |            |               |                   |                               |              |                  |                |              |                                   |                |                  |                |        |                                   |                  |                  |                |  |                     |                  |                  |                  |        |                              |                  |             |                  |  |
| <b>Diastolic BP (mmHg)</b>          | 75 (69-81)           | 80 (72-88)             | 73 (67-79)                                                                                                                                                                                                                                                                                                       | P<0.05                                                      |                                                                                          |     |                                                                                                                                                                                                                                                                                                                                                                                                                                                                                                                                                                                                                                                                                                                                                                                                                                                                                                                                                                                                                                                                                                                                                                                                                                                                                                                                                            |                                     |                      |                        |                     |                    |                               |                  |                  |                    |                |                            |               |               |                   |                   |                            |            |            |               |                   |                               |              |                  |                |              |                                   |                |                  |                |        |                                   |                  |                  |                |  |                     |                  |                  |                  |        |                              |                  |             |                  |  |
| <b>HbA1c (%)</b>                    | 8.0(7.1-8.9)         | 9.1 (7.6-10.7)         | 8.3 (7.5-9.2)                                                                                                                                                                                                                                                                                                    | P<0.05                                                      |                                                                                          |     |                                                                                                                                                                                                                                                                                                                                                                                                                                                                                                                                                                                                                                                                                                                                                                                                                                                                                                                                                                                                                                                                                                                                                                                                                                                                                                                                                            |                                     |                      |                        |                     |                    |                               |                  |                  |                    |                |                            |               |               |                   |                   |                            |            |            |               |                   |                               |              |                  |                |              |                                   |                |                  |                |        |                                   |                  |                  |                |  |                     |                  |                  |                  |        |                              |                  |             |                  |  |
| <b>Microalbuminuria (mg/mmol)</b>   | 1.2 (-0.5-3.0)       | 3.7 (-44.5-51.9)       | 1.2 (-1.4-3.8)                                                                                                                                                                                                                                                                                                   | P<0.05                                                      |                                                                                          |     |                                                                                                                                                                                                                                                                                                                                                                                                                                                                                                                                                                                                                                                                                                                                                                                                                                                                                                                                                                                                                                                                                                                                                                                                                                                                                                                                                            |                                     |                      |                        |                     |                    |                               |                  |                  |                    |                |                            |               |               |                   |                   |                            |            |            |               |                   |                               |              |                  |                |              |                                   |                |                  |                |        |                                   |                  |                  |                |  |                     |                  |                  |                  |        |                              |                  |             |                  |  |
| <b>Total Cholesterol (mmol/L)</b>   | 4.50 (3.90-5.10)     | 4.40 (3.90-4.90)       | 4.00 (3.2-4.8)                                                                                                                                                                                                                                                                                                   |                                                             |                                                                                          |     |                                                                                                                                                                                                                                                                                                                                                                                                                                                                                                                                                                                                                                                                                                                                                                                                                                                                                                                                                                                                                                                                                                                                                                                                                                                                                                                                                            |                                     |                      |                        |                     |                    |                               |                  |                  |                    |                |                            |               |               |                   |                   |                            |            |            |               |                   |                               |              |                  |                |              |                                   |                |                  |                |        |                                   |                  |                  |                |  |                     |                  |                  |                  |        |                              |                  |             |                  |  |
| <b>HDL (mmol/L)</b>                 | 1.49 (1.21-1.77)     | 1.25 (0.95-1.56)       | 1.30 (1.47-1.14)                                                                                                                                                                                                                                                                                                 | P<0.05                                                      |                                                                                          |     |                                                                                                                                                                                                                                                                                                                                                                                                                                                                                                                                                                                                                                                                                                                                                                                                                                                                                                                                                                                                                                                                                                                                                                                                                                                                                                                                                            |                                     |                      |                        |                     |                    |                               |                  |                  |                    |                |                            |               |               |                   |                   |                            |            |            |               |                   |                               |              |                  |                |              |                                   |                |                  |                |        |                                   |                  |                  |                |  |                     |                  |                  |                  |        |                              |                  |             |                  |  |
| <b>Triglyceride (mmol/L)</b>        | 0.93 (0.59-1.28)     | 0.99 (0.58)            | 1.07 (0.76-1.39)                                                                                                                                                                                                                                                                                                 |                                                             |                                                                                          |     |                                                                                                                                                                                                                                                                                                                                                                                                                                                                                                                                                                                                                                                                                                                                                                                                                                                                                                                                                                                                                                                                                                                                                                                                                                                                                                                                                            |                                     |                      |                        |                     |                    |                               |                  |                  |                    |                |                            |               |               |                   |                   |                            |            |            |               |                   |                               |              |                  |                |              |                                   |                |                  |                |        |                                   |                  |                  |                |  |                     |                  |                  |                  |        |                              |                  |             |                  |  |
| Sarwar et al <sup>14</sup> 2015     | UK                   | Cross-sectional Study  | <p><b>Ethnicity</b><br/>South Asian and White Caucasian</p> <p><b>Method</b><br/>Data analysed from two centres in the West Midlands (Queen Elizabeth Hospital [QEH] and New Cross Hospital [NCH])</p>                                                                                                           | White Caucasian: n: 278<br><br>South Asian: 139             | Median age (years)<br><br>NCH Caucasian: 34<br><br>NCH SA: 33.5<br><br>QEH Caucasian: 36 | N/A | <table border="1"> <thead> <tr> <th>Characteristic (number of patients)</th> <th>NCH South Asian (80)</th> <th>NCH Caucasian (160)</th> <th>QE South Asian (59)</th> <th>QE Caucasian (118)</th> </tr> </thead> <tbody> <tr> <td><b>HbA1c (mmol/mol)</b></td> <td>75 (61.5-88.5)</td> <td>76 (63-91)</td> <td>66.1 (55.25-81.75)</td> <td>70.5 (61-83.6)</td> </tr> <tr> <td><b>Systolic BP (mmHg)</b></td> <td>121 (113-132)</td> <td>125 (115-132)</td> <td>130 (120.5-141.5)</td> <td>131.5 (120.3-144)</td> </tr> <tr> <td><b>Diastolic BP (mmHg)</b></td> <td>-</td> <td>-</td> <td>86 (80.5—90)*</td> <td>82 (77.25-88.75)*</td> </tr> <tr> <td><b>BMI (kg/m<sup>2</sup>)</b></td> <td>25.6 (22.55-</td> <td>25.7 (22.5-30.4)</td> <td>30.9 (22.8-37)</td> <td>25 (22.6-28)</td> </tr> </tbody> </table>                                                                                                                                                                                                                                                                                                                                                                                                                                                                                                                                             | Characteristic (number of patients) | NCH South Asian (80) | NCH Caucasian (160)    | QE South Asian (59) | QE Caucasian (118) | <b>HbA1c (mmol/mol)</b>       | 75 (61.5-88.5)   | 76 (63-91)       | 66.1 (55.25-81.75) | 70.5 (61-83.6) | <b>Systolic BP (mmHg)</b>  | 121 (113-132) | 125 (115-132) | 130 (120.5-141.5) | 131.5 (120.3-144) | <b>Diastolic BP (mmHg)</b> | -          | -          | 86 (80.5—90)* | 82 (77.25-88.75)* | <b>BMI (kg/m<sup>2</sup>)</b> | 25.6 (22.55- | 25.7 (22.5-30.4) | 30.9 (22.8-37) | 25 (22.6-28) |                                   |                |                  |                |        |                                   |                  |                  |                |  |                     |                  |                  |                  |        |                              |                  |             |                  |  |
| Characteristic (number of patients) | NCH South Asian (80) | NCH Caucasian (160)    | QE South Asian (59)                                                                                                                                                                                                                                                                                              | QE Caucasian (118)                                          |                                                                                          |     |                                                                                                                                                                                                                                                                                                                                                                                                                                                                                                                                                                                                                                                                                                                                                                                                                                                                                                                                                                                                                                                                                                                                                                                                                                                                                                                                                            |                                     |                      |                        |                     |                    |                               |                  |                  |                    |                |                            |               |               |                   |                   |                            |            |            |               |                   |                               |              |                  |                |              |                                   |                |                  |                |        |                                   |                  |                  |                |  |                     |                  |                  |                  |        |                              |                  |             |                  |  |
| <b>HbA1c (mmol/mol)</b>             | 75 (61.5-88.5)       | 76 (63-91)             | 66.1 (55.25-81.75)                                                                                                                                                                                                                                                                                               | 70.5 (61-83.6)                                              |                                                                                          |     |                                                                                                                                                                                                                                                                                                                                                                                                                                                                                                                                                                                                                                                                                                                                                                                                                                                                                                                                                                                                                                                                                                                                                                                                                                                                                                                                                            |                                     |                      |                        |                     |                    |                               |                  |                  |                    |                |                            |               |               |                   |                   |                            |            |            |               |                   |                               |              |                  |                |              |                                   |                |                  |                |        |                                   |                  |                  |                |  |                     |                  |                  |                  |        |                              |                  |             |                  |  |
| <b>Systolic BP (mmHg)</b>           | 121 (113-132)        | 125 (115-132)          | 130 (120.5-141.5)                                                                                                                                                                                                                                                                                                | 131.5 (120.3-144)                                           |                                                                                          |     |                                                                                                                                                                                                                                                                                                                                                                                                                                                                                                                                                                                                                                                                                                                                                                                                                                                                                                                                                                                                                                                                                                                                                                                                                                                                                                                                                            |                                     |                      |                        |                     |                    |                               |                  |                  |                    |                |                            |               |               |                   |                   |                            |            |            |               |                   |                               |              |                  |                |              |                                   |                |                  |                |        |                                   |                  |                  |                |  |                     |                  |                  |                  |        |                              |                  |             |                  |  |
| <b>Diastolic BP (mmHg)</b>          | -                    | -                      | 86 (80.5—90)*                                                                                                                                                                                                                                                                                                    | 82 (77.25-88.75)*                                           |                                                                                          |     |                                                                                                                                                                                                                                                                                                                                                                                                                                                                                                                                                                                                                                                                                                                                                                                                                                                                                                                                                                                                                                                                                                                                                                                                                                                                                                                                                            |                                     |                      |                        |                     |                    |                               |                  |                  |                    |                |                            |               |               |                   |                   |                            |            |            |               |                   |                               |              |                  |                |              |                                   |                |                  |                |        |                                   |                  |                  |                |  |                     |                  |                  |                  |        |                              |                  |             |                  |  |
| <b>BMI (kg/m<sup>2</sup>)</b>       | 25.6 (22.55-         | 25.7 (22.5-30.4)       | 30.9 (22.8-37)                                                                                                                                                                                                                                                                                                   | 25 (22.6-28)                                                |                                                                                          |     |                                                                                                                                                                                                                                                                                                                                                                                                                                                                                                                                                                                                                                                                                                                                                                                                                                                                                                                                                                                                                                                                                                                                                                                                                                                                                                                                                            |                                     |                      |                        |                     |                    |                               |                  |                  |                    |                |                            |               |               |                   |                   |                            |            |            |               |                   |                               |              |                  |                |              |                                   |                |                  |                |        |                                   |                  |                  |                |  |                     |                  |                  |                  |        |                              |                  |             |                  |  |

1  
2  
3  
4  
5  
6  
7  
8  
9  
10  
11  
12  
13  
14  
15  
16  
17  
18  
19  
20  
21  
22  
23  
24  
25  
26  
27  
28  
29  
30  
31  
32  
33  
34  
35  
36  
37  
38  
39  
40  
41  
42  
43  
44  
45  
46  
47

|                                 |              |                                   |                                                                                                                                                                                                                                                                                 |                                                                                        |                                                                                                  |               |                                            |                             |                          |                             |                  |
|---------------------------------|--------------|-----------------------------------|---------------------------------------------------------------------------------------------------------------------------------------------------------------------------------------------------------------------------------------------------------------------------------|----------------------------------------------------------------------------------------|--------------------------------------------------------------------------------------------------|---------------|--------------------------------------------|-----------------------------|--------------------------|-----------------------------|------------------|
|                                 |              |                                   |                                                                                                                                                                                                                                                                                 |                                                                                        | QEHS<br>SA: 36                                                                                   |               | 28.4)                                      |                             |                          |                             |                  |
|                                 |              |                                   |                                                                                                                                                                                                                                                                                 |                                                                                        |                                                                                                  |               | <b>Total Cholesterol (mmol/L)</b>          | 4.7(3.9-5.45)               | 4.6 (4-5.3)              | 4.45 (3.8-5.45)             | 4.1 (3.7-4.95)   |
|                                 |              |                                   |                                                                                                                                                                                                                                                                                 |                                                                                        |                                                                                                  |               | <b>HDL (mmol/L)</b>                        | 1.3 (1.0-1.6)*              | 1.4 (1.2-1.65)*          | -                           | -                |
|                                 |              |                                   |                                                                                                                                                                                                                                                                                 |                                                                                        |                                                                                                  |               | <b>Cholesterol/ HDL</b>                    | 3.6 (2.9-4.5)*              | 3.2 (2.7-4.0)*           | -                           | -                |
|                                 |              |                                   |                                                                                                                                                                                                                                                                                 |                                                                                        |                                                                                                  |               | <b>Creatinine level (µmol/L)</b>           | 75 (66-87)                  | 78 (69-87)               | -                           | -                |
|                                 |              |                                   |                                                                                                                                                                                                                                                                                 |                                                                                        |                                                                                                  |               | <b>eGFR (ml/min/1.73m2)</b>                | 97.3 (82.2-109.9)           | 91.2 (79.3-103.9)        | -                           | -                |
|                                 |              |                                   |                                                                                                                                                                                                                                                                                 |                                                                                        |                                                                                                  |               | <b>Albumin/ Creatinine ratio (mg/mmol)</b> | 2.4 (0.7-3.6)               | 2.5 (0.75-3.5)           | -                           | -                |
|                                 |              |                                   |                                                                                                                                                                                                                                                                                 |                                                                                        |                                                                                                  |               | *P value <0.05                             |                             |                          |                             |                  |
| Thomas et al <sup>15</sup> 2012 | South Africa | Retrospective observational study | <b>Ethnicity</b><br>Caucasian, Indigenous African, Asian and mixed race. No description of how ethnicity identified.<br><br><b>Method</b><br>Retinal photography was conducted using a non-mydratic digital camera without mydriasis and graded by one of three senior graders. | Caucasian: 1247<br><br>Indigenous African: 117<br><br>Asian: 118<br><br>Mixed race: 49 | Mean age (yrs)<br>Caucasian: 35.7<br>Indigenous African: 36.3<br>Asian: 32.2<br>Mixed race: 32.6 | 2001-2010     | <b>Diabetic Retinopathy (DR)</b>           | <b>Any DR (n=541)</b>       |                          | <b>RDR (n=142)</b>          |                  |
|                                 |              |                                   |                                                                                                                                                                                                                                                                                 |                                                                                        |                                                                                                  |               | <b>Crude OR (95% CI)</b>                   | <b>Adjusted OR (95% CI)</b> | <b>Crude OR (95% CI)</b> | <b>Adjusted OR (95% CI)</b> |                  |
|                                 |              |                                   |                                                                                                                                                                                                                                                                                 |                                                                                        |                                                                                                  |               | <b>Caucasian (1,247)</b>                   | 1.00                        | 1.00                     | 1.00                        | 1.00             |
|                                 |              |                                   |                                                                                                                                                                                                                                                                                 |                                                                                        |                                                                                                  |               | <b>Indigenous African (117)</b>            | 0.71 (0.46-1.09)            | 1.72 (1.00-2.97)         | 0.95 (0.49-1.84)            | 3.40 (1.40-8.26) |
|                                 |              |                                   |                                                                                                                                                                                                                                                                                 |                                                                                        |                                                                                                  |               | <b>Asian (118)</b>                         | 1.10 (0.74-1.63)            | 2.02 (1.23-3.29)         | 1.05 (0.54-2.04)            | 2.07 (0.90-4.75) |
|                                 |              |                                   |                                                                                                                                                                                                                                                                                 |                                                                                        |                                                                                                  |               | <b>Mixed race (49)</b>                     | 1.01 (0.56-1.84)            | 1.29 (0.62-2.69)         | 1.10(0.42-2.88)             | 1.06 (0.36-3.18) |
| Omar et al <sup>16</sup> 1984   | South Africa | Cross-sectional analysis          | <b>Ethnicity</b><br>2 groups: Indians and Blacks.<br>No methodology for ethnicity identification provided                                                                                                                                                                       | Blacks: 92<br><br>Indians: 41                                                          | Mean age at onset (yrs)                                                                          | Not mentioned | <b>Complications</b>                       | <b>Blacks</b>               | <b>Indians</b>           | <b>Total</b>                |                  |
|                                 |              |                                   |                                                                                                                                                                                                                                                                                 |                                                                                        |                                                                                                  |               | <b>Keto-acidosis</b>                       | 53 (58%)                    | 22 (54%)                 | 75 (56%)                    |                  |
|                                 |              |                                   |                                                                                                                                                                                                                                                                                 |                                                                                        |                                                                                                  |               | <b>Neuropathy peripheral</b>               | 20 (22%)                    | 13 (32%)                 | 33 (25%)                    |                  |
|                                 |              |                                   |                                                                                                                                                                                                                                                                                 |                                                                                        |                                                                                                  |               |                                            | 4 (4%)                      | 2 (5%)                   | 6 (5%)                      |                  |

|                                    |                                                    |                                                    | <b>Method</b><br>Patients from King Edward VIII Hospital in Durban fulfilling WHO diagnostic criteria for insulin dependent diabetes mellitus. Both case records obtained and a physical examination performed to assess complications.                                                                                                                                                                                                                                      | Blacks:<br>17<br><br>Indians<br>: 23.5                                           |                           |                      | <b>autonomic</b><br><b>Retinopathy</b> 13 (14%) 9 (22%) 22 (17%)<br><b>Nephropathy</b> 3 (3%) 3 (7%) 6 (5%)<br><b>Triopathy</b> 1 (1%) 2 (5%) 3 (2%)<br><b>Ischaemic heart disease</b> - - -<br><b>Hypertension</b> 4 (4%) 2 (5%) 6 (5%)<br><b>Cataracts</b> 5 (5%) 2 (5%) 7 (5%)<br><b>Tuberculosis</b> 6 (7%) 1 (2%) 7 (5%)                                                                                                                                                                                                                                                                                                                                                                                                                                                                                                                                                                                                                                                                                                                                                                                                                                  |  |                 |                |                         |                    |              |                               |             |                        |                                                    |                                                    |                                                    |                             |               |               |                              |             |             |                           |              |              |
|------------------------------------|----------------------------------------------------|----------------------------------------------------|------------------------------------------------------------------------------------------------------------------------------------------------------------------------------------------------------------------------------------------------------------------------------------------------------------------------------------------------------------------------------------------------------------------------------------------------------------------------------|----------------------------------------------------------------------------------|---------------------------|----------------------|----------------------------------------------------------------------------------------------------------------------------------------------------------------------------------------------------------------------------------------------------------------------------------------------------------------------------------------------------------------------------------------------------------------------------------------------------------------------------------------------------------------------------------------------------------------------------------------------------------------------------------------------------------------------------------------------------------------------------------------------------------------------------------------------------------------------------------------------------------------------------------------------------------------------------------------------------------------------------------------------------------------------------------------------------------------------------------------------------------------------------------------------------------------|--|-----------------|----------------|-------------------------|--------------------|--------------|-------------------------------|-------------|------------------------|----------------------------------------------------|----------------------------------------------------|----------------------------------------------------|-----------------------------|---------------|---------------|------------------------------|-------------|-------------|---------------------------|--------------|--------------|
| Asmal et al <sup>17</sup><br>1981  | South Africa                                       | Cross-sectional analysis                           | <b>Ethnicity</b><br>2 groups: Indians and Blacks.<br>No methodology for ethnicity identification provided<br><br><b>Method</b><br>Clinic patients who fulfilled the following criteria: age of diagnosis of diabetes <35 years, development of symptoms +/- ketosis in the absence of insulin therapy, and duration of diabetes of at least 12 months. Case records examined, clinical assessments and biochemical tests carried out                                         | Blacks:<br>52<br><br>Indian:<br>38<br><br>Blacks:<br>21.8<br><br>Indian:<br>18.0 | Mean age at onset (years) | 4 weeks              | <b>Basic Biochemical Data</b><br><br><table border="1"> <thead> <tr> <th></th> <th>Indians</th> <th>Blacks</th> </tr> </thead> <tbody> <tr> <td><b>Glucose (mmol/l)</b></td> <td>15.80 ± 1.50</td> <td>14.20 ± 1.50</td> </tr> <tr> <td><b>Growth hormone (ng/ml)</b></td> <td>3.00 ± 0.76</td> <td>1.76 ± 0.41</td> </tr> <tr> <td><b>Cortisol (µg/dl)</b></td> <td>16.20 ± 1.47</td> <td>15.80 ± 1.40</td> </tr> <tr> <td><b>Cholesterol (mmol/l)</b></td> <td>5.17 ± 0.32</td> <td>4.78 ± 0.26</td> </tr> <tr> <td><b>Triglyceride (mmol/l)</b></td> <td>2.81 ± 0.97</td> <td>2.27 ± 0.83</td> </tr> <tr> <td><b>Creatinine (µg/dl)</b></td> <td>68.90 ± 4.10</td> <td>79.40 ± 6.70</td> </tr> </tbody> </table><br><b>Complications</b><br>Chronic complications associated with micro-angiopathy were detected in 12 Indians (33%) and 2 Blacks (4%). Commonest complication was neuropathy found in 19% of Indian diabetics and in 4% of Black diabetics. 2 Indians had evidence of diabetic triopathy.                                                                                                                                                  |  | Indians         | Blacks         | <b>Glucose (mmol/l)</b> | 15.80 ± 1.50       | 14.20 ± 1.50 | <b>Growth hormone (ng/ml)</b> | 3.00 ± 0.76 | 1.76 ± 0.41            | <b>Cortisol (µg/dl)</b>                            | 16.20 ± 1.47                                       | 15.80 ± 1.40                                       | <b>Cholesterol (mmol/l)</b> | 5.17 ± 0.32   | 4.78 ± 0.26   | <b>Triglyceride (mmol/l)</b> | 2.81 ± 0.97 | 2.27 ± 0.83 | <b>Creatinine (µg/dl)</b> | 68.90 ± 4.10 | 79.40 ± 6.70 |
|                                    | Indians                                            | Blacks                                             |                                                                                                                                                                                                                                                                                                                                                                                                                                                                              |                                                                                  |                           |                      |                                                                                                                                                                                                                                                                                                                                                                                                                                                                                                                                                                                                                                                                                                                                                                                                                                                                                                                                                                                                                                                                                                                                                                |  |                 |                |                         |                    |              |                               |             |                        |                                                    |                                                    |                                                    |                             |               |               |                              |             |             |                           |              |              |
| <b>Glucose (mmol/l)</b>            | 15.80 ± 1.50                                       | 14.20 ± 1.50                                       |                                                                                                                                                                                                                                                                                                                                                                                                                                                                              |                                                                                  |                           |                      |                                                                                                                                                                                                                                                                                                                                                                                                                                                                                                                                                                                                                                                                                                                                                                                                                                                                                                                                                                                                                                                                                                                                                                |  |                 |                |                         |                    |              |                               |             |                        |                                                    |                                                    |                                                    |                             |               |               |                              |             |             |                           |              |              |
| <b>Growth hormone (ng/ml)</b>      | 3.00 ± 0.76                                        | 1.76 ± 0.41                                        |                                                                                                                                                                                                                                                                                                                                                                                                                                                                              |                                                                                  |                           |                      |                                                                                                                                                                                                                                                                                                                                                                                                                                                                                                                                                                                                                                                                                                                                                                                                                                                                                                                                                                                                                                                                                                                                                                |  |                 |                |                         |                    |              |                               |             |                        |                                                    |                                                    |                                                    |                             |               |               |                              |             |             |                           |              |              |
| <b>Cortisol (µg/dl)</b>            | 16.20 ± 1.47                                       | 15.80 ± 1.40                                       |                                                                                                                                                                                                                                                                                                                                                                                                                                                                              |                                                                                  |                           |                      |                                                                                                                                                                                                                                                                                                                                                                                                                                                                                                                                                                                                                                                                                                                                                                                                                                                                                                                                                                                                                                                                                                                                                                |  |                 |                |                         |                    |              |                               |             |                        |                                                    |                                                    |                                                    |                             |               |               |                              |             |             |                           |              |              |
| <b>Cholesterol (mmol/l)</b>        | 5.17 ± 0.32                                        | 4.78 ± 0.26                                        |                                                                                                                                                                                                                                                                                                                                                                                                                                                                              |                                                                                  |                           |                      |                                                                                                                                                                                                                                                                                                                                                                                                                                                                                                                                                                                                                                                                                                                                                                                                                                                                                                                                                                                                                                                                                                                                                                |  |                 |                |                         |                    |              |                               |             |                        |                                                    |                                                    |                                                    |                             |               |               |                              |             |             |                           |              |              |
| <b>Triglyceride (mmol/l)</b>       | 2.81 ± 0.97                                        | 2.27 ± 0.83                                        |                                                                                                                                                                                                                                                                                                                                                                                                                                                                              |                                                                                  |                           |                      |                                                                                                                                                                                                                                                                                                                                                                                                                                                                                                                                                                                                                                                                                                                                                                                                                                                                                                                                                                                                                                                                                                                                                                |  |                 |                |                         |                    |              |                               |             |                        |                                                    |                                                    |                                                    |                             |               |               |                              |             |             |                           |              |              |
| <b>Creatinine (µg/dl)</b>          | 68.90 ± 4.10                                       | 79.40 ± 6.70                                       |                                                                                                                                                                                                                                                                                                                                                                                                                                                                              |                                                                                  |                           |                      |                                                                                                                                                                                                                                                                                                                                                                                                                                                                                                                                                                                                                                                                                                                                                                                                                                                                                                                                                                                                                                                                                                                                                                |  |                 |                |                         |                    |              |                               |             |                        |                                                    |                                                    |                                                    |                             |               |               |                              |             |             |                           |              |              |
| Ismail et al <sup>18</sup><br>2001 | Malaysia                                           | Cross Sectional study                              | <b>Ethnicity</b><br>3 groups: Indian, Malay and Chinese. Each ethnic group identified by appearance, language and religion.<br><br><b>Method</b><br>Patients recruited from 7 centres throughout Peninsular Malaysia. Blood taken for lipid levels, clinical history and physical examination performed. T1DM defined as acute symptoms associated with heavy ketonuria (>3+) or ketoacidosis at diagnosis, or continuous treatment with insulin within 1 year of diagnosis. | Indian:<br>154<br><br>Malay:<br>297<br><br>Chinese:<br>128                       | Mean age (years)          | June 1997- June 1998 | <b>Demographic Features</b><br><br><table border="1"> <thead> <tr> <th></th> <th>Malay (n = 297)</th> <th>Chinese(n=128)</th> <th>Indian (n=154)</th> </tr> </thead> <tbody> <tr> <td><b>BMI (kg/m2)</b></td> <td>26.8 ± 4.9</td> <td>25.4 ± 4.5</td> <td>25.5 ± 4.3</td> </tr> <tr> <td><b>Waist-hip ratio</b></td> <td>A: 0.88 ± 0.06<br/>M: 0.91 ± 0.06<br/>F: 0.86 ± 0.06</td> <td>A: 0.88 ± 0.07<br/>M: 0.90 ± 0.06<br/>F: 0.85 ± 0.07</td> <td>A: 0.89 ± 0.06<br/>M: 0.93 ± 0.06<br/>F: 0.85 ± 0.06</td> </tr> <tr> <td><b>HbA1c (%)</b></td> <td>8.8 (8.6-9.1)</td> <td>8.0 (7.7-8.3)</td> <td>8.5 (8.2-8.8)</td> </tr> </tbody> </table><br><b>Lipid Profiles (mmol/L, mean +/- SEM)</b><br><b>Total Cholesterol</b> : Indians (5.74 +/- 1.25), Chinese (5.64 +/- 1.42), Malay (5.58 +/- 1.38)<br><b>LDL Cholesterol</b> : Indians (3.89 +/- 1.20), Chinese (3.52 +/- 1.22), Malay (3.48 +/- 1.12)<br><b>HDL Cholesterol</b> (mean[95% CI]) : Indians (1.28 [1.19-1.38]), Chinese (1.57 [1.48-1.67]), Malay (1.37 [1.28-1.46])<br><b>Triglycerides</b> (mean[95% CI]): Indians (1.02 [0.9-1.16]), Chinese (0.82 [0.74-0.91]), Malay (1.11 [0.99-1.23]) |  | Malay (n = 297) | Chinese(n=128) | Indian (n=154)          | <b>BMI (kg/m2)</b> | 26.8 ± 4.9   | 25.4 ± 4.5                    | 25.5 ± 4.3  | <b>Waist-hip ratio</b> | A: 0.88 ± 0.06<br>M: 0.91 ± 0.06<br>F: 0.86 ± 0.06 | A: 0.88 ± 0.07<br>M: 0.90 ± 0.06<br>F: 0.85 ± 0.07 | A: 0.89 ± 0.06<br>M: 0.93 ± 0.06<br>F: 0.85 ± 0.06 | <b>HbA1c (%)</b>            | 8.8 (8.6-9.1) | 8.0 (7.7-8.3) | 8.5 (8.2-8.8)                |             |             |                           |              |              |
|                                    | Malay (n = 297)                                    | Chinese(n=128)                                     | Indian (n=154)                                                                                                                                                                                                                                                                                                                                                                                                                                                               |                                                                                  |                           |                      |                                                                                                                                                                                                                                                                                                                                                                                                                                                                                                                                                                                                                                                                                                                                                                                                                                                                                                                                                                                                                                                                                                                                                                |  |                 |                |                         |                    |              |                               |             |                        |                                                    |                                                    |                                                    |                             |               |               |                              |             |             |                           |              |              |
| <b>BMI (kg/m2)</b>                 | 26.8 ± 4.9                                         | 25.4 ± 4.5                                         | 25.5 ± 4.3                                                                                                                                                                                                                                                                                                                                                                                                                                                                   |                                                                                  |                           |                      |                                                                                                                                                                                                                                                                                                                                                                                                                                                                                                                                                                                                                                                                                                                                                                                                                                                                                                                                                                                                                                                                                                                                                                |  |                 |                |                         |                    |              |                               |             |                        |                                                    |                                                    |                                                    |                             |               |               |                              |             |             |                           |              |              |
| <b>Waist-hip ratio</b>             | A: 0.88 ± 0.06<br>M: 0.91 ± 0.06<br>F: 0.86 ± 0.06 | A: 0.88 ± 0.07<br>M: 0.90 ± 0.06<br>F: 0.85 ± 0.07 | A: 0.89 ± 0.06<br>M: 0.93 ± 0.06<br>F: 0.85 ± 0.06                                                                                                                                                                                                                                                                                                                                                                                                                           |                                                                                  |                           |                      |                                                                                                                                                                                                                                                                                                                                                                                                                                                                                                                                                                                                                                                                                                                                                                                                                                                                                                                                                                                                                                                                                                                                                                |  |                 |                |                         |                    |              |                               |             |                        |                                                    |                                                    |                                                    |                             |               |               |                              |             |             |                           |              |              |
| <b>HbA1c (%)</b>                   | 8.8 (8.6-9.1)                                      | 8.0 (7.7-8.3)                                      | 8.5 (8.2-8.8)                                                                                                                                                                                                                                                                                                                                                                                                                                                                |                                                                                  |                           |                      |                                                                                                                                                                                                                                                                                                                                                                                                                                                                                                                                                                                                                                                                                                                                                                                                                                                                                                                                                                                                                                                                                                                                                                |  |                 |                |                         |                    |              |                               |             |                        |                                                    |                                                    |                                                    |                             |               |               |                              |             |             |                           |              |              |

|                                  |              |                          |                                                                                                                                                                                                                                                                       |                  |                           |               |                                                  |                       |                        |
|----------------------------------|--------------|--------------------------|-----------------------------------------------------------------------------------------------------------------------------------------------------------------------------------------------------------------------------------------------------------------------|------------------|---------------------------|---------------|--------------------------------------------------|-----------------------|------------------------|
| Omar et al <sup>19</sup><br>1984 | South Africa | Cross sectional analysis | <b>Ethnicity</b><br>2 groups: Indians and Africans                                                                                                                                                                                                                    | African T1DM: 86 | Mean age of onset (range) | 2 year period | <b>Clinical characteristics of T1DM patients</b> |                       |                        |
|                                  |              |                          | <b>Method</b><br>Classification of diabetes based on criteria by National Diabetes Data Group and WHO expert committee. T1DM patients had always depended on insulin for control of symptoms and prevention of basal ketosis. All patients diagnosed <35 years of age | Indian T1DM: 40  |                           |               | African : 23.5 (1-35) yrs<br>Indian: 17 (1-35)   | <b>Characteristic</b> | <b>Africans (n=86)</b> |
|                                  |              |                          |                                                                                                                                                                                                                                                                       |                  |                           |               | <b>Male: Female</b>                              | 21: 25                | 17: 24                 |
|                                  |              |                          |                                                                                                                                                                                                                                                                       |                  |                           |               | <b>Mean % ideal body weight</b>                  | 106 (68-153)          | 91 (71-136)            |
|                                  |              |                          |                                                                                                                                                                                                                                                                       |                  |                           |               | <b>Mean duration of disease (years)</b>          | 3.8 (1-27)            | 5.4 (1-22)             |
|                                  |              |                          |                                                                                                                                                                                                                                                                       |                  |                           |               | <b>Mean age of onset</b>                         | 23.5 (1-35)           | 17 (1-35)              |

**Table 2:** Summary of Findings

|                    | <b>Findings in the SA population when compared to the specified ethnicity</b><br>(e.g. SA have the same BMI as WE, but higher HbA1c) |           |                |
|--------------------|--------------------------------------------------------------------------------------------------------------------------------------|-----------|----------------|
|                    | <b>WE</b>                                                                                                                            | <b>AC</b> | <b>Chinese</b> |
| <b>BMI</b>         | →                                                                                                                                    | →         |                |
| <b>HbA1c</b>       | ↑                                                                                                                                    | ↓         | ↑              |
| <b>SBP</b>         | ↓                                                                                                                                    | ↓         |                |
| <b>DBP</b>         | →                                                                                                                                    | →         |                |
| <b>HDL</b>         | ↓                                                                                                                                    | ↑         | ↓              |
| <b>Total Chol</b>  | →                                                                                                                                    | →         | →              |
| <b>Smoking</b>     | ↓                                                                                                                                    |           |                |
| <b>Retinopathy</b> | →                                                                                                                                    | →         | →              |
| <b>Nephropathy</b> | →                                                                                                                                    | ↓         |                |
| <b>Neuropathy</b>  | ↓                                                                                                                                    | →         |                |
| <b>CVD</b>         | →                                                                                                                                    | →         |                |
| <b>Mortality</b>   | ↑                                                                                                                                    |           |                |

## Results

### Risk Factors

#### *Body Mass Index (BMI)*

Six studies explored BMI and general weight measurements as an outcome: three comparing SA with WE only, one comparing with WE and AC, one comparing with AC only, and one comparing to Malay and Chinese. The three papers comparing SA to only WE demonstrated no statistically significant difference in BMI<sup>10, 11, 14</sup>. Mehta et al<sup>10</sup> in the UK showed a mean BMI (kg/m<sup>2</sup>) of 27.5 in SA (n=163) compared with 27.4 in WE (n=1169) (p=0.835)<sup>2</sup>. Similarities in BMI (kg/m<sup>2</sup>) between SA and WE have previously been reported in two different centres (median BMI 25.6 vs. 25.7 respectively and 30.9 vs. 25 respectively)<sup>14</sup> The results were not significant due to the small number of participants. Shenoy et al<sup>11</sup> also in the UK showed no statistically significant differences in the rates of overweight or obesity between WE (n=112) and SA (n=38) children with T1DM at any age grouping.

Brabarupan et al<sup>13</sup> in the UK showed no statistically significant difference in BMI (kg/m<sup>2</sup>) in SA (n=39) compared to WE (n=565) and AC (n=38) (median 25.3 vs. 25.0 vs. 25.7 respectively). Omar et al<sup>19</sup> in South Africa also showed no difference between SA (n=40) and AC (n=86) in mean % ideal body weight (91 vs. 106 respectively).

Lastly, a study by Ismail et al<sup>18</sup> in Malaysia showed that there was no difference in BMI (kg/m<sup>2</sup>) when comparing SA to Malay and Chinese (mean 22.0 vs. 22.3 vs. 22.0 respectively). However, there were significant differences in waist-hip ratio between the ethnic group males with SA having significantly higher waist-hip ratio compared with Chinese (mean 0.88 vs. 0.84 respectively, p=0.007).

In summary, there are no demonstrable differences in BMI between SA, WE and AC with T1DM. However SA males compared to Chinese males with T1DM had a higher waist-hip ratio.

#### *Glycaemic control*

Seven studies explored glycaemic control as an outcome: three comparing SA with WE only, two comparing with WE and AC, one comparing to AC only and one comparing with Malay and Chinese. Mehta et al<sup>10</sup> in the UK, demonstrated higher HbA1c (%) levels in SA (n=163) (mean 9.1%) compared with WE (n=1169) (mean 8.5%) (p<0.001). This is similar to the results from Brabarupan et al<sup>13</sup> in the UK who demonstrate SA (n=39) having higher HbA1c (%) levels (median 8.3) compared to WE (n=565) (median 8.0) but lower than AC (n=38) (median 9.1) (p<0.05). Another UK study analysed SA and WE at two different hospitals<sup>14</sup> and demonstrated similar HbA1c (%) (median 9.0 vs. 9.1 respectively and 8.2 vs. 8.6 respectively at the two different hospitals). Shenoy et al in<sup>11</sup> the UK found no significant difference in metabolic control between WE (n=112) and SA (n=38) children (median HbA1c 8.4% v 8.8% respectively). Thomas et al<sup>15</sup> in South Africa also found no statistically significant differences between SA (n=118), WE (n=1247) and AC (n=117) in HbA1c (%) levels (8.7 vs. 8.2 vs. 9.5 respectively). A study by Asmal et al<sup>17</sup> in South Africa showed that SA (n=38) had similar mean glucose concentrations (mmol/l) to AC (n=52) (15.80 vs. 14.20 respectively).

1  
2  
3 Ismail et al<sup>18</sup> in Malaysia showed that SA (n=76) have significantly higher HbA1c (%) levels compared  
4 to Chinese (n=91) and Malay (n=102) (mean 9.3 vs. 7.8 vs. 9.0 respectively,  $p<0.001$ ).  
5

6 In summary, studies suggest SA have higher HbA1c levels compared to WE, Malay and Chinese but  
7 lower than AC ethnic groups.  
8

### 9 **Blood Pressure**

10  
11 Four studies determined blood pressure/hypertension as an outcome: two comparing SA with WE  
12 only, one comparing with WE and AC and one comparing to AC only. The three papers with a WE  
13 group all showed that SA have lower blood pressure than the comparator groups. Mehta et al<sup>10</sup> in  
14 the UK, showed a significantly lower systolic blood pressure in SA (n=163) compared with WE  
15 (n=1169) (mean value 136.4 vs. 141.6 mmHg respectively;  $p=0.004$ ). However, there was no  
16 difference in diastolic blood pressure between SA (mean 75.4 vs. 75.4 mmHg respectively;  $p=0.41$ ).  
17 Brabarupan et al<sup>13</sup> in the UK also showed that SA (n=39) compared with WE (n=565) and AC (n=38)  
18 had a lower systolic blood pressure (median 120 vs. 130 vs. 135 mmHg respectively;  $p<0.05$ ) and a  
19 lower diastolic blood pressure (median 73 vs. 75 vs. 80 mmHg respectively,  $p<0.05$ ). We have  
20 previously noted that there was no significant difference in systolic blood pressure (mmHg) between  
21 SA and WE (median 121 vs. 125 respectively and 130 vs. 131.5 respectively in two different centres)  
22 in a UK population<sup>14</sup>. Another study reported that SA (n=59) had a higher diastolic blood pressure  
23 (mmHg) than WE (n=118) (median 86 vs. 82 respectively,  $p<0.05$ ). Lastly, Omar et al<sup>16</sup> in South Africa  
24 showed absence of difference between SA (n=41) and AC (n=92) in the prevalence of hypertension  
25 (5% vs. 4% respectively). The analyses in these studies were not adjusted.  
26  
27  
28  
29

30 In summary, studies suggest SA have lower systolic blood pressure compared with WE and AC, but  
31 there is no difference in the diastolic blood pressure across these three ethnic groups.  
32

### 33 **Lipid Profile**

34  
35 Five studies examined differences in lipid profiles: two comparing SA to WE only, one comparing to  
36 WE and AC, one comparing to AC only and one comparing to Malay and Chinese. A UK study has  
37 previously shown that SA (n=80) have lower levels of HDL (mmol/L) (median 1.3 vs. 1.4 respectively,  
38  $p<0.05$ ) and higher cholesterol/HDL ratio (median 3.6 vs. 3.2 respectively,  $p<0.05$ ) than WE  
39 (n=160)<sup>14</sup>. There were no statistically significant differences in the levels of total cholesterol  
40 (mmol/L) in SA compared to WE (median 4.7 vs. 4.6 respectively and 4.45 vs. 4.1 respectively).  
41 Another UK study<sup>13</sup> also showed that SA (n=39) had lower levels of HDL (mmol/L) compared with WE  
42 (n=565) but higher levels than AC (n=38) (median 1.30 vs. 1.49 vs. 1.25 respectively,  $p<0.05$ ). They  
43 also demonstrate absence of difference in total cholesterol levels ((mmol/L) between SA, WE and AC  
44 (median 4.00 vs. 4.50 vs. 4.40 respectively) and triglyceride levels (mmol/L) (median 1.07 vs. 0.93 vs.  
45 0.99 respectively). Mehta et al<sup>10</sup> in the UK also show similar levels of total cholesterol (mmol/L) in SA  
46 (n=163) (mean value 4.6) compared to WE (n=1169) (mean value 4.8) ( $p=0.132$ ).  
47  
48  
49

50  
51 Ismail et al<sup>18</sup> in Malaysia demonstrate that SA (n=76) compared with Malay (n=102) and Chinese (91)  
52 had no statistically significant differences in total cholesterol (mmol/L) levels (mean 5.74 vs. 5.58 vs.  
53 5.64 respectively) and LDL cholesterol (mmol/L) levels (mean 3.89 vs. 3.48 vs. 3.52 respectively). SA  
54 had significantly lower HDL cholesterol (mmol/L) compared with Chinese (mean 1.28 vs. 1.57  
55 respectively,  $p<0.01$ ) and significantly higher triglyceride levels (mmol/L) (mean 1.02 vs. 0.82  
56  
57  
58  
59

1  
2  
3 respectively,  $p < 0.03$ ). Lastly, Asmal et al<sup>17</sup> in South Africa found that SA (n=38) compared to AC  
4 (n=52) had no statistically significant differences in cholesterol levels (mmol/L) (mean 5.17 vs. 4.78  
5 respectively) and triglyceride levels (mmol/L) (2.81 vs. 2.27 respectively).  
6

7  
8 In summary, SA have lower HDL levels compared to WE and Chinese but higher than AC. SA have  
9 higher triglyceride levels compared with Chinese. There are no differences in total cholesterol  
10 between SA and WE, AC, Malay or Chinese ethnic groups.

### 11 **Smoking Status**

12  
13 Only one paper examined the prevalence of smoking in SA with T1DM. Mehta et al<sup>10</sup> in the UK  
14 demonstrated significantly lower prevalence of smokers in the SA group (n=28/163, 17%) compared  
15 to the WE group (n=359/1169, 30.7%) ( $p < 0.001$ ).  
16  
17

### 18 **Microvascular Disease**

#### 19 **Retinopathy**

20  
21 Four studies examined retinopathy; one comparing SA with WE only, two comparing to WE and AC,  
22 and one comparing to AC only. The most relevant study by Sivaprasad<sup>12</sup> et al investigated  
23 retinopathy in T1DM in the UK cohort consisting of 2,626 WE, 344 AC and 120 SA. The mean age in  
24 this study was 39.4 +/- 16.3 years. The study found no statistically significant differences between  
25 SA, WE and AC with T1DM in the age-standardised prevalence of maculopathy [95% confidence  
26 interval] (16.6% [10 – 23.2] vs. 14.1% [12.8-15.4] vs. 13.1% [9.4-16.8] respectively), clinically  
27 significant macular oedema (11.2% [5.4-16.9] vs. 6.5% [5.6-7.4] vs. 10.0% [6.7-13.3] respectively),  
28 sight threatening diabetic retinopathy (17.5% [10.6-24.3] vs. 12.1% [10.9-13.3] vs. 15.9% [11.8-20.0]  
29 respectively) and any diabetic retinopathy (54.0% [44.8-63.2] vs. 55.0% [53.2-56.9] vs. 42.8% [37.3-  
30 48.3] respectively).  
31  
32  
33  
34

35 Thomas et al<sup>15</sup>, in South Africa, reported that SA (n=118) were at increased risk of any diabetic  
36 retinopathy (Odds ratio 2.02 95% CI 1.23-3.29) when compared with WE (n=1,247), after adjustment  
37 for age at diagnosis, sex, duration of diabetes, HbA1c, hypertension, and smoking status. Mehta et  
38 al<sup>10</sup> in the UK showed that SA (n=163) compared to WE (n=1,169) had decreased prevalence of  
39 retinopathy (38.7% vs. 48.0% respectively,  $p = 0.025$ ). Lastly, Omar et al<sup>16</sup>, a South African study,  
40 compared SA (n=41) to AC (n=92) and were unable to demonstrate a statistically significant  
41 difference in the prevalence of retinopathy (22% vs. 14% respectively).  
42  
43

44 In summary, there is no difference in the prevalence of retinopathy between SA, WE and AC ethnic  
45 groups.  
46

#### 47 **Nephropathy**

48  
49 Five studies explored nephropathy and renal function as an outcome in SA with T1DM: two papers  
50 comparing to WE only, one comparing to WE and AC, and two papers comparing to AC only. The  
51 largest study, by Mehta et al<sup>10</sup> in the UK, did not show any differences between SA (n=163) and WE  
52 (n=1,169) in the prevalence of nephropathy (13.5% vs. 10.1% respectively,  $p = 0.184$ ).  
53  
54

55 In another UK study, no statistically significant differences were found between SA (n=80) and WE  
56 (n=160) in creatinine levels ( $\mu\text{mol/L}$ ) (median 76 vs. 78 respectively), albumin/creatinine ratio  
57  
58  
59



(mg/mmol) (median 2.4 vs. 2.5 respectively) and eGFR (ml/min/1.73<sup>2</sup>) (median 97.3 vs. 91.2 respectively)<sup>14</sup>. Brabarupan et al<sup>13</sup> in the UK showed no difference in the prevalence of microalbuminuria (mg/mmol) between SA (n=39) and WE (n=565) (median 1.2 vs. 1.2 respectively), however, AC (n=38) had significantly higher levels (median 3.7) (p<0.05). There were two studies in South Africa comparing SA to AC. The first by Omar et al<sup>16</sup> showed in their cohort of SA (n=41) and AC (n=92) there was absence of difference in the prevalence of nephropathy (7% vs. 3% respectively). Asmal et al<sup>17</sup> also showed no statistically relevant difference between SA (n=38) and AC (n=52) in creatinine levels (μmol/L) (mean 68.90 vs. 79.40 respectively).

In summary, there is no difference in the prevalence of nephropathy or difference in renal function between SA and WE. However, in one study SA had lower levels of microalbuminuria compared to AC.

### **Neuropathy**

Three studies included neuropathy as an outcome in SA: one comparing to WE only and two comparing to AC only. The most relevant study, Mehta et al<sup>10</sup> in the UK, showed that SA (n=163) compared to WE (n=1,169) have a lower prevalence of neuropathy (14.7% vs. 27.8% respectively, p<0.001). Omar et al<sup>16</sup> compared SA (n=41) to AC (n=92) in South Africa demonstrating no statistically significant differences in the prevalence of peripheral neuropathy (32% vs. 22% respectively) and autonomic neuropathy (5% vs. 4% respectively). Asmal et al<sup>17</sup> in South Africa showed increased prevalence of neuropathy in SA (n=38) compared to AC (n=52) (19% vs. 4% respectively), however no statistical tests were performed.

In summary, SA have lower prevalence of neuropathy than WE. There is no difference noted in the prevalence of neuropathy between SA and AC.

### **Macrovascular Disease**

Two studies reported cardiovascular outcomes: one comparing to WE only and the other comparing to AC only. The largest of these studies, by Mehta et al<sup>10</sup> in the UK, did not show evidence of difference between SA (n=163) and WE (n=1,169) with T1DM in prevalence of cardiovascular disease (15.3% vs. 11.3% respectively, p=0.133). Sub-analysis also did not reveal a difference between SA and WE in ischaemic heart disease (12.3% vs. 8.3% respectively, p=0.093), peripheral vascular disease (1.8% vs. 2.7% respectively, p=0.79) and cerebrovascular disease (3.7% vs. 1.8% respectively, p=0.13). It is important to note that the mean age in the T1DM group was lower (mean age of SA 41.9 years and WE 45.3 years) compared to T2DM (mean age 59.2 years SA and 66.2 years WE) which may have led to an under-representation of cardiovascular outcomes in the T1DM group.

A second study compared peripheral arterial disease between SA and AC in South Africa. Omar et al<sup>16</sup> showed that none of their participants in either the SA (n=41) or AC group (n=92) had peripheral vascular disease or ischaemic heart disease. This may also be due to their younger cohort of patients and small sample size.

In summary, the prevalence of cardiovascular disease between the SA, WE and AC populations do not differ.

### Mortality

Only one study examined the association of SA ethnicity on mortality in people with T1DM. Swerdlow et al<sup>9</sup> in a UK study investigated mortality of SA patients compared to the non-SA population, approximately 97% of which were Caucasian. The patients were followed for up to 28 years. In their cohort of 424 SA patients there were 27 deaths (6.4%) and in 23,326 non-SA there were 1,293 deaths (5.5%). Mortality in SA and non-SA with T1DM was calculated independently by comparing with the general population mortality using Standardized Mortality Ratios (SMR). Compared to the reference population, the SMR for SA patients were 3.9 (95% CI 2.0-6.9) in men and 10.1 (6.6-16.6) in women. The SMR for the corresponding non-SA were 2.7 (2.6-2.9) in men and 4.0 (3.6-4.3) in women. No details are provided as to the age of death in these patients. The most common cause of death in SA patients was cardiovascular disease (29.6%) and renal disease (14.8%). The 'other' causes of death accounted for 8 deaths (29.6%) and included septicaemia, systemic lupus erythematosus, bronchopneumonia, unspecified urinary tract infection and congenital malformation. The most common causes of death in non-SA were cardiovascular disease (n=474, 36.7%) and diabetes and hypoglycaemia (n=239, 18.5%). There was 1 death due to neoplasm in SA (3.7%) and 89 in non-SA (6.9%).

In summary, mortality is higher in SA with T1DM than non-SA when compared to the reference population in the UK. SA females were in particular affected, with a SMR that was over twice that of the non-SA female T1DM population. The commonest cause of death was cardiovascular disease.

## **Discussion**

This is the first systematic review to examine the differences in risk factors, microvascular complications, macrovascular complications and mortality between SA and other ethnic groups with T1DM. In summary (see Table 2), mortality is higher in SA with T1DM when compared to a largely WE reference population. Female SAs were in particular affected, with a SMR that was over twice that of the non-SA female T1DM population. The commonest cause of death is cardiovascular disease.

Overall, the studies suggest that cardiovascular disease itself is no more common in SA T1DM compared to WE. The study by Mehta et al that examined cardiovascular disease most clearly, studied a population with a mean age in their early 40s, and is likely to be too young for cardiovascular disease to manifest clinically. Whilst they observed a 50% higher risk of ischaemic heart disease (12.3 vs. 8.3%) and twice the risk of cerebrovascular disease (1.8 vs 3.7%) in SA compared to WE, the study had less than 30% power to detect a statistically significant difference. Some risk factors for cardiovascular disease appear greater in SA, with lower HDL than WE and the Chinese, and higher HbA1c. However the most powerful risk factors for cardiovascular disease of smoking and systolic BP are lower than in WE.

Most studies also suggest SA have higher HbA1c levels than WE<sup>24</sup>, Malay and Chinese but lower than AC ethnic groups. Despite this, rates of retinal and nephropathic microvascular disease were the same as the WE population and some (neuropathy) even lower. Compared to AC, SA had lower levels of microalbuminuria, lower HbA1c, lower systolic blood pressure and higher HDL levels. There were no statistically significant differences between these two ethnic groups in the remaining outcomes: cardiovascular disease, retinopathy, neuropathy and BMI.

### **Strengths and weaknesses**

There are a number of weaknesses with the analysis. The quality of the studies were poor with the majority of studies being retrospective observational or cross-sectional. It was also not possible to undertake a meta-analysis of the combined studies because the results were heterogeneous in nature. Furthermore, the methodology of how outcomes were assessed was not consistently reported, and the numbers of SA in each study were small. The strengths of this analysis are its comprehensive search strategy with clearly defined population and outcomes. Our search strategy incorporated both full-length papers as well as abstracts, included all languages and had a secondary search strategy to ensure we did not miss any relevant papers. We compared the SA group, the largest ethnic group globally with all other indigenous ethnic groups.

### **Implications**

Our analysis highlights two areas. Firstly, the ethnic disparity in mortality that has previously been described in T2DM is also present for SA patients with T1DM. This disparity is most likely due to cardiovascular disease but this association remains to be proven. Given the close association between glycaemic control with cardiovascular disease and excess mortality in T1D<sup>25</sup>, and the higher HbA1c in the SA population, the findings of this systematic review call for more aggressive glycaemic control in the SA T1D population. Culturally tailored programmes, as have been attempted for T2DM, may also be required for T1DM<sup>26</sup>. In addition, we may require more stringent control of other

1  
2  
3 cardiovascular risk factors such as lipids and blood pressure, though this needs to be formally  
4 addressed. Secondly, we highlight a need for a large, ideally prospective, multinational study  
5 exploring the effect of ethnicity in a uniform healthcare setting. This will enable consistent  
6 methodology, and standardised reporting of risk factors and outcomes. These outcomes should  
7 include those mentioned above, and in particular cardiovascular disease, but also outcomes such as  
8 peripheral vascular disease, depression and bone fractures that have not previously been addressed.  
9

10  
11  
12  
13  
14  
15  
16  
17  
18  
19  
20  
21  
22  
23  
24  
25  
26  
27  
28  
29  
30  
31  
32  
33  
34  
35  
36  
37  
38  
39  
40  
41  
42  
43  
44  
45  
46  
47  
48  
49  
50  
51  
52  
53  
54  
55  
56  
57  
58  
59  
60

For peer review only

1  
2  
3 **Competing interests:** All authors have completed the ICMJE uniform disclosure form at  
4 [www.icmje.org/coi\\_disclosure.pdf](http://www.icmje.org/coi_disclosure.pdf) and declare: no support from any organisation for the submitted  
5 work; no financial relationships with any organisations that might have an interest in the submitted  
6 work in the previous three years; KK (Co-Chair) PS and PN are members of the South Asian Health  
7 Foundation Working group on Diabetes.  
8

9  
10 **Acknowledgements:** KK acknowledges support from the NIHR Collaboration for Leadership in  
11 Applied Health Research and Care East Midlands (CLAHRC-EM) and the NIHR Leicester-  
12 Loughborough Biomedical Research Unit.  
13

14  
15 **Ethics Approval:** Not required  
16

17 **Funding:** None  
18

19 All authors had full access to all of the data (including statistical reports and tables) in the study and  
20 can take responsibility for the integrity of the data and the accuracy of the data analysis.  
21

22 The lead author (the manuscript's guarantor) affirms that the manuscript is an honest, accurate, and  
23 transparent account of the study being reported; that no important aspects of the study have been  
24 omitted; and that any discrepancies from the study as planned have been explained.  
25

26 **Data sharing:** no additional data available.  
27

28  
29 I, Komil Sarwar, the Corresponding Author of this article contained within the original manuscript  
30 which includes any diagrams & photographs within and any related or stand-alone film submitted  
31 (the Contribution") has the right to grant on behalf of all authors and does grant on behalf of all  
32 authors, a licence to the BMJ Publishing Group Ltd and its licencees, to permit this Contribution (if  
33 accepted) to be published in the BMH and any other BMJ Group products and to exploit all  
34 subsidiary rights, as set out in our licence at: [http://www.bmj.com/about-bmj/resources-](http://www.bmj.com/about-bmj/resources-authors/forms-policies-and-checklists/copyright-open-access-and-permission-reuse)  
35 [authors/forms-policies-and-checklists/copyright-open-access-and-permission-reuse.](http://www.bmj.com/about-bmj/resources-authors/forms-policies-and-checklists/copyright-open-access-and-permission-reuse)"  
36  
37

38 *IF YOU ARE A NATIONAL INSTITUTE OF HEALTH ("NIH") EMPLOYEE, CONTRACTOR OR TRAINEE* the  
39 following cover sheet will be accepted by the BMJ Group and NIH and incorporated into the above  
40 Licence.  
41

42 I am one author signing on behalf of all co-owners of the Contribution - YES  
43

#### 44 **Contributorship Statement** 45

46 Dr Komil N Sarwar: involvement in the design of the work, data collection, data analysis, writing the  
47 paper, drafting and revision of the paper  
48

49 Dr Phoebe Cliff: involvement in the design of the work, data collection, data analysis, helped with  
50 drafting and revision of the paper  
51

52  
53 Dr Ponnusamy Saravanan: involvement in the design of the work, reviewed all drafts of the paper,  
54 helped with revision of the paper  
55

56 Professor Kamlesh Khunti - involvement in the design of the work, reviewed all drafts of the paper,  
57  
58

1  
2  
3  
4  
5  
6  
7  
8  
9  
10  
11  
12  
13  
14  
15  
16  
17  
18  
19  
20  
21  
22  
23  
24  
25  
26  
27  
28  
29  
30  
31  
32  
33  
34  
35  
36  
37  
38  
39  
40  
41  
42  
43  
44  
45  
46  
47  
48  
49  
50  
51  
52  
53  
54  
55  
56  
57  
58  
59  
60

helped with revision of the paper

Dr Krishnarajah Nirantharakumar - responsible for the conception and design of the work, reviewed all drafts of the paper, helped with revision of the paper

Dr Parth Narendran - responsible for the conception and design of the work, reviewed all drafts of the paper, helped with revision of the paper

For peer review only

## References

1. Gholap N, Davies M, Patel K, Sattar N, Khunti K. Type 2 diabetes and cardiovascular disease in South Asians. *Primary Care Diabetes*. 2011;5(1):45-56
2. Department of Health. National Service Framework for Diabetes: Standards. 2001.
3. Tillin T, Hughes A, Mayet J, Whincup P, Sattar N, Forouhi N et al. The Relationship Between Metabolic Risk Factors and Incident Cardiovascular Disease in Europeans, South Asians, and African Caribbeans. *Journal of the American College of Cardiology*. 2013;61(17):1777-1786.
4. Willi S, Miller K, DiMeglio L, Klingensmith G, Simmons J, Tamborlane W et al. Racial-Ethnic Disparities in Management and Outcomes Among Children With Type 1 Diabetes. *PEDIATRICS*. 2015;135(3):424-434.
5. Borschuk A, Everhart R. Health disparities among youth with type 1 diabetes: A systematic review of the current literature. *Families, Systems, & Health*. 2015;33(3):297-313.
6. Office for National Statistics. Ethnicity and national identity in England and Wales 2011. 2012
7. Feltbower RG, Bodansky HJ, McKinney PA, Houghton J, Stephenson CR, Haigh D. Trends in the incidence of childhood diabetes in south Asians and other children in Bradford, UK. *Diabet Med* 2002;19:162–166
8. Wells G, Shea B, O'Connell D, Peterson J, Welch V, Losos M, Tugwell P. The Newcastle-Ottawa Scale (NOS) for assessing the quality of nonrandomised studies in meta-analyses. Ottawa Hospital Research Institute
9. Swerdlow A, Laing S, dos Santos Silva I, Slater S, Burden A, Botha J et al. Mortality of South Asian patients with insulin-treated diabetes mellitus in the United Kingdom: a cohort study. *Diabetic Medicine*. 2004;21(8):845-851.
10. Mehta R, Davies M, Ali S, Taub N, Stone M, Baker R et al. Association of cardiac and non-cardiac chronic disease comorbidity on glycaemic control in a multi-ethnic population with type 1 and type 2 diabetes. *Postgraduate Medical Journal*. 2011;87(1033):763-768.

- 1  
2  
3  
4  
5 11. Shenoy S, Waldron S, Cody D, Swift P. Ethnic group differences in overweight and obese  
6 children with type 1 diabetes mellitus. *Archives of Disease in Childhood*. 2004;89:1076-1077  
7  
8  
9  
10 12. Sivaprasad S, Gupta B, Gulliford M, Dodhia H, Mohamed M, Nagi D et al. Ethnic Variations in  
11 the Prevalence of Diabetic Retinopathy in People with Diabetes Attending Screening in the  
12 United Kingdom (DRIVE UK). *PLoS ONE*. 2012;7(3):e32182.  
13  
14  
15  
16 13. Brabarupan T, Misra S, Oliver N. A comparison of type 1 diabetes phenotype in a young  
17 multi-ethnic urban population. *European Association for the Study of Diabetes*. Abstract.  
18 2013  
19  
20  
21  
22  
23 14. Sarwar K, Gillani S, Singh B, Saravanan P, Narendran P. A comparison of diabetes type 1 in  
24 South Asian and Caucasian patients in the UK: the Type 1 in Minority Ethnic populations  
25 (TIME) study. *European Association for the Study of Diabetes*. Abstract. 2015  
26  
27  
28  
29 15. Thomas R, Distiller L, Luzio S, Chowdhury S, Melville V, Kramer B et al. Ethnic Differences in  
30 the Prevalence of Diabetic Retinopathy in Persons With Diabetes When First Presenting at a  
31 Diabetes Clinic in South Africa. *Diabetes Care*. 2012;36(2):336-341.  
32  
33  
34  
35  
36 16. Omar M, Asmal A. Complications of early-onset insulin-dependent diabetes mellitus in  
37 Blacks and Indians. *South African Medical Journal*. 1984;65(3):75-78  
38  
39  
40  
41 17. Asmal A, Jialal I, Leary W, Makhoba P, Omar M, Pillay N, Thandroyen F. Insulin-dependent  
42 diabetes mellitus with early onset in blacks and Indians. *South African Medical Journal*.  
43 1981;60(3):91-93  
44  
45  
46  
47 18. Ismail I, Nazaimoon W, Mohamad W, Letchuman R, Singaraveloo M, Hew F et al. Ethnicity  
48 and glycaemic control are major determinants of diabetic dyslipidaemia in Malaysia.  
49 *Diabetic Medicine*. 2001;18(6):501-508.  
50  
51  
52  
53  
54  
55  
56  
57  
58  
59  
60



- 1  
2  
3 19. Omar M, Asmal A. Patterns of diabetes mellitus in young Africans and Indians in Natal.  
4 Tropical and Geographical Medicine. 1984;36(2):133-138  
5  
6  
7
- 8 20. Gujral U, Pradeepa R, Weber M, Narayan K, Mohan V. Type 2 diabetes in South Asians:  
9 similarities and differences with white Caucasian and other populations. Ann NY Acad Sci.  
10 2013;1281(1):51-63.  
11  
12  
13
- 14 21. Intensive blood-glucose control with sulphonylureas or insulin compared with conventional  
15 treatment and risk of complications in patients with type 2 diabetes (UKPDS 33). The  
16 Lancet. 1998;352(9131):837-853.  
17  
18  
19  
20
- 21 22. UK Prospective Diabetes Study Group. Tight blood pressure control and risk of  
22 macrovascular and microvascular complications in type 2 diabetes: UKPDS 38. BMJ.  
23 1998;317(7160):703-713.  
24  
25  
26  
27
- 28 23. Bodicoat D, Gray L, Henson J, Webb D, Guru A, Misra A, Gupta R, Vikram N, Sattar N, Davies  
29 M, Khunti K. Body mass index and waist circumference cut-points in multi-ethnic  
30 populations from the UK and India: the ADDITION- Leicester, Jaipur heart watch and New  
31 Delhi cross-sectional studies. PLoS One. 2014; 5:9(3)  
32  
33
- 34 24. Mostafa S, Davies M, Webb D, Srinivasan B, Gray L, Khunti K.  
35 Independent effect of ethnicity on glycemia in South Asians and white Europeans. Diabetes  
36 Care. 2012;35(8):1746-8  
37  
38  
39
- 40 25. Lind M, Svensson AM, Kosiborod M, Gudbjörnsdottir S, Pivodic A, Wedel H, Dahlqvist  
41 S, Clements M, Rosengren A. Glycemic control and excess mortality in type 1 diabetes. N  
42 Engl J Med. 2014 Nov 20;371(21):1972-82  
43  
44
- 45 26. Bellary S, O'Hare JP, Raymond NT, Gumber A, Mughal S, Szczepura A, Kumar S, Barnett  
46 AH; UKADS Study Group. Enhanced diabetes care to patients of south Asian ethnic origin  
47 (the United Kingdom Asian Diabetes Study): a cluster randomised controlled trial.  
48 Lancet. 2008;371(9626):1769-76  
49  
50  
51  
52  
53  
54  
55  
56  
57  
58  
59  
60

### Appendix 1: Search Strategy

#### Embase

|           |                                                                                                      |             |
|-----------|------------------------------------------------------------------------------------------------------|-------------|
| 1         | type 1 diabetes.mp. or exp insulin dependent diabetes/                                               | 95641       |
| 2         | ethnicity.mp. or exp ethnic group/ or exp race/ or exp ethnicity/ or exp "ethnic or racial aspects"/ | 288124      |
| 3         | exp ethnic difference/                                                                               | 27336       |
| 4         | exp South Asian/                                                                                     | 27829       |
| 5         | Sri Lanka.mp. or exp Sri Lanka                                                                       | 7081        |
| 6         | Bangladesh.mp. or exp Bangladesh                                                                     | 13584       |
| 7         | India.mp. or exp India                                                                               | 156225      |
| 8         | Pakistan.mp. or exp Pakistan                                                                         | 22629       |
| 9         | Nepal.mp. or exp Nepal                                                                               | 8792        |
| 10        | Bhutan.mp. or exp Bhutan                                                                             | 507         |
| 11        | maldives.mp. or exp Maldives                                                                         | 268         |
| 12        | 3 or 4 or 5 or 6 or 7 or 8 or 9 or 10 or 11 or 12                                                    | 499040      |
| <b>13</b> | <b>1 and 12</b>                                                                                      | <b>2491</b> |

**Medline**

|           |                                                                                    |             |
|-----------|------------------------------------------------------------------------------------|-------------|
| 1         | exp Diabetes mellitus, Type 1/ or type 1<br>diabetes.mp.                           | 72398       |
| 2         | insulin dependent diabetes.mp.                                                     | 19957       |
| 3         | exp ethnic groups/ or ethnicity.mp                                                 | 158001      |
| 4         | ethnic differences.mp.                                                             | 6985        |
| 5         | ethnic aspects.mp.                                                                 | 30          |
| 6         | racial differences.mp.                                                             | 5002        |
| 7         | race.mp.                                                                           | 77099       |
| 8         | racial groups.mp.                                                                  | 2853        |
| 9         | racial aspects.mp.                                                                 | 34          |
| 10        | South Asian*.mp.                                                                   | 3740        |
| 11        | exp sri lanka/ or sri lanka*.mp                                                    | 6443        |
| 12        | exp bangladesh/ or bangladesh*.mp                                                  | 11009       |
| 13        | exp india/ or india*.mp.                                                           | 164014      |
| 14        | exp pakistan/ or pakistan*.mp.                                                     | 17599       |
| 15        | exp nepal/ or nepal*.mp.                                                           | 7799        |
| 16        | exp bhutan/ or bhutan*.mp.                                                         | 468         |
| 17        | maldives.mp.                                                                       | 195         |
| 18        | 1 or 2                                                                             | 82700       |
| 19        | 3 or 4 or 5 or 6 or 7 or 8 or 9 or 10 or 11 or<br>12 or 13 or 14 or 15 or 16 or 17 | 405983      |
| <b>20</b> | <b>18 and 19</b>                                                                   | <b>2231</b> |

1  
2  
3  
4  
5  
6  
7  
8  
9  
10  
11  
12  
13  
14  
15  
16  
17  
18  
19  
20  
21  
22  
23  
24  
25  
26  
27  
28  
29  
30  
31  
32  
33  
34  
35  
36  
37  
38  
39  
40  
41  
42  
43  
44  
45  
46  
47

**Appendix 2: Quality Assessment**

| Study                       | Design                            | Grading of study design                                                | Intervention                                                                                                                                                                                                        | Recruitment of study participants                                                                                                                                                                                                                                                                                       | Differences at baseline                                                | Analytical method                                                                                                                         | Follow up and measurement bias                                                                                                                                                                                                                                                                                                                                                                    | Assessment of confounders                                                                                                                                                                          | Additional notes                                                                                                                                                                                                                                   |
|-----------------------------|-----------------------------------|------------------------------------------------------------------------|---------------------------------------------------------------------------------------------------------------------------------------------------------------------------------------------------------------------|-------------------------------------------------------------------------------------------------------------------------------------------------------------------------------------------------------------------------------------------------------------------------------------------------------------------------|------------------------------------------------------------------------|-------------------------------------------------------------------------------------------------------------------------------------------|---------------------------------------------------------------------------------------------------------------------------------------------------------------------------------------------------------------------------------------------------------------------------------------------------------------------------------------------------------------------------------------------------|----------------------------------------------------------------------------------------------------------------------------------------------------------------------------------------------------|----------------------------------------------------------------------------------------------------------------------------------------------------------------------------------------------------------------------------------------------------|
| Swerdlow et al <sup>9</sup> | Prospective Cohort Study          | Selection: 4/4 stars<br>Comparability: 0/2 stars<br>Outcome: 3/3 stars | <b>South Asian Ethnicity</b><br>Identified by computer algorithm (SANGRA) followed by a clerical check by an individual with expertise in this area. Sensitivity of 89-96% and specificity of 94-98%.               | <b>Inclusion Criteria</b><br>Age at diagnosis of diabetes <30 years. Some identified in a national register of childhood cases assembled by the BDA from 1972-1986 and remainder from various geographical registers for parts of the UK during 1972-1993. Ages at diagnosis varied. Total cohort of 23, 752 with T1DM. | Age distributions of person-years were similar between the 2 groups    | <b>Type of analysis</b><br>Standardised mortality ratios compared using chi squared test.<br><br><b>Power calculation</b><br>Not reported | <b>Follow up</b><br>Till 31 <sup>st</sup> December 1999, or the date of death, 85 <sup>th</sup> birthday, emigration or other loss of follow up.<br><br><b>Lost to Follow up</b><br>1 South Asian and 151 non South Asians lost to follow up through emigration. 50 non South Asians lost to follow up in other ways.<br><br><b>Outcome</b><br>Mortality assessed in the same way in both groups. | <b>Effect of differences at baseline</b><br>No differences in age distributions. However, differences in comorbidities not reported. May be significant in mortality rates.                        | 1. Assumption that people diagnosed <30 years had T1DM and those diagnosed >30 years had T2DM. 2. Ethnic makeup of the non- South Asian group not reported (assumed Caucasian). 3. Small number of deaths in South Asian group.                    |
| Mehta et al <sup>10</sup>   | Cross-sectional study             | Selection: 1/5 stars<br>Comparability: 2/2 stars<br>Outcome: 3/3 stars | <b>South Asian Ethnicity</b><br>Ethnicity identified based on that given in the patient's record or by use of name recognition software 'Nam Pechan' supplemented by a visual inspection of surnames and forenames. | <b>Inclusion Criteria</b><br>Diabetes patients attending a specialist outpatient diabetes clinic in Leicestershire, UK, between 2003 and 2005.<br><br>Methodology of patients being classified as T1DM or T2DM not reported.                                                                                            | Age (3.4 years)<br>Duration of diabetes (5.9 years)<br>Smoking (13.7%) | <b>Type of analysis</b><br>Documented<br><br><b>Power calculation</b><br>Not reported                                                     | <b>Outcome</b><br>Baseline data and comorbidities data collected in the same way in both groups. Classification the same in both groups.                                                                                                                                                                                                                                                          | <b>Effect of differences at baseline</b><br>Younger age of onset and shorter duration of diabetes in South Asians may have led to under-representation of comorbidities in South Asians with T1DM. | 1. Cross sectional design so causation cannot be established<br>2. Data from one hospital, not generalizable<br>3. Did not comment on frequency of attendance for blood glucose monitoring so relationship between HbA1c and comorbidity not clear |
| Shenoy et al <sup>11</sup>  | Retrospective Observational Study | Selection: 1/5 stars<br>Comparability: 0/2 stars<br>Outcome: 2/3 stars | <b>South Asian Ethnicity</b>                                                                                                                                                                                        | <b>Inclusion Criteria</b><br>Children with T1DM between the ages of 2 and 18 years and who had been diagnosed more than a year ago.                                                                                                                                                                                     | Not reported                                                           | <b>Type of analysis and power calculation</b><br>Not reported                                                                             | <b>Outcome</b><br>Obesity assessed in both groups. No methodology given so unclear if bias in between two groups.                                                                                                                                                                                                                                                                                 | <b>Effect of differences at baseline</b><br>Possibly multiple characteristics not described                                                                                                        | 1. No methodology given<br>2. No description of statistical analysis used<br>3. No data on South Asians vs. non-South Asians                                                                                                                       |

|                                |                                     |                                                                        |                                                                                                                                           |                                                                                                                                                                                                                                                                        |                                                   |                                                                                       |                                                                                                                                                                                                                                                                                                                                                           |                                                                                                                                                                       |                                                                                                                                                                                                                           |
|--------------------------------|-------------------------------------|------------------------------------------------------------------------|-------------------------------------------------------------------------------------------------------------------------------------------|------------------------------------------------------------------------------------------------------------------------------------------------------------------------------------------------------------------------------------------------------------------------|---------------------------------------------------|---------------------------------------------------------------------------------------|-----------------------------------------------------------------------------------------------------------------------------------------------------------------------------------------------------------------------------------------------------------------------------------------------------------------------------------------------------------|-----------------------------------------------------------------------------------------------------------------------------------------------------------------------|---------------------------------------------------------------------------------------------------------------------------------------------------------------------------------------------------------------------------|
|                                |                                     |                                                                        |                                                                                                                                           |                                                                                                                                                                                                                                                                        |                                                   |                                                                                       |                                                                                                                                                                                                                                                                                                                                                           |                                                                                                                                                                       | given in the results                                                                                                                                                                                                      |
| Sivaprasad et al <sup>12</sup> | Cross-sectional study               | Selection: 1/5 stars<br>Comparability: 1/2 stars<br>Outcome: 3/3 stars | <b>South Asian Ethnicity</b><br>Self-reported ethnicity recorded at the time of screening according to the codes used in the Census 2001. | <b>Inclusion Criteria</b><br>All subjects in the diabetic screening register of West Yorkshire and South East London programmes were included in this study. Coverage of diabetic people in the respective regions: 95% in West Yorkshire and 81% in South East London | Not reported                                      | <b>Type of analysis</b><br>Documented<br><br><b>Power calculation</b><br>Not reported | <b>Outcome</b><br>Diabetic screening and retinopathy assessment same in both groups.                                                                                                                                                                                                                                                                      | <b>Effect of differences at baseline</b><br>Possibly multiple considering characteristics not described                                                               | 1.Records of patients that were not obtainable or exempt from diabetic screening (12%) did not have ethnicity data so South Asians may have been under-represented<br>2.Did not assess factors like BP, glycaemic control |
| Braparupan et al <sup>13</sup> | Cross-sectional retrospective study | Selection: 1/5 stars<br>Comparability: 0/2 stars<br>Outcome: 2/3 stars | <b>South Asian Ethnicity</b>                                                                                                              | <b>Inclusion Criteria</b><br>Subjects with T1DM diagnosed below 35 years of age from a London diabetes clinic. From white European, Afro-Caribbean or South Asian ancestry.                                                                                            | Not applicable                                    | <b>Type of analysis and power calculation</b><br>Not reported                         | <b>Outcome</b><br>Same outcome measures in both groups. No methodology given so unclear if bias in the way outcomes measured in both groups.                                                                                                                                                                                                              | <b>Effect of differences at baseline</b><br>Groups not matched for age and gender.                                                                                    | 1.Abstract only so full methodology and results not available<br>2.Groups not matched for age and gender                                                                                                                  |
| Sarwar et al <sup>14</sup>     | Retrospective case-controlled study | Selection: 0/5 stars<br>Comparability: 2/2 stars<br>Outcome: 2/3 stars | <b>South Asian Ethnicity</b>                                                                                                              | <b>Inclusion Criteria</b><br>Patients with T1DM in 2 centres in the West Midlands                                                                                                                                                                                      | Patients matched for age and gender               | <b>Type of analysis and power calculation</b><br>Not reported                         | <b>Outcome</b><br>Same outcome measures in both groups. No methodology given so unclear if bias in the way outcomes measured in both groups.                                                                                                                                                                                                              | <b>Factors not included in the study</b><br>Methodology not given so bias may be introduced with the two centres                                                      | 1. Abstract only                                                                                                                                                                                                          |
| Thomas et al <sup>15</sup>     | Retrospective observational study   | Selection: 1/5 stars<br>Comparability: 2/2 stars<br>Outcome: 3/3 stars | <b>South Asian Ethnicity</b>                                                                                                              | <b>Inclusion Criteria</b><br>Subjects classified as having T1DM or T2DM on clinical assessment according to the American Diabetes Association classification of diabetes.                                                                                              | Age (4.1 years)<br>Duration of diabetes (4 years) | <b>Type of analysis</b><br>Documented<br><br><b>Power calculation</b><br>Not reported | <b>Period of study</b><br>2001-2010 with baseline characteristics being obtained at the time of initial presentation.<br><br><b>Outcome</b><br>Same outcome measures in 2 groups but data collected from 2001-2010 so may be discrepancies between people being screened at the beginning and the end of the study.<br><br><b>Drop out or withdrawals</b> | <b>Effect of differences at baseline</b><br>Younger age of onset and shorter duration of diabetes in South Asians may have led to under-representation of retinopathy | 1.Study carried out in private hospital whereas most of diabetic South Africans use public health system so not generalizable<br>2.Lack of dilation prior to obtaining images may have led to underreporting of           |

|                            |                       |                                                                        |                                                                                       |                                                                                                                                                                                                                                                                                                                        |                                                              |                                                                                       |                                                                                                                                                                    |                                                                                                                                                                                    |                                                                                                                                                                                                             |
|----------------------------|-----------------------|------------------------------------------------------------------------|---------------------------------------------------------------------------------------|------------------------------------------------------------------------------------------------------------------------------------------------------------------------------------------------------------------------------------------------------------------------------------------------------------------------|--------------------------------------------------------------|---------------------------------------------------------------------------------------|--------------------------------------------------------------------------------------------------------------------------------------------------------------------|------------------------------------------------------------------------------------------------------------------------------------------------------------------------------------|-------------------------------------------------------------------------------------------------------------------------------------------------------------------------------------------------------------|
|                            |                       |                                                                        |                                                                                       |                                                                                                                                                                                                                                                                                                                        |                                                              |                                                                                       | None reported                                                                                                                                                      | in South Asians with T1DM.                                                                                                                                                         | retinopathy                                                                                                                                                                                                 |
| Omar et al <sup>16</sup>   | Cross-sectional study | Selection: 0/5 stars<br>Comparability: 0/2 stars<br>Outcome: 2/3 stars | <b>South Asian Ethnicity</b>                                                          | <b>Inclusion Criteria</b><br>Patients with onset of IDDM <35 years at King Edward Hospital in Durban. Diagnosis of IDDM based on the criteria recommended by WHO.                                                                                                                                                      | Age at onset (6.5 years)<br>Duration of diabetes (1.6 years) | <b>Type of analysis and power calculation</b><br>Not reported                         | <b>Outcome</b><br>Same outcome measures in 2 groups, however details not given as to when measurements were taken and by whom and if standardised for both groups. | <b>Effect of differences at baseline</b><br>Older age of onset and longer duration of diabetes in South Asians may have led to over-representation of complications in this group. | 1.No statistical methods were used to compare the two groups                                                                                                                                                |
| Asmal et al <sup>17</sup>  | Cross-sectional study | Selection: 0/5 stars<br>Comparability: 0/2 stars<br>Outcome: 2/3 stars | <b>South Asian Ethnicity</b>                                                          | <b>Inclusion Criteria</b><br>Clinic patients who fulfilled the following criteria: age of diagnosis of diabetes <35 years, development of symptoms +/- ketosis in the absence of insulin therapy, and duration of diabetes of at least 12 months. Patients with known alcoholic pancreatic diabetes were not included. | Current age (2.9 years)<br>Age of onset (3.8 years)          | <b>Type of analysis and power calculation</b><br>Not reported                         | <b>Outcome</b><br>Same outcome measures in 2 groups, however details not given as to when measurements were taken and by whom and if standardised for both groups. | <b>Effect of differences at baseline</b><br>Younger age and age of onset in South Asians may have led to a mis-representation of biochemical data in this group                    | 1.No statistical methods were used to compare the two groups                                                                                                                                                |
| Ismail et al <sup>18</sup> | Cross Sectional study | Selection: 2/5 stars<br>Comparability: 0/2 stars<br>Outcome: 3/3 stars | <b>South Asian Ethnicity</b><br>Identified by their appearance, language and religion | <b>Inclusion Criteria</b><br>T1DM defined as acute symptoms associated with heavy ketonuria (>3+) or ketoacidosis at diagnosis, or continuous treatment with insulin within 1 year of diagnosis. All diagnosed < 40 years                                                                                              | Similar baseline characteristics                             | <b>Type of analysis</b><br>Documented<br><br><b>Power calculation</b><br>Not reported | <b>Outcome</b><br>Same outcome measures in 2 groups                                                                                                                | <b>Effect of differences at baseline</b><br>No differences                                                                                                                         | 1.Clinic-based and not a population-based study. Those attending hospital may have more severe diabetes.<br>2.Conducted in public hospital where majority of patients cannot afford lipid-lowering therapy. |
| Omar et al <sup>19</sup>   | Cross sectional study | Selection: 0/5 stars<br>Comparability: 0/2 stars<br>Outcome: 3/3 stars | <b>South Asian Ethnicity</b>                                                          | <b>Inclusion Criteria</b><br>Onset of diabetes mellitus <35 years. Classification                                                                                                                                                                                                                                      | Duration of diabetes (1.6 years)                             | <b>Type of analysis</b><br>Documented                                                 | <b>Outcome</b><br>Same outcome measures in 2 groups                                                                                                                | <b>Effect of differences at baseline</b>                                                                                                                                           | 1. No outcomes apart from age of onset, duration of                                                                                                                                                         |

1  
2  
3  
4  
5  
6  
7  
8  
9  
10  
11  
12  
13  
14  
15  
16  
17  
18  
19  
20  
21  
22  
23  
24  
25  
26  
27  
28  
29  
30  
31  
32  
33  
34  
35  
36  
37  
38  
39  
40  
41  
42  
43  
44  
45  
46  
47

|  |  |                                          |  |                                                                                                                                                                                                                                             |  |                                          |  |                                                       |                                                                |
|--|--|------------------------------------------|--|---------------------------------------------------------------------------------------------------------------------------------------------------------------------------------------------------------------------------------------------|--|------------------------------------------|--|-------------------------------------------------------|----------------------------------------------------------------|
|  |  | lity: 0/2 stars<br>Outcome:<br>2/3 stars |  | of IDDM and NIDDM based on the criteria recommended by the National Diabetes Data Group and WHO Expert Committee on Diabetes Mellitus. IDDM patients had always depended on insulin for control of symptoms and prevention of basal ketosis |  | <b>Power calculation</b><br>Not reported |  | Not relevant as this is a purely descriptive analysis | disease and body weight. Limited information provided by study |
|--|--|------------------------------------------|--|---------------------------------------------------------------------------------------------------------------------------------------------------------------------------------------------------------------------------------------------|--|------------------------------------------|--|-------------------------------------------------------|----------------------------------------------------------------|

For peer review only



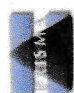

## PRISMA 2009 Checklist

| Section/topic                      | #  | Checklist item                                                                                                                                                                                                                                                                                              | Reported on page # |
|------------------------------------|----|-------------------------------------------------------------------------------------------------------------------------------------------------------------------------------------------------------------------------------------------------------------------------------------------------------------|--------------------|
| <b>TITLE</b>                       |    |                                                                                                                                                                                                                                                                                                             |                    |
| Title                              | 1  | Identify the report as a systematic review, meta-analysis, or both.                                                                                                                                                                                                                                         | 1                  |
| <b>ABSTRACT</b>                    |    |                                                                                                                                                                                                                                                                                                             |                    |
| Structured summary                 | 2  | Provide a structured summary including, as applicable: background; objectives; data sources; study eligibility criteria; participants, and interventions; study appraisal and synthesis methods; results; limitations; conclusions and implications of key findings; systematic review registration number. | 1                  |
| <b>INTRODUCTION</b>                |    |                                                                                                                                                                                                                                                                                                             |                    |
| Rationale                          | 3  | Describe the rationale for the review in the context of what is already known.                                                                                                                                                                                                                              | 3                  |
| Objectives                         | 4  | Provide an explicit statement of questions being addressed with reference to participants, interventions, comparisons, outcomes, and study design (PICOS).                                                                                                                                                  | 3                  |
| <b>METHODS</b>                     |    |                                                                                                                                                                                                                                                                                                             |                    |
| Protocol and registration          | 5  | Indicate if a review protocol exists, if and where it can be accessed (e.g., Web address), and, if available, provide registration information including registration number.                                                                                                                               | N/A                |
| Eligibility criteria               | 6  | Specify study characteristics (e.g., PICOS, length of follow-up) and report characteristics (e.g., years considered, language, publication status) used as criteria for eligibility, giving rationale.                                                                                                      | 3                  |
| Information sources                | 7  | Describe all information sources (e.g., databases with dates of coverage, contact with study authors to identify additional studies) in the search and date last searched.                                                                                                                                  | 3                  |
| Search                             | 8  | Present full electronic search strategy for at least one database, including any limits used, such that it could be repeated.                                                                                                                                                                               | 23-24              |
| Study selection                    | 9  | State the process for selecting studies (i.e., screening, eligibility, included in systematic review, and, if applicable, included in the meta-analysis).                                                                                                                                                   | 3-5                |
| Data collection process            | 10 | Describe method of data extraction from reports (e.g., piloted forms, independently, in duplicate) and any processes for obtaining and confirming data from investigators.                                                                                                                                  | 4                  |
| Data items                         | 11 | List and define all variables for which data were sought (e.g., PICOS, funding sources) and any assumptions and simplifications made.                                                                                                                                                                       | 3-4                |
| Risk of bias in individual studies | 12 | Describe methods used for assessing risk of bias of individual studies (including specification of whether this was done at the study or outcome level), and how this information is to be used in any data synthesis.                                                                                      | 4                  |
| Summary measures                   | 13 | State the principal summary measures (e.g., risk ratio, difference in means).                                                                                                                                                                                                                               | 4                  |
| Synthesis of results               | 14 | Describe the methods of handling data and combining results of studies, if done, including measures of consistency (e.g., $I^2$ ) for each meta-analysis.                                                                                                                                                   | N/A                |





## PRISMA 2009 Checklist

| Section/topic                 | #  | Checklist item                                                                                                                                                                                           | Reported on page # |
|-------------------------------|----|----------------------------------------------------------------------------------------------------------------------------------------------------------------------------------------------------------|--------------------|
| Risk of bias across studies   | 15 | Specify any assessment of risk of bias that may affect the cumulative evidence (e.g., publication bias, selective reporting within studies).                                                             | N/A                |
| Additional analyses           | 16 | Describe methods of additional analyses (e.g., sensitivity or subgroup analyses, meta-regression), if done, indicating which were pre-specified.                                                         | N/A                |
| <b>RESULTS</b>                |    |                                                                                                                                                                                                          |                    |
| Study selection               | 17 | Give numbers of studies screened, assessed for eligibility, and included in the review, with reasons for exclusions at each stage, ideally with a flow diagram.                                          | 5                  |
| Study characteristics         | 18 | For each study, present characteristics for which data were extracted (e.g., study size, PICOS, follow-up period) and provide the citations.                                                             | 6-11               |
| Risk of bias within studies   | 19 | Present data on risk of bias of each study and, if available, any outcome level assessment (see item 12).                                                                                                | 25-28              |
| Results of individual studies | 20 | For all outcomes considered (benefits or harms), present, for each study: (a) simple summary data for each intervention group (b) effect estimates and confidence intervals, ideally with a forest plot. | 6-11               |
| Synthesis of results          | 21 | Present results of each meta-analysis done, including confidence intervals and measures of consistency.                                                                                                  | N/A                |
| Risk of bias across studies   | 22 | Present results of any assessment of risk of bias across studies (see item 15).                                                                                                                          | 25-28              |
| Additional analysis           | 23 | Give results of additional analyses, if done (e.g., sensitivity or subgroup analyses, meta-regression [see item 16]).                                                                                    | N/A                |
| <b>DISCUSSION</b>             |    |                                                                                                                                                                                                          |                    |
| Summary of evidence           | 24 | Summarize the main findings including the strength of evidence for each main outcome; consider their relevance to key groups (e.g., healthcare providers, users, and policy makers).                     | 17                 |
| Limitations                   | 25 | Discuss limitations at study and outcome level (e.g., risk of bias), and at review-level (e.g., incomplete retrieval of identified research, reporting bias).                                            | 17                 |
| Conclusions                   | 26 | Provide a general interpretation of the results in the context of other evidence, and implications for future research.                                                                                  | 17-18              |
| <b>FUNDING</b>                |    |                                                                                                                                                                                                          |                    |
| Funding                       | 27 | Describe sources of funding for the systematic review and other support (e.g., supply of data); role of funders for the systematic review.                                                               | N/A                |

From: Moher D, Liberati A, Tetzlaff J, Altman DG, The PRISMA Group (2009). Preferred Reporting Items for Systematic Reviews and Meta-Analyses: The PRISMA Statement. PLoS Med 6(7): e1000097. doi:10.1371/journal.pmed1000097

For more information, visit: [www.prisma-statement.org](http://www.prisma-statement.org).

# BMJ Open

## Comorbidities, complications, and mortality in people of South Asian ethnicity with type 1 diabetes compared to other ethnic groups: a systematic review.

|                                 |                                                                                                                                                                                                                                                                                                                                                       |
|---------------------------------|-------------------------------------------------------------------------------------------------------------------------------------------------------------------------------------------------------------------------------------------------------------------------------------------------------------------------------------------------------|
| Journal:                        | <i>BMJ Open</i>                                                                                                                                                                                                                                                                                                                                       |
| Manuscript ID                   | bmjopen-2016-015005.R1                                                                                                                                                                                                                                                                                                                                |
| Article Type:                   | Research                                                                                                                                                                                                                                                                                                                                              |
| Date Submitted by the Author:   | 27-Feb-2017                                                                                                                                                                                                                                                                                                                                           |
| Complete List of Authors:       | Sarwar, Komil; University of Birmingham, Cliff, Phoebe; University of Birmingham Saravanan, Ponnusamy; University of Warwick Warwick Medical School, ; George Eliot Hospital, Khunti, Kamlesh; University of Leicester, Department of Health Sciences Nirantharakumar, Krishnarajah; University of Birmingham Narendran, P; University of Birmingham, |
| <b>Primary Subject Heading</b>: | Diabetes and endocrinology                                                                                                                                                                                                                                                                                                                            |
| Secondary Subject Heading:      | Epidemiology                                                                                                                                                                                                                                                                                                                                          |
| Keywords:                       | Type 1 Diabetes Mellitus, Ethnicity, South Asian                                                                                                                                                                                                                                                                                                      |
|                                 |                                                                                                                                                                                                                                                                                                                                                       |

SCHOLARONE™  
Manuscripts

**Title Page**

**Title of Paper:** Comorbidities, complications, and mortality in people of South Asian ethnicity with type 1 diabetes compared to other ethnic groups: a systematic review.

**Authors:** Komil N Sarwar (Foundation Doctor)<sup>1</sup>, Phoebe Cliff (Foundation Doctor)<sup>1</sup>, Ponnusamy Saravanan (Associate Clinical Professor)<sup>2</sup>, Kamlesh Khunti (Professor of Primary Care Diabetes and Vascular Medicine)<sup>3</sup>, Krishnarajah Nirantharakumar (Senior Clinical Lecturer)<sup>1</sup>, Parth Narendran (Reader in Diabetes Medicine)<sup>1</sup>

**Institution(s) of origin:** University of Birmingham, Edgbaston, Birmingham, England, B152TT<sup>1</sup>  
University of Warwick, Coventry, England, CV4 7AL<sup>2</sup>  
University of Leicester, University Road, Leicester, England LE1 7RH<sup>3</sup>

**Corresponding author:** Dr Krishnarajah Nirantharakumar

Public Health, Epidemiology and Biostatistics, University of Birmingham, Edgbaston Birmingham, B15 2TT, UK

Telephone: 44 (0)121 414 8344

Fax: +44 (0)121 414 6217

Email: k.nirantharan@bham.ac.uk

**Conflicts of Interest:** KK (Co-Chair) PS and PN are members of the South Asian Health Foundation Working group on Diabetes.

**Keywords:** Type 1 Diabetes Mellitus, Ethnicity, South Asian

**Word Count:** 3993

1  
2  
3 Comorbidities, complications, and mortality in people of South Asian ethnicity with type 1 diabetes  
4 compared to other ethnic groups: a systematic review.  
5

6 Komil N Sarwar, Phoebe Cliff, Ponnusamy Saravanan, Kamlesh Khunti, Krishnarajah  
7 Nirantharakumar, Parth Narendran  
8

9  
10 **Abstract**

11 **Objective.** To explore the association of South Asian (SA) ethnicity on comorbidities, microvascular  
12 and macrovascular complications, and mortality compared to other ethnic groups in people with  
13 Type 1 Diabetes Mellitus (T1DM).  
14

15  
16 **Design.** Systematic Review  
17

18 **Method.** A systematic literature search strategy was designed and carried out using Medline and  
19 Embase for full text and abstract studies published in English from 1946 to February 2016. The initial  
20 search identified 4, 722 papers. We assessed 305 full text articles in detail for potential inclusion.  
21 Ten papers met the inclusion criteria for review and an additional one paper was included from our  
22 secondary search strategy using the bibliography of included studies. In total, 11 studies were  
23 included.  
24

25  
26 **Eligibility criteria for selecting studies.** Studies were included if they were published in English,  
27 involved SA participants with T1DM and compared them to non-SA participants, and assessed one of  
28 the outcomes of comorbidities, microvascular complications, macrovascular complications, and  
29 mortality.  
30

31  
32 **Results.** SA with T1DM have higher mortality compared to White Europeans (WE), mainly  
33 contributed to by excess cardiovascular disease. SA have significantly higher HbA1c, lower HDL and  
34 lower rates of neuropathy compared to WE. There were no differences in rates of retinopathy and  
35 nephropathy. Compared to Africans, SA had lower levels of microalbuminuria, HbA1c and systolic  
36 blood pressure and higher HDL levels. There were no significant differences in the remaining  
37 outcomes: cardiovascular disease, retinopathy, neuropathy, and BMI. Furthermore, SA have higher  
38 HbA1c levels than Malay and Chinese and higher waist-hip ratio and lower HDL levels compared to  
39 Chinese only.  
40

41  
42 **Conclusion.** Our analysis highlights ethnic disparity in macrovascular outcomes that is so evident for  
43 Type 2 Diabetes Mellitus (T2DM) may also be present for SA patients with T1DM. We highlight the  
44 need for a large, prospective, cohort study exploring the effect of ethnicity in a uniform healthcare  
45 setting.  
46  
47  
48  
49  
50  
51  
52  
53  
54  
55  
56  
57  
58  
59  
60



### Strengths

- The strengths of this analysis are its comprehensive search strategy with clearly defined population and outcomes.
- Our search strategy incorporated both full-length papers as well as abstracts and had a secondary search strategy to ensure we did not miss any relevant papers.
- We compared the SA group, the largest ethnic group globally with all other indigenous ethnic groups.

### Weaknesses

- The quality of the studies were poor with the majority of studies being retrospective observational or cross-sectional.
- It was also not possible to undertake a meta-analysis of the combined studies because the results were heterogeneous in nature.
- Furthermore, the methodology of how outcomes were assessed was not consistently reported, and the numbers of SA in each study were small.

## **Background**

The epidemiology of Type 1 Diabetes Mellitus (T1DM) in South Asians (SA) is poorly understood. Its effects on metabolic control, diabetic complication rate, or indeed the underlying pathogenesis has yet to be explored. SA are at higher risk than White Europeans (WE) for the development of obesity and obesity-related diseases including insulin resistance, the metabolic syndrome, Type 2 Diabetes Mellitus (T2DM) and coronary heart disease<sup>1</sup>. Type 2 Diabetes Mellitus is 2-3 times more common in SA than in the WE population in the United Kingdom<sup>2</sup>, and up to three times more common among people of African origin<sup>3</sup>. Furthermore, SA with T2DM develop the condition 5-10 years earlier than WE, have increased prevalence of diabetic complications at presentation, worse outcomes, and die at a younger age<sup>2,4</sup>. These differences have not been explored in people with T1DM.

Willi et al<sup>5</sup> suggested that there were ethnic disparities in the outcomes of children with T1DM with black participants having higher mean HbA1c levels, more diabetic ketoacidosis and severe hypoglycaemic events compared to white or Hispanic participants. A recent systematic review<sup>6</sup> identified 16 studies in the current literature that showed racial/ethnic minority youth with T1DM having higher HbA1c compared to Caucasian youth. As the majority of these studies are conducted in the United States of America, their primary focus was on the black and Hispanic ethnic groups and youth with T1DM.

SA comprise 20% of the global population<sup>2</sup> and 7% of the UK population<sup>7</sup>. Furthermore, the incidence of T1DM appears to be similar in SA as in the background population<sup>7</sup>. Therefore, there is a need to understand the effect of ethnicity on the progression of the disease. The aim of this systematic review is to explore the association of SA ethnicity on comorbidities, microvascular and macrovascular complications, and mortality compared to other ethnic groups in people with T1DM.

## **Methods**

Terms indicative of T1DM and SA were searched for in MEDLINE (Ovid) and EMBASE using keywords and free text. The search terms included 'Type 1 Diabetes', 'Insulin Dependent Diabetes' and 'South Asian' as well as terms pertaining to ethnicity such as "ethnic or racial group", 'race', 'ethnic or racial aspects' and 'ethnic differences'. We also included search terms pertaining to the individual countries from South Asia as listed below. Further information on the search strategy can be found in Appendix 1. Full length papers and abstracts published in English were included in the search from 1946 to February 2016. The search was not limited to a particular study design or outcome and the papers did not have to be peer-reviewed. A secondary search strategy involved reading bibliographies of the included studies and contacting authors of the included studies and committee members of the South Asian Health Foundation (<http://www.sahf.org.uk>) enquiring about additional studies or on-going research.

The inclusion criteria were based on the Population, Intervention, Comparator and Outcome (PICO) framework. The population was SA with T1DM including both children and adults. A clinical diagnosis was accepted for the definition of T1DM. We defined SA ethnicity as persons originating from the following countries: India, Pakistan, Sri Lanka, Bangladesh, Nepal, Bhutan and the Maldives, and compared their comorbidities, complications and mortality to persons of any other ethnicity not classified as SA. We investigated comorbidities (body mass index, systolic and diastolic blood

1  
2  
3 pressure, HbA1c and lipid profile); microvascular complications (retinopathy, neuropathy and  
4 nephropathy) ; macrovascular complications (ischaemic heart disease and cerebrovascular disease);  
5 and cause-specific and all-cause mortality.  
6

7  
8 Identified titles and abstracts were reviewed independently by two researchers (KS and PC). All  
9 studies that were deemed suitable for potential inclusion were then further examined in detail by  
10 the two researchers independently to create the final list of included studies. Where there were  
11 discrepancies between the two researchers (KS and PC) this was resolved by discussion. Quality  
12 assessment and data extraction was performed by KS and then checked by PC to identify any missing  
13 information (Appendix 2). The Newcastle-Ottawa Quality Assessment Scale for observational studies  
14 was used for quality assessment<sup>8</sup>.  
15  
16

17  
18 We were not able to perform a meta-analysis because the studies were not comparable by  
19 outcomes measured, were of poor quality, and heterogeneous in the way SA ethnicity was defined.  
20 The results have been analysed as a narrative and presented as tabulations with textual description  
21 by each comorbidity and complication.  
22

23 **Patient Involvement:** Patients were not involved.  
24

## 25 **Results**

26  
27 The initial search identified 4,722 papers. After removing duplicates (1,194), the remaining 3,528  
28 titles and abstracts were screened. After excluding 3,223 papers in this initial screening process, 305  
29 full text articles were assessed in detail for potential inclusion into the analysis. Ten papers met the  
30 inclusion criteria for review. A secondary search using the bibliographies of included studies yielded  
31 an additional 1 paper (Figure 1). A total of 11 studies were therefore included: 6 studies were from  
32 the United Kingdom, 4 from South Africa and 1 from Malaysia. Nine of the papers were full length  
33 papers and 2 were abstracts. Of the included articles, 1 was a prospective cohort study, 2 were  
34 retrospective analysis of observational data and 8 studies were cross-sectional analyses. The results  
35 are summarised in Table 1 and Table 2.  
36  
37  
38  
39  
40  
41  
42  
43  
44  
45  
46  
47  
48  
49  
50  
51  
52  
53  
54  
55  
56  
57  
58  
59  
60

**Table 1:** Data extraction of studies included in systematic review

| Study & year published                     | Country | Design                | Method and Description                                                                                                                                                                                                                                                                                                                     | Number of Participants & Ethnic Group                        | Age description                                                          | Duration of Study | Key Outcomes                                                                                                                                                                              |                  |                  |                    |                   |
|--------------------------------------------|---------|-----------------------|--------------------------------------------------------------------------------------------------------------------------------------------------------------------------------------------------------------------------------------------------------------------------------------------------------------------------------------------|--------------------------------------------------------------|--------------------------------------------------------------------------|-------------------|-------------------------------------------------------------------------------------------------------------------------------------------------------------------------------------------|------------------|------------------|--------------------|-------------------|
| <b>Papers assessing T1DM comorbidities</b> |         |                       |                                                                                                                                                                                                                                                                                                                                            |                                                              |                                                                          |                   |                                                                                                                                                                                           |                  |                  |                    |                   |
| Brabarupan et al <sup>9</sup> 2013         | UK      | Cross-sectional study | <p><b>Ethnicity</b><br/>Grouped into White European (WE), African and South Asian (SA)</p> <p><b>T1DM</b><br/>Diagnosis of T1DM and diagnosed &lt;35 years of age</p> <p><b>Method</b><br/>Data from patients from WE, African or SA ancestry was obtained from an electronic database in a large multi-ethnic London diabetes clinic.</p> | 642 individuals in total<br>WE: 564<br>SA: 39<br>African: 39 | Median age at diagnosis (years)<br>WE: 16.7<br>African: 19.4<br>SA: 19.1 | N/A               | <p><b>Parameters median (IQR)</b></p> <p><b>White European (WE)</b></p> <p><b>African</b></p> <p><b>South Asian (SA)</b></p> <p><b>Significant</b></p>                                    |                  |                  |                    |                   |
|                                            |         |                       |                                                                                                                                                                                                                                                                                                                                            |                                                              |                                                                          |                   | <b>BMI (kg/m2)</b>                                                                                                                                                                        | 25.0 (22.3-27.7) | 25.7 (22.5-28.9) | 25.3 (22.2-28.5)   | NEEDS p Value     |
|                                            |         |                       |                                                                                                                                                                                                                                                                                                                                            |                                                              |                                                                          |                   | <b>Systolic BP (mmHg)</b>                                                                                                                                                                 | 130 (119-141)    | 135 (121-149)    | 122 (112-133)      | P<0.05            |
|                                            |         |                       |                                                                                                                                                                                                                                                                                                                                            |                                                              |                                                                          |                   | <b>Diastolic BP (mmHg)</b>                                                                                                                                                                | 75 (69-81)       | 80 (72-88)       | 73 (67-79)         | P<0.05            |
|                                            |         |                       |                                                                                                                                                                                                                                                                                                                                            |                                                              |                                                                          |                   | <b>HbA1c (%)</b>                                                                                                                                                                          | 8.0(7.1-8.9)     | 9.1 (7.6-10.7)   | 8.3 (7.5-9.2)      | P<0.05            |
|                                            |         |                       |                                                                                                                                                                                                                                                                                                                                            |                                                              |                                                                          |                   | <b>Microalbuminuria (mg/mmol)</b>                                                                                                                                                         | 1.2 (-0.5-3.0)   | 3.7 (-44.5-51.9) | 1.2 (-1.4-3.8)     | P<0.05            |
|                                            |         |                       |                                                                                                                                                                                                                                                                                                                                            |                                                              |                                                                          |                   | <b>Total Cholesterol (mmol/L)</b>                                                                                                                                                         | 4.50 (3.90-5.10) | 4.40 (3.90-4.90) | 4.00 (3.2-4.8)     |                   |
|                                            |         |                       |                                                                                                                                                                                                                                                                                                                                            |                                                              |                                                                          |                   | <b>HDL (mmol/L)</b>                                                                                                                                                                       | 1.49 (1.21-1.77) | 1.25 (0.95-1.56) | 1.30 (1.47-1.14)   | P<0.05            |
|                                            |         |                       |                                                                                                                                                                                                                                                                                                                                            |                                                              |                                                                          |                   | <b>Triglyceride (mmol/L)</b>                                                                                                                                                              | 0.93 (0.59-1.28) | 0.99 (0.58)      | 1.07 (0.76-1.39)   |                   |
| Sarwar et al <sup>10</sup> 2015            | UK      | Cross sectional Study | <p><b>Ethnicity</b><br/>South Asian and White Caucasian</p> <p><b>T1DM</b><br/>Coding of T1DM from the clinical database of two centres – no diagnostic criteria included</p> <p><b>Method</b><br/>Data analysed from two centres in the West Midlands (Queen Elizabeth Hospital [QEH] and New Cross Hospital [NCH])</p>                   | White Caucasians: 278<br>South Asian: 139                    | Median age (years)<br>NCH Caucasian: 34<br>NCH SA: 33.5                  | N/A               | <p><b>Characteristic (number of patients)</b></p> <p><b>NCH South Asian (80)</b></p> <p><b>NCH Caucasian (160)</b></p> <p><b>QE South Asian (59)</b></p> <p><b>QE Caucasian (118)</b></p> |                  |                  |                    |                   |
|                                            |         |                       |                                                                                                                                                                                                                                                                                                                                            |                                                              |                                                                          |                   | <b>HbA1c (mmol/mol)</b>                                                                                                                                                                   | 75 (61.5-88.5)   | 76 (63-91)       | 66.1 (55.25-81.75) | 70.5 (61-83.6)    |
|                                            |         |                       |                                                                                                                                                                                                                                                                                                                                            |                                                              |                                                                          |                   | <b>Systolic BP (mmHg)</b>                                                                                                                                                                 | 121 (113-132)    | 125 (115-132)    | 130 (120.5-141.5)  | 131.5 (120.3-144) |



1  
2  
3  
4  
5  
6  
7  
8  
9  
10  
11  
12  
13  
14  
15  
16  
17  
18  
19  
20  
21  
22  
23  
24  
25  
26  
27  
28  
29  
30  
31  
32  
33  
34  
35  
36  
37  
38  
39  
40  
41  
42  
43  
44  
45  
46  
47  
48  
49

|                                  |    |                                   |                                                                                                                                                                                                                                                                                                                                                                                                                                                               |                   |                                                                                                         |     |                                                                                                                                                                                                                                                                                                                                                                                                                                                              |                      |                   |                 |                   |
|----------------------------------|----|-----------------------------------|---------------------------------------------------------------------------------------------------------------------------------------------------------------------------------------------------------------------------------------------------------------------------------------------------------------------------------------------------------------------------------------------------------------------------------------------------------------|-------------------|---------------------------------------------------------------------------------------------------------|-----|--------------------------------------------------------------------------------------------------------------------------------------------------------------------------------------------------------------------------------------------------------------------------------------------------------------------------------------------------------------------------------------------------------------------------------------------------------------|----------------------|-------------------|-----------------|-------------------|
|                                  |    |                                   |                                                                                                                                                                                                                                                                                                                                                                                                                                                               |                   | QEH<br>Caucasian: 36                                                                                    |     | <b>Diastolic BP (mmHg)</b>                                                                                                                                                                                                                                                                                                                                                                                                                                   | -                    | -                 | 86 (80.5–90)*   | 82 (77.25-88.75)* |
|                                  |    |                                   |                                                                                                                                                                                                                                                                                                                                                                                                                                                               |                   | QEH<br>SA: 36                                                                                           |     | <b>BMI (kg/m2)</b>                                                                                                                                                                                                                                                                                                                                                                                                                                           | 25.6<br>(22.55-28.4) | 25.7 (22.5-30.4)  | 30.9 (22.8-37)  | 25 (22.6-28)      |
|                                  |    |                                   |                                                                                                                                                                                                                                                                                                                                                                                                                                                               |                   |                                                                                                         |     | <b>Total Cholesterol (mmol/L)</b>                                                                                                                                                                                                                                                                                                                                                                                                                            | 4.7(3.9-5.45)        | 4.6 (4-5.3)       | 4.45 (3.8-5.45) | 4.1 (3.7-4.95)    |
|                                  |    |                                   |                                                                                                                                                                                                                                                                                                                                                                                                                                                               |                   |                                                                                                         |     | <b>HDL (mmol/L)</b>                                                                                                                                                                                                                                                                                                                                                                                                                                          | 1.3 (1.0-1.6)*       | 1.4 (1.2-1.65)*   | -               | -                 |
|                                  |    |                                   |                                                                                                                                                                                                                                                                                                                                                                                                                                                               |                   |                                                                                                         |     | <b>Cholesterol/ HDL</b>                                                                                                                                                                                                                                                                                                                                                                                                                                      | 3.6 (2.9-4.5)*       | 3.2 (2.7-4.0)*    | -               | -                 |
|                                  |    |                                   |                                                                                                                                                                                                                                                                                                                                                                                                                                                               |                   |                                                                                                         |     | <b>Creatinine level (µmol/L)</b>                                                                                                                                                                                                                                                                                                                                                                                                                             | 75 (66-87)           | 78 (69-87)        | -               | -                 |
|                                  |    |                                   |                                                                                                                                                                                                                                                                                                                                                                                                                                                               |                   |                                                                                                         |     | <b>eGFR (ml/min/1.73m2)</b>                                                                                                                                                                                                                                                                                                                                                                                                                                  | 97.3 (82.2-109.9)    | 91.2 (79.3-103.9) | -               | -                 |
|                                  |    |                                   |                                                                                                                                                                                                                                                                                                                                                                                                                                                               |                   |                                                                                                         |     | <b>Albumin/ Creatinine ratio (mg/mmol)</b>                                                                                                                                                                                                                                                                                                                                                                                                                   | 2.4 (0.7-3.6)        | 2.5 (0.75-3.5)    | -               | -                 |
|                                  |    |                                   |                                                                                                                                                                                                                                                                                                                                                                                                                                                               |                   |                                                                                                         |     | *P value <0.05                                                                                                                                                                                                                                                                                                                                                                                                                                               |                      |                   |                 |                   |
| Sheno y et al <sup>11</sup> 2004 | UK | Retrospective Observational Study | <b>Ethnicity</b><br>South Asian and Caucasian<br><br><b>T1DM</b><br>Children coded as T1DM in a centre in Leicestershire – no diagnostic criteria included<br><br><b>Method</b><br>Rates of obesity/overweight in white Caucasian and South Asian groups, and to correlate these with age, duration of diagnosis, daily insulin requirement, and HbA1c. Included children between the ages of 2 and 18 years and who had been diagnosed more than a year ago. | WE: 112<br>SA: 38 | <b>Age Group (n)</b><br><br>2-4 yrs (3)<br><br>5-9 yrs (33)<br><br>10-15 yrs (90)<br><br>16-18 yrs (24) | N/A | <b>Demographic Data</b><br>No statistically significant difference in the two subgroups in relation to age, duration of diagnosis, daily insulin requirement, and metabolic control (median HbA1c 8.4% v 8.8% respectively for white Caucasian/South Asian).<br><br><b>Obesity in children</b><br>No statistically significant differences noted in the rates of overweight or obesity between white Caucasian and South Asian children at any age grouping. |                      |                   |                 |                   |

1  
2  
3  
4  
5  
6  
7  
8  
9  
10  
11  
12  
13  
14  
15  
16  
17  
18  
19  
20  
21  
22  
23  
24  
25  
26  
27  
28  
29  
30  
31  
32  
33  
34  
35  
36  
37  
38  
39  
40  
41  
42  
43  
44  
45  
46  
47  
48  
49

| Asmal et al <sup>12</sup><br>1981  | South Africa    | Cross-sectional analysis  | <p><b>Ethnicity</b><br/>2 groups: Indians and Black African.</p> <p><b>T1DM</b><br/>Clinic patients who fulfilled the following criteria: age of diagnosis of diabetes &lt;35 years, development of symptoms +/- ketosis in the absence of insulin therapy, and duration of diabetes of at least 12 months.</p> <p><b>Method</b><br/>Case records examined, clinical assessments and biochemical tests carried out</p>                                                                                          | Black African: 52<br><br>Indian: 38               | Mean age at onset (years)<br><br>Blacks: 21.8<br><br>Indian: 18.0                             | 4 weeks              | <p><b>Basic Biochemical Data</b></p> <table border="1"> <thead> <tr> <th></th> <th>Indians</th> <th>Black African</th> </tr> </thead> <tbody> <tr> <td>Glucose (mmol/l)</td> <td>15.80 ± 1.50</td> <td>14.20 ± 1.50</td> </tr> <tr> <td>Growth hormone (ng/ml)</td> <td>3.00 ± 0.76</td> <td>1.76 ± 0.41</td> </tr> <tr> <td>Cortisol (µg/dl)</td> <td>16.20 ± 1.47</td> <td>15.80 ± 1.40</td> </tr> <tr> <td>Cholesterol (mmol/l)</td> <td>5.17 ± 0.32</td> <td>4.78 ± 0.26</td> </tr> <tr> <td>Triglyceride (mmol/l)</td> <td>2.81 ± 0.97</td> <td>2.27 ± 0.83</td> </tr> <tr> <td>Creatinine (µg/dl)</td> <td>68.90 ± 4.10</td> <td>79.40 ± 6.70</td> </tr> </tbody> </table> <p><b>Complications</b></p> <p>Chronic complications associated with micro-angiopathy were detected in 12 Indians (33%) and 2 Blacks (4%). Commonest complication was neuropathy found in 19% of Indian diabetics and in 4% of Black diabetics. 2 Indians had evidence of diabetic triopathy.</p>                                                                                                                                                                                                                                                 |                | Indians         | Black African  | Glucose (mmol/l) | 15.80 ± 1.50             | 14.20 ± 1.50 | Growth hormone (ng/ml)   | 3.00 ± 0.76  | 1.76 ± 0.41     | Cortisol (µg/dl)                 | 16.20 ± 1.47   | 15.80 ± 1.40   | Cholesterol (mmol/l) | 5.17 ± 0.32    | 4.78 ± 0.26    | Triglyceride (mmol/l) | 2.81 ± 0.97    | 2.27 ± 0.83    | Creatinine (µg/dl) | 68.90 ± 4.10  | 79.40 ± 6.70  |               |
|------------------------------------|-----------------|---------------------------|-----------------------------------------------------------------------------------------------------------------------------------------------------------------------------------------------------------------------------------------------------------------------------------------------------------------------------------------------------------------------------------------------------------------------------------------------------------------------------------------------------------------|---------------------------------------------------|-----------------------------------------------------------------------------------------------|----------------------|------------------------------------------------------------------------------------------------------------------------------------------------------------------------------------------------------------------------------------------------------------------------------------------------------------------------------------------------------------------------------------------------------------------------------------------------------------------------------------------------------------------------------------------------------------------------------------------------------------------------------------------------------------------------------------------------------------------------------------------------------------------------------------------------------------------------------------------------------------------------------------------------------------------------------------------------------------------------------------------------------------------------------------------------------------------------------------------------------------------------------------------------------------------------------------------------------------------------------------|----------------|-----------------|----------------|------------------|--------------------------|--------------|--------------------------|--------------|-----------------|----------------------------------|----------------|----------------|----------------------|----------------|----------------|-----------------------|----------------|----------------|--------------------|---------------|---------------|---------------|
|                                    | Indians         | Black African             |                                                                                                                                                                                                                                                                                                                                                                                                                                                                                                                 |                                                   |                                                                                               |                      |                                                                                                                                                                                                                                                                                                                                                                                                                                                                                                                                                                                                                                                                                                                                                                                                                                                                                                                                                                                                                                                                                                                                                                                                                                    |                |                 |                |                  |                          |              |                          |              |                 |                                  |                |                |                      |                |                |                       |                |                |                    |               |               |               |
| Glucose (mmol/l)                   | 15.80 ± 1.50    | 14.20 ± 1.50              |                                                                                                                                                                                                                                                                                                                                                                                                                                                                                                                 |                                                   |                                                                                               |                      |                                                                                                                                                                                                                                                                                                                                                                                                                                                                                                                                                                                                                                                                                                                                                                                                                                                                                                                                                                                                                                                                                                                                                                                                                                    |                |                 |                |                  |                          |              |                          |              |                 |                                  |                |                |                      |                |                |                       |                |                |                    |               |               |               |
| Growth hormone (ng/ml)             | 3.00 ± 0.76     | 1.76 ± 0.41               |                                                                                                                                                                                                                                                                                                                                                                                                                                                                                                                 |                                                   |                                                                                               |                      |                                                                                                                                                                                                                                                                                                                                                                                                                                                                                                                                                                                                                                                                                                                                                                                                                                                                                                                                                                                                                                                                                                                                                                                                                                    |                |                 |                |                  |                          |              |                          |              |                 |                                  |                |                |                      |                |                |                       |                |                |                    |               |               |               |
| Cortisol (µg/dl)                   | 16.20 ± 1.47    | 15.80 ± 1.40              |                                                                                                                                                                                                                                                                                                                                                                                                                                                                                                                 |                                                   |                                                                                               |                      |                                                                                                                                                                                                                                                                                                                                                                                                                                                                                                                                                                                                                                                                                                                                                                                                                                                                                                                                                                                                                                                                                                                                                                                                                                    |                |                 |                |                  |                          |              |                          |              |                 |                                  |                |                |                      |                |                |                       |                |                |                    |               |               |               |
| Cholesterol (mmol/l)               | 5.17 ± 0.32     | 4.78 ± 0.26               |                                                                                                                                                                                                                                                                                                                                                                                                                                                                                                                 |                                                   |                                                                                               |                      |                                                                                                                                                                                                                                                                                                                                                                                                                                                                                                                                                                                                                                                                                                                                                                                                                                                                                                                                                                                                                                                                                                                                                                                                                                    |                |                 |                |                  |                          |              |                          |              |                 |                                  |                |                |                      |                |                |                       |                |                |                    |               |               |               |
| Triglyceride (mmol/l)              | 2.81 ± 0.97     | 2.27 ± 0.83               |                                                                                                                                                                                                                                                                                                                                                                                                                                                                                                                 |                                                   |                                                                                               |                      |                                                                                                                                                                                                                                                                                                                                                                                                                                                                                                                                                                                                                                                                                                                                                                                                                                                                                                                                                                                                                                                                                                                                                                                                                                    |                |                 |                |                  |                          |              |                          |              |                 |                                  |                |                |                      |                |                |                       |                |                |                    |               |               |               |
| Creatinine (µg/dl)                 | 68.90 ± 4.10    | 79.40 ± 6.70              |                                                                                                                                                                                                                                                                                                                                                                                                                                                                                                                 |                                                   |                                                                                               |                      |                                                                                                                                                                                                                                                                                                                                                                                                                                                                                                                                                                                                                                                                                                                                                                                                                                                                                                                                                                                                                                                                                                                                                                                                                                    |                |                 |                |                  |                          |              |                          |              |                 |                                  |                |                |                      |                |                |                       |                |                |                    |               |               |               |
| Ismail et al <sup>13</sup><br>2001 | Malaysia        | Cross Sectional study     | <p><b>Ethnicity</b><br/>3 groups: Indian, Malay and Chinese. Each ethnic group identified by appearance, language and religion.</p> <p><b>T1DM</b><br/>T1DM defined as acute symptoms associated with heavy ketonuria (&gt;3+) or ketoacidosis at diagnosis, or continuous treatment with insulin within 1 year of diagnosis.</p> <p><b>Method</b><br/>Patients recruited from 7 centres throughout Peninsular Malaysia. Blood taken for lipid levels, clinical history and physical examination performed.</p> | Indian: 154<br><br>Malay: 297<br><br>Chinese: 128 | Mean age (years)<br><br>All: 28.8<br><br>Indian: 29.1<br><br>Chinese: 29.8<br><br>Malay: 27.7 | June 1997- June 1998 | <p><b>Demographic Features</b></p> <table border="1"> <thead> <tr> <th></th> <th>Malay (n = 297)</th> <th>Chinese(n=128)</th> <th>Indian (n=154)</th> </tr> </thead> <tbody> <tr> <td>BMI (kg/m<sup>2</sup>)</td> <td>26.8 ± 4.9</td> <td>25.4 ± 4.5</td> <td>25.5 ± 4.3</td> </tr> <tr> <td rowspan="3">Waist-hip ratio</td> <td>A: 0.88 ± 0.06</td> <td>A: 0.88 ± 0.07</td> <td>A: 0.89 ± 0.06</td> </tr> <tr> <td>M: 0.91 ± 0.06</td> <td>M: 0.90 ± 0.06</td> <td>M: 0.93 ± 0.06</td> </tr> <tr> <td>F: 0.86 ± 0.06</td> <td>F: 0.85 ± 0.07</td> <td>F: 0.85 ± 0.06</td> </tr> <tr> <td>HbA1c (%)</td> <td>8.8 (8.6-9.1)</td> <td>8.0 (7.7-8.3)</td> <td>8.5 (8.2-8.8)</td> </tr> </tbody> </table> <p><b>Lipid Profiles (mmol/L, mean +/- SEM)</b></p> <p><b>Total Cholesterol</b> : Indians (5.74 +/- 1.25), Chinese (5.64 +/- 1.42), Malay (5.58 +/- 1.38)<br/> <b>LDL Cholesterol</b> : Indians (3.89 +/- 1.20), Chinese (3.52 +/- 1.22), Malay (3.48 +/- 1.12)<br/> <b>HDL Cholesterol</b> (mean[95% CI]) : Indians (1.28 [1.19-1.38]), Chinese (1.57 [1.48-1.67]), Malay (1.37 [1.28-1.46])<br/> <b>Triglycerides</b> (mean[95% CI]): Indians (1.02 [0.9-1.16]), Chinese (0.82 [0.74-0.91]), Malay (1.11 [0.99-1.23])</p> |                | Malay (n = 297) | Chinese(n=128) | Indian (n=154)   | BMI (kg/m <sup>2</sup> ) | 26.8 ± 4.9   | 25.4 ± 4.5               | 25.5 ± 4.3   | Waist-hip ratio | A: 0.88 ± 0.06                   | A: 0.88 ± 0.07 | A: 0.89 ± 0.06 | M: 0.91 ± 0.06       | M: 0.90 ± 0.06 | M: 0.93 ± 0.06 | F: 0.86 ± 0.06        | F: 0.85 ± 0.07 | F: 0.85 ± 0.06 | HbA1c (%)          | 8.8 (8.6-9.1) | 8.0 (7.7-8.3) | 8.5 (8.2-8.8) |
|                                    | Malay (n = 297) | Chinese(n=128)            | Indian (n=154)                                                                                                                                                                                                                                                                                                                                                                                                                                                                                                  |                                                   |                                                                                               |                      |                                                                                                                                                                                                                                                                                                                                                                                                                                                                                                                                                                                                                                                                                                                                                                                                                                                                                                                                                                                                                                                                                                                                                                                                                                    |                |                 |                |                  |                          |              |                          |              |                 |                                  |                |                |                      |                |                |                       |                |                |                    |               |               |               |
| BMI (kg/m <sup>2</sup> )           | 26.8 ± 4.9      | 25.4 ± 4.5                | 25.5 ± 4.3                                                                                                                                                                                                                                                                                                                                                                                                                                                                                                      |                                                   |                                                                                               |                      |                                                                                                                                                                                                                                                                                                                                                                                                                                                                                                                                                                                                                                                                                                                                                                                                                                                                                                                                                                                                                                                                                                                                                                                                                                    |                |                 |                |                  |                          |              |                          |              |                 |                                  |                |                |                      |                |                |                       |                |                |                    |               |               |               |
| Waist-hip ratio                    | A: 0.88 ± 0.06  | A: 0.88 ± 0.07            | A: 0.89 ± 0.06                                                                                                                                                                                                                                                                                                                                                                                                                                                                                                  |                                                   |                                                                                               |                      |                                                                                                                                                                                                                                                                                                                                                                                                                                                                                                                                                                                                                                                                                                                                                                                                                                                                                                                                                                                                                                                                                                                                                                                                                                    |                |                 |                |                  |                          |              |                          |              |                 |                                  |                |                |                      |                |                |                       |                |                |                    |               |               |               |
|                                    | M: 0.91 ± 0.06  | M: 0.90 ± 0.06            | M: 0.93 ± 0.06                                                                                                                                                                                                                                                                                                                                                                                                                                                                                                  |                                                   |                                                                                               |                      |                                                                                                                                                                                                                                                                                                                                                                                                                                                                                                                                                                                                                                                                                                                                                                                                                                                                                                                                                                                                                                                                                                                                                                                                                                    |                |                 |                |                  |                          |              |                          |              |                 |                                  |                |                |                      |                |                |                       |                |                |                    |               |               |               |
|                                    | F: 0.86 ± 0.06  | F: 0.85 ± 0.07            | F: 0.85 ± 0.06                                                                                                                                                                                                                                                                                                                                                                                                                                                                                                  |                                                   |                                                                                               |                      |                                                                                                                                                                                                                                                                                                                                                                                                                                                                                                                                                                                                                                                                                                                                                                                                                                                                                                                                                                                                                                                                                                                                                                                                                                    |                |                 |                |                  |                          |              |                          |              |                 |                                  |                |                |                      |                |                |                       |                |                |                    |               |               |               |
| HbA1c (%)                          | 8.8 (8.6-9.1)   | 8.0 (7.7-8.3)             | 8.5 (8.2-8.8)                                                                                                                                                                                                                                                                                                                                                                                                                                                                                                   |                                                   |                                                                                               |                      |                                                                                                                                                                                                                                                                                                                                                                                                                                                                                                                                                                                                                                                                                                                                                                                                                                                                                                                                                                                                                                                                                                                                                                                                                                    |                |                 |                |                  |                          |              |                          |              |                 |                                  |                |                |                      |                |                |                       |                |                |                    |               |               |               |
| Omar et al <sup>14</sup><br>1984   | South Africa    | Cross section al analysis | <p><b>Ethnicity</b><br/>Indians and Africans</p> <p><b>T1DM</b><br/>Classification of diabetes based on criteria by National Diabetes Data Group and WHO expert committee. T1DM patients had always depended on insulin for control of symptoms and prevention of basal ketosis. All patients diagnosed &lt;35 years of age</p>                                                                                                                                                                                 | African T1DM: 86<br><br>Indian T1DM: 40           | Mean age of onset (range)<br><br>African : 23.5 (1-35) yrs<br>Indian:                         | 2 year period        | <p><b>Clinical characteristics of T1DM patients</b></p> <table border="1"> <thead> <tr> <th>Characteristic</th> <th>Africans (n=86)</th> <th>Indians (n=40)</th> </tr> </thead> <tbody> <tr> <td>Male: Female</td> <td>21: 25</td> <td>17: 24</td> </tr> <tr> <td>Mean % ideal body weight</td> <td>106 (68-153)</td> <td>91 (71-136)</td> </tr> <tr> <td>Mean duration of disease (years)</td> <td>3.8 (1-27)</td> <td>5.4 (1-22)</td> </tr> <tr> <td>Mean age of onset</td> <td>23.5 (1-35)</td> <td>17 (1-35)</td> </tr> </tbody> </table>                                                                                                                                                                                                                                                                                                                                                                                                                                                                                                                                                                                                                                                                                      | Characteristic | Africans (n=86) | Indians (n=40) | Male: Female     | 21: 25                   | 17: 24       | Mean % ideal body weight | 106 (68-153) | 91 (71-136)     | Mean duration of disease (years) | 3.8 (1-27)     | 5.4 (1-22)     | Mean age of onset    | 23.5 (1-35)    | 17 (1-35)      |                       |                |                |                    |               |               |               |
| Characteristic                     | Africans (n=86) | Indians (n=40)            |                                                                                                                                                                                                                                                                                                                                                                                                                                                                                                                 |                                                   |                                                                                               |                      |                                                                                                                                                                                                                                                                                                                                                                                                                                                                                                                                                                                                                                                                                                                                                                                                                                                                                                                                                                                                                                                                                                                                                                                                                                    |                |                 |                |                  |                          |              |                          |              |                 |                                  |                |                |                      |                |                |                       |                |                |                    |               |               |               |
| Male: Female                       | 21: 25          | 17: 24                    |                                                                                                                                                                                                                                                                                                                                                                                                                                                                                                                 |                                                   |                                                                                               |                      |                                                                                                                                                                                                                                                                                                                                                                                                                                                                                                                                                                                                                                                                                                                                                                                                                                                                                                                                                                                                                                                                                                                                                                                                                                    |                |                 |                |                  |                          |              |                          |              |                 |                                  |                |                |                      |                |                |                       |                |                |                    |               |               |               |
| Mean % ideal body weight           | 106 (68-153)    | 91 (71-136)               |                                                                                                                                                                                                                                                                                                                                                                                                                                                                                                                 |                                                   |                                                                                               |                      |                                                                                                                                                                                                                                                                                                                                                                                                                                                                                                                                                                                                                                                                                                                                                                                                                                                                                                                                                                                                                                                                                                                                                                                                                                    |                |                 |                |                  |                          |              |                          |              |                 |                                  |                |                |                      |                |                |                       |                |                |                    |               |               |               |
| Mean duration of disease (years)   | 3.8 (1-27)      | 5.4 (1-22)                |                                                                                                                                                                                                                                                                                                                                                                                                                                                                                                                 |                                                   |                                                                                               |                      |                                                                                                                                                                                                                                                                                                                                                                                                                                                                                                                                                                                                                                                                                                                                                                                                                                                                                                                                                                                                                                                                                                                                                                                                                                    |                |                 |                |                  |                          |              |                          |              |                 |                                  |                |                |                      |                |                |                       |                |                |                    |               |               |               |
| Mean age of onset                  | 23.5 (1-35)     | 17 (1-35)                 |                                                                                                                                                                                                                                                                                                                                                                                                                                                                                                                 |                                                   |                                                                                               |                      |                                                                                                                                                                                                                                                                                                                                                                                                                                                                                                                                                                                                                                                                                                                                                                                                                                                                                                                                                                                                                                                                                                                                                                                                                                    |                |                 |                |                  |                          |              |                          |              |                 |                                  |                |                |                      |                |                |                       |                |                |                    |               |               |               |

| Papers assessing T1DM complications    |                       |                           |                                                                                                                                                                                                                                                                                                                                                                                                                                                                                                                                                                                                                                                                                        |                                                   |                                                                  |             |                                                                                                                                                                                                                                                                                                                                                                                                                                                                                                                                                                                                                                                                                                                                                                                                                                                                                                                                                                                                                                                                                                                                                                                                                                                                                                                                                                                                                                                                                                                                                                                                                                      |  |                       |                           |         |                                        |  |  |  |   |            |            |       |   |           |            |  |    |          |          |  |                              |  |  |  |     |           |            |       |                         |           |          |       |                             |         |          |       |                         |         |          |       |     |   |         |       |                              |  |  |  |             |           |            |       |            |           |            |        |             |           |            |       |                                  |  |  |  |  |           |            |  |            |           |            |       |           |            |            |  |
|----------------------------------------|-----------------------|---------------------------|----------------------------------------------------------------------------------------------------------------------------------------------------------------------------------------------------------------------------------------------------------------------------------------------------------------------------------------------------------------------------------------------------------------------------------------------------------------------------------------------------------------------------------------------------------------------------------------------------------------------------------------------------------------------------------------|---------------------------------------------------|------------------------------------------------------------------|-------------|--------------------------------------------------------------------------------------------------------------------------------------------------------------------------------------------------------------------------------------------------------------------------------------------------------------------------------------------------------------------------------------------------------------------------------------------------------------------------------------------------------------------------------------------------------------------------------------------------------------------------------------------------------------------------------------------------------------------------------------------------------------------------------------------------------------------------------------------------------------------------------------------------------------------------------------------------------------------------------------------------------------------------------------------------------------------------------------------------------------------------------------------------------------------------------------------------------------------------------------------------------------------------------------------------------------------------------------------------------------------------------------------------------------------------------------------------------------------------------------------------------------------------------------------------------------------------------------------------------------------------------------|--|-----------------------|---------------------------|---------|----------------------------------------|--|--|--|---|------------|------------|-------|---|-----------|------------|--|----|----------|----------|--|------------------------------|--|--|--|-----|-----------|------------|-------|-------------------------|-----------|----------|-------|-----------------------------|---------|----------|-------|-------------------------|---------|----------|-------|-----|---|---------|-------|------------------------------|--|--|--|-------------|-----------|------------|-------|------------|-----------|------------|--------|-------------|-----------|------------|-------|----------------------------------|--|--|--|--|-----------|------------|--|------------|-----------|------------|-------|-----------|------------|------------|--|
| Swerdlow et al <sup>15</sup> 2004      | UK                    | Prospective Cohort Study  | <p><b>Ethnicity</b><br/>Grouped into South Asians and non-South Asians. South Asians identified by computer algorithm (SANGRA) followed by a clerical check by an individual with expertise in this area.</p> <p><b>T1DM</b><br/>Patients with IDDM diagnosed &lt;30 years</p> <p><b>Method</b><br/>SMRs calculated, comparing mortality in the cohort to the corresponding mortality rates in the general population</p>                                                                                                                                                                                                                                                              | Non South Asian : 23, 326<br><br>South Asian: 424 | N/A                                                              | 1972 – 1999 | <p><b>Mortality</b><br/>The Standardised Mortality Ratios (SMR) for South Asian patients diagnosed &lt;30 years were 3.9(95% CI 2.0-6.9) in men and 10.1 (5.6-16.6) in women, and in the corresponding non-South Asians were 2.7 (2.6-2.9) in men and 4.0 (3.6-4.3) in women.</p>                                                                                                                                                                                                                                                                                                                                                                                                                                                                                                                                                                                                                                                                                                                                                                                                                                                                                                                                                                                                                                                                                                                                                                                                                                                                                                                                                    |  |                       |                           |         |                                        |  |  |  |   |            |            |       |   |           |            |  |    |          |          |  |                              |  |  |  |     |           |            |       |                         |           |          |       |                             |         |          |       |                         |         |          |       |     |   |         |       |                              |  |  |  |             |           |            |       |            |           |            |        |             |           |            |       |                                  |  |  |  |  |           |            |  |            |           |            |       |           |            |            |  |
| Mehta et al <sup>16</sup> 2011         | UK                    | Cross-sectional study     | <p><b>Ethnicity</b><br/>Ethnicity was categorised as SA or white European (WE) based on patient record documentation or by analysis of their name using a validated name recognition software 'Nam Pechan' supplemented by a visual inspection of surnames and forenames.</p> <p><b>T1DM</b><br/>Patient coded as having T1DM in the clinical database of a specialist outpatient diabetes clinic in Leicestershire, UK – no diagnostic criteria included</p> <p><b>Method</b><br/>Patient characteristics and other data were extracted from the clinical workstation (CWS), a clinical database of patients attending a specialist outpatient diabetes clinic in Leicestershire.</p> | WE: 1,169<br><br>SA: 163                          | <p><b>Mean age (years)</b></p> <p>WE: 45.3<br/><br/>SA: 41.9</p> | 2003-2005   | <table border="1"> <thead> <tr> <th></th> <th>South Asian (n = 163)</th> <th>White European (n = 1169)</th> <th>p Value</th> </tr> </thead> <tbody> <tr> <td colspan="4"><b>Number of comorbidities (n (%))</b></td> </tr> <tr> <td>0</td> <td>114 (69.9)</td> <td>878 (75.1)</td> <td>0.166</td> </tr> <tr> <td>1</td> <td>36 (22.1)</td> <td>235 (20.1)</td> <td></td> </tr> <tr> <td>≥2</td> <td>13 (8.0)</td> <td>56 (4.8)</td> <td></td> </tr> <tr> <td colspan="4"><b>Macrovascular (n (%))</b></td> </tr> <tr> <td>CVD</td> <td>25 (15.3)</td> <td>132 (11.3)</td> <td>0.133</td> </tr> <tr> <td>Ischaemic heart disease</td> <td>20 (12.3)</td> <td>97 (8.3)</td> <td>0.093</td> </tr> <tr> <td>Peripheral vascular disease</td> <td>3 (1.8)</td> <td>31 (2.7)</td> <td>0.790</td> </tr> <tr> <td>Cerebrovascular disease</td> <td>6 (3.7)</td> <td>21 (1.8)</td> <td>0.130</td> </tr> <tr> <td>TIA</td> <td>0</td> <td>2 (0.2)</td> <td>1.000</td> </tr> <tr> <td colspan="4"><b>Microvascular (n (%))</b></td> </tr> <tr> <td>Retinopathy</td> <td>63 (38.7)</td> <td>561 (48.0)</td> <td>0.025</td> </tr> <tr> <td>Neuropathy</td> <td>24 (14.7)</td> <td>325 (27.8)</td> <td>&lt;0.001</td> </tr> <tr> <td>Nephropathy</td> <td>22 (13.5)</td> <td>118 (10.1)</td> <td>0.184</td> </tr> <tr> <td colspan="4"><b>Glycaemic control (n (%))</b></td> </tr> <tr> <td></td> <td>(n = 163)</td> <td>(n = 1169)</td> <td></td> </tr> <tr> <td>HbA1C &lt; 7%</td> <td>19 (12.0)</td> <td>193 (17.0)</td> <td>0.113</td> </tr> <tr> <td>HbA1C ≥7%</td> <td>144 (88.0)</td> <td>976 (83.0)</td> <td></td> </tr> </tbody> </table> |  | South Asian (n = 163) | White European (n = 1169) | p Value | <b>Number of comorbidities (n (%))</b> |  |  |  | 0 | 114 (69.9) | 878 (75.1) | 0.166 | 1 | 36 (22.1) | 235 (20.1) |  | ≥2 | 13 (8.0) | 56 (4.8) |  | <b>Macrovascular (n (%))</b> |  |  |  | CVD | 25 (15.3) | 132 (11.3) | 0.133 | Ischaemic heart disease | 20 (12.3) | 97 (8.3) | 0.093 | Peripheral vascular disease | 3 (1.8) | 31 (2.7) | 0.790 | Cerebrovascular disease | 6 (3.7) | 21 (1.8) | 0.130 | TIA | 0 | 2 (0.2) | 1.000 | <b>Microvascular (n (%))</b> |  |  |  | Retinopathy | 63 (38.7) | 561 (48.0) | 0.025 | Neuropathy | 24 (14.7) | 325 (27.8) | <0.001 | Nephropathy | 22 (13.5) | 118 (10.1) | 0.184 | <b>Glycaemic control (n (%))</b> |  |  |  |  | (n = 163) | (n = 1169) |  | HbA1C < 7% | 19 (12.0) | 193 (17.0) | 0.113 | HbA1C ≥7% | 144 (88.0) | 976 (83.0) |  |
|                                        | South Asian (n = 163) | White European (n = 1169) | p Value                                                                                                                                                                                                                                                                                                                                                                                                                                                                                                                                                                                                                                                                                |                                                   |                                                                  |             |                                                                                                                                                                                                                                                                                                                                                                                                                                                                                                                                                                                                                                                                                                                                                                                                                                                                                                                                                                                                                                                                                                                                                                                                                                                                                                                                                                                                                                                                                                                                                                                                                                      |  |                       |                           |         |                                        |  |  |  |   |            |            |       |   |           |            |  |    |          |          |  |                              |  |  |  |     |           |            |       |                         |           |          |       |                             |         |          |       |                         |         |          |       |     |   |         |       |                              |  |  |  |             |           |            |       |            |           |            |        |             |           |            |       |                                  |  |  |  |  |           |            |  |            |           |            |       |           |            |            |  |
| <b>Number of comorbidities (n (%))</b> |                       |                           |                                                                                                                                                                                                                                                                                                                                                                                                                                                                                                                                                                                                                                                                                        |                                                   |                                                                  |             |                                                                                                                                                                                                                                                                                                                                                                                                                                                                                                                                                                                                                                                                                                                                                                                                                                                                                                                                                                                                                                                                                                                                                                                                                                                                                                                                                                                                                                                                                                                                                                                                                                      |  |                       |                           |         |                                        |  |  |  |   |            |            |       |   |           |            |  |    |          |          |  |                              |  |  |  |     |           |            |       |                         |           |          |       |                             |         |          |       |                         |         |          |       |     |   |         |       |                              |  |  |  |             |           |            |       |            |           |            |        |             |           |            |       |                                  |  |  |  |  |           |            |  |            |           |            |       |           |            |            |  |
| 0                                      | 114 (69.9)            | 878 (75.1)                | 0.166                                                                                                                                                                                                                                                                                                                                                                                                                                                                                                                                                                                                                                                                                  |                                                   |                                                                  |             |                                                                                                                                                                                                                                                                                                                                                                                                                                                                                                                                                                                                                                                                                                                                                                                                                                                                                                                                                                                                                                                                                                                                                                                                                                                                                                                                                                                                                                                                                                                                                                                                                                      |  |                       |                           |         |                                        |  |  |  |   |            |            |       |   |           |            |  |    |          |          |  |                              |  |  |  |     |           |            |       |                         |           |          |       |                             |         |          |       |                         |         |          |       |     |   |         |       |                              |  |  |  |             |           |            |       |            |           |            |        |             |           |            |       |                                  |  |  |  |  |           |            |  |            |           |            |       |           |            |            |  |
| 1                                      | 36 (22.1)             | 235 (20.1)                |                                                                                                                                                                                                                                                                                                                                                                                                                                                                                                                                                                                                                                                                                        |                                                   |                                                                  |             |                                                                                                                                                                                                                                                                                                                                                                                                                                                                                                                                                                                                                                                                                                                                                                                                                                                                                                                                                                                                                                                                                                                                                                                                                                                                                                                                                                                                                                                                                                                                                                                                                                      |  |                       |                           |         |                                        |  |  |  |   |            |            |       |   |           |            |  |    |          |          |  |                              |  |  |  |     |           |            |       |                         |           |          |       |                             |         |          |       |                         |         |          |       |     |   |         |       |                              |  |  |  |             |           |            |       |            |           |            |        |             |           |            |       |                                  |  |  |  |  |           |            |  |            |           |            |       |           |            |            |  |
| ≥2                                     | 13 (8.0)              | 56 (4.8)                  |                                                                                                                                                                                                                                                                                                                                                                                                                                                                                                                                                                                                                                                                                        |                                                   |                                                                  |             |                                                                                                                                                                                                                                                                                                                                                                                                                                                                                                                                                                                                                                                                                                                                                                                                                                                                                                                                                                                                                                                                                                                                                                                                                                                                                                                                                                                                                                                                                                                                                                                                                                      |  |                       |                           |         |                                        |  |  |  |   |            |            |       |   |           |            |  |    |          |          |  |                              |  |  |  |     |           |            |       |                         |           |          |       |                             |         |          |       |                         |         |          |       |     |   |         |       |                              |  |  |  |             |           |            |       |            |           |            |        |             |           |            |       |                                  |  |  |  |  |           |            |  |            |           |            |       |           |            |            |  |
| <b>Macrovascular (n (%))</b>           |                       |                           |                                                                                                                                                                                                                                                                                                                                                                                                                                                                                                                                                                                                                                                                                        |                                                   |                                                                  |             |                                                                                                                                                                                                                                                                                                                                                                                                                                                                                                                                                                                                                                                                                                                                                                                                                                                                                                                                                                                                                                                                                                                                                                                                                                                                                                                                                                                                                                                                                                                                                                                                                                      |  |                       |                           |         |                                        |  |  |  |   |            |            |       |   |           |            |  |    |          |          |  |                              |  |  |  |     |           |            |       |                         |           |          |       |                             |         |          |       |                         |         |          |       |     |   |         |       |                              |  |  |  |             |           |            |       |            |           |            |        |             |           |            |       |                                  |  |  |  |  |           |            |  |            |           |            |       |           |            |            |  |
| CVD                                    | 25 (15.3)             | 132 (11.3)                | 0.133                                                                                                                                                                                                                                                                                                                                                                                                                                                                                                                                                                                                                                                                                  |                                                   |                                                                  |             |                                                                                                                                                                                                                                                                                                                                                                                                                                                                                                                                                                                                                                                                                                                                                                                                                                                                                                                                                                                                                                                                                                                                                                                                                                                                                                                                                                                                                                                                                                                                                                                                                                      |  |                       |                           |         |                                        |  |  |  |   |            |            |       |   |           |            |  |    |          |          |  |                              |  |  |  |     |           |            |       |                         |           |          |       |                             |         |          |       |                         |         |          |       |     |   |         |       |                              |  |  |  |             |           |            |       |            |           |            |        |             |           |            |       |                                  |  |  |  |  |           |            |  |            |           |            |       |           |            |            |  |
| Ischaemic heart disease                | 20 (12.3)             | 97 (8.3)                  | 0.093                                                                                                                                                                                                                                                                                                                                                                                                                                                                                                                                                                                                                                                                                  |                                                   |                                                                  |             |                                                                                                                                                                                                                                                                                                                                                                                                                                                                                                                                                                                                                                                                                                                                                                                                                                                                                                                                                                                                                                                                                                                                                                                                                                                                                                                                                                                                                                                                                                                                                                                                                                      |  |                       |                           |         |                                        |  |  |  |   |            |            |       |   |           |            |  |    |          |          |  |                              |  |  |  |     |           |            |       |                         |           |          |       |                             |         |          |       |                         |         |          |       |     |   |         |       |                              |  |  |  |             |           |            |       |            |           |            |        |             |           |            |       |                                  |  |  |  |  |           |            |  |            |           |            |       |           |            |            |  |
| Peripheral vascular disease            | 3 (1.8)               | 31 (2.7)                  | 0.790                                                                                                                                                                                                                                                                                                                                                                                                                                                                                                                                                                                                                                                                                  |                                                   |                                                                  |             |                                                                                                                                                                                                                                                                                                                                                                                                                                                                                                                                                                                                                                                                                                                                                                                                                                                                                                                                                                                                                                                                                                                                                                                                                                                                                                                                                                                                                                                                                                                                                                                                                                      |  |                       |                           |         |                                        |  |  |  |   |            |            |       |   |           |            |  |    |          |          |  |                              |  |  |  |     |           |            |       |                         |           |          |       |                             |         |          |       |                         |         |          |       |     |   |         |       |                              |  |  |  |             |           |            |       |            |           |            |        |             |           |            |       |                                  |  |  |  |  |           |            |  |            |           |            |       |           |            |            |  |
| Cerebrovascular disease                | 6 (3.7)               | 21 (1.8)                  | 0.130                                                                                                                                                                                                                                                                                                                                                                                                                                                                                                                                                                                                                                                                                  |                                                   |                                                                  |             |                                                                                                                                                                                                                                                                                                                                                                                                                                                                                                                                                                                                                                                                                                                                                                                                                                                                                                                                                                                                                                                                                                                                                                                                                                                                                                                                                                                                                                                                                                                                                                                                                                      |  |                       |                           |         |                                        |  |  |  |   |            |            |       |   |           |            |  |    |          |          |  |                              |  |  |  |     |           |            |       |                         |           |          |       |                             |         |          |       |                         |         |          |       |     |   |         |       |                              |  |  |  |             |           |            |       |            |           |            |        |             |           |            |       |                                  |  |  |  |  |           |            |  |            |           |            |       |           |            |            |  |
| TIA                                    | 0                     | 2 (0.2)                   | 1.000                                                                                                                                                                                                                                                                                                                                                                                                                                                                                                                                                                                                                                                                                  |                                                   |                                                                  |             |                                                                                                                                                                                                                                                                                                                                                                                                                                                                                                                                                                                                                                                                                                                                                                                                                                                                                                                                                                                                                                                                                                                                                                                                                                                                                                                                                                                                                                                                                                                                                                                                                                      |  |                       |                           |         |                                        |  |  |  |   |            |            |       |   |           |            |  |    |          |          |  |                              |  |  |  |     |           |            |       |                         |           |          |       |                             |         |          |       |                         |         |          |       |     |   |         |       |                              |  |  |  |             |           |            |       |            |           |            |        |             |           |            |       |                                  |  |  |  |  |           |            |  |            |           |            |       |           |            |            |  |
| <b>Microvascular (n (%))</b>           |                       |                           |                                                                                                                                                                                                                                                                                                                                                                                                                                                                                                                                                                                                                                                                                        |                                                   |                                                                  |             |                                                                                                                                                                                                                                                                                                                                                                                                                                                                                                                                                                                                                                                                                                                                                                                                                                                                                                                                                                                                                                                                                                                                                                                                                                                                                                                                                                                                                                                                                                                                                                                                                                      |  |                       |                           |         |                                        |  |  |  |   |            |            |       |   |           |            |  |    |          |          |  |                              |  |  |  |     |           |            |       |                         |           |          |       |                             |         |          |       |                         |         |          |       |     |   |         |       |                              |  |  |  |             |           |            |       |            |           |            |        |             |           |            |       |                                  |  |  |  |  |           |            |  |            |           |            |       |           |            |            |  |
| Retinopathy                            | 63 (38.7)             | 561 (48.0)                | 0.025                                                                                                                                                                                                                                                                                                                                                                                                                                                                                                                                                                                                                                                                                  |                                                   |                                                                  |             |                                                                                                                                                                                                                                                                                                                                                                                                                                                                                                                                                                                                                                                                                                                                                                                                                                                                                                                                                                                                                                                                                                                                                                                                                                                                                                                                                                                                                                                                                                                                                                                                                                      |  |                       |                           |         |                                        |  |  |  |   |            |            |       |   |           |            |  |    |          |          |  |                              |  |  |  |     |           |            |       |                         |           |          |       |                             |         |          |       |                         |         |          |       |     |   |         |       |                              |  |  |  |             |           |            |       |            |           |            |        |             |           |            |       |                                  |  |  |  |  |           |            |  |            |           |            |       |           |            |            |  |
| Neuropathy                             | 24 (14.7)             | 325 (27.8)                | <0.001                                                                                                                                                                                                                                                                                                                                                                                                                                                                                                                                                                                                                                                                                 |                                                   |                                                                  |             |                                                                                                                                                                                                                                                                                                                                                                                                                                                                                                                                                                                                                                                                                                                                                                                                                                                                                                                                                                                                                                                                                                                                                                                                                                                                                                                                                                                                                                                                                                                                                                                                                                      |  |                       |                           |         |                                        |  |  |  |   |            |            |       |   |           |            |  |    |          |          |  |                              |  |  |  |     |           |            |       |                         |           |          |       |                             |         |          |       |                         |         |          |       |     |   |         |       |                              |  |  |  |             |           |            |       |            |           |            |        |             |           |            |       |                                  |  |  |  |  |           |            |  |            |           |            |       |           |            |            |  |
| Nephropathy                            | 22 (13.5)             | 118 (10.1)                | 0.184                                                                                                                                                                                                                                                                                                                                                                                                                                                                                                                                                                                                                                                                                  |                                                   |                                                                  |             |                                                                                                                                                                                                                                                                                                                                                                                                                                                                                                                                                                                                                                                                                                                                                                                                                                                                                                                                                                                                                                                                                                                                                                                                                                                                                                                                                                                                                                                                                                                                                                                                                                      |  |                       |                           |         |                                        |  |  |  |   |            |            |       |   |           |            |  |    |          |          |  |                              |  |  |  |     |           |            |       |                         |           |          |       |                             |         |          |       |                         |         |          |       |     |   |         |       |                              |  |  |  |             |           |            |       |            |           |            |        |             |           |            |       |                                  |  |  |  |  |           |            |  |            |           |            |       |           |            |            |  |
| <b>Glycaemic control (n (%))</b>       |                       |                           |                                                                                                                                                                                                                                                                                                                                                                                                                                                                                                                                                                                                                                                                                        |                                                   |                                                                  |             |                                                                                                                                                                                                                                                                                                                                                                                                                                                                                                                                                                                                                                                                                                                                                                                                                                                                                                                                                                                                                                                                                                                                                                                                                                                                                                                                                                                                                                                                                                                                                                                                                                      |  |                       |                           |         |                                        |  |  |  |   |            |            |       |   |           |            |  |    |          |          |  |                              |  |  |  |     |           |            |       |                         |           |          |       |                             |         |          |       |                         |         |          |       |     |   |         |       |                              |  |  |  |             |           |            |       |            |           |            |        |             |           |            |       |                                  |  |  |  |  |           |            |  |            |           |            |       |           |            |            |  |
|                                        | (n = 163)             | (n = 1169)                |                                                                                                                                                                                                                                                                                                                                                                                                                                                                                                                                                                                                                                                                                        |                                                   |                                                                  |             |                                                                                                                                                                                                                                                                                                                                                                                                                                                                                                                                                                                                                                                                                                                                                                                                                                                                                                                                                                                                                                                                                                                                                                                                                                                                                                                                                                                                                                                                                                                                                                                                                                      |  |                       |                           |         |                                        |  |  |  |   |            |            |       |   |           |            |  |    |          |          |  |                              |  |  |  |     |           |            |       |                         |           |          |       |                             |         |          |       |                         |         |          |       |     |   |         |       |                              |  |  |  |             |           |            |       |            |           |            |        |             |           |            |       |                                  |  |  |  |  |           |            |  |            |           |            |       |           |            |            |  |
| HbA1C < 7%                             | 19 (12.0)             | 193 (17.0)                | 0.113                                                                                                                                                                                                                                                                                                                                                                                                                                                                                                                                                                                                                                                                                  |                                                   |                                                                  |             |                                                                                                                                                                                                                                                                                                                                                                                                                                                                                                                                                                                                                                                                                                                                                                                                                                                                                                                                                                                                                                                                                                                                                                                                                                                                                                                                                                                                                                                                                                                                                                                                                                      |  |                       |                           |         |                                        |  |  |  |   |            |            |       |   |           |            |  |    |          |          |  |                              |  |  |  |     |           |            |       |                         |           |          |       |                             |         |          |       |                         |         |          |       |     |   |         |       |                              |  |  |  |             |           |            |       |            |           |            |        |             |           |            |       |                                  |  |  |  |  |           |            |  |            |           |            |       |           |            |            |  |
| HbA1C ≥7%                              | 144 (88.0)            | 976 (83.0)                |                                                                                                                                                                                                                                                                                                                                                                                                                                                                                                                                                                                                                                                                                        |                                                   |                                                                  |             |                                                                                                                                                                                                                                                                                                                                                                                                                                                                                                                                                                                                                                                                                                                                                                                                                                                                                                                                                                                                                                                                                                                                                                                                                                                                                                                                                                                                                                                                                                                                                                                                                                      |  |                       |                           |         |                                        |  |  |  |   |            |            |       |   |           |            |  |    |          |          |  |                              |  |  |  |     |           |            |       |                         |           |          |       |                             |         |          |       |                         |         |          |       |     |   |         |       |                              |  |  |  |             |           |            |       |            |           |            |        |             |           |            |       |                                  |  |  |  |  |           |            |  |            |           |            |       |           |            |            |  |
| Sivaprasad                             | UK                    | Cross-section             | <p><b>Ethnicity</b><br/>Self-reported ethnicity based on UK census</p>                                                                                                                                                                                                                                                                                                                                                                                                                                                                                                                                                                                                                 | WE: 2,628                                         | Mean age of                                                      | 2008-2009   |                                                                                                                                                                                                                                                                                                                                                                                                                                                                                                                                                                                                                                                                                                                                                                                                                                                                                                                                                                                                                                                                                                                                                                                                                                                                                                                                                                                                                                                                                                                                                                                                                                      |  |                       |                           |         |                                        |  |  |  |   |            |            |       |   |           |            |  |    |          |          |  |                              |  |  |  |     |           |            |       |                         |           |          |       |                             |         |          |       |                         |         |          |       |     |   |         |       |                              |  |  |  |             |           |            |       |            |           |            |        |             |           |            |       |                                  |  |  |  |  |           |            |  |            |           |            |       |           |            |            |  |

1  
2  
3  
4  
5  
6  
7  
8  
9  
10  
11  
12  
13  
14  
15  
16  
17  
18  
19  
20  
21  
22  
23  
24  
25  
26  
27  
28  
29  
30  
31  
32  
33  
34  
35  
36  
37  
38  
39  
40  
41  
42  
43  
44  
45  
46  
47  
48  
49

|                                           |                          |                                                 |                                                                                                                                                                                                                                                                                                                                                                                                                                              |                                                                            |                                                                             |               |                                                                                                                                                                                                                                                                                                                                                                                                                                                                                                                                                                                                                                                                                                                                                                                                                                                                                                                                                                                                                                                                                                                                                                                                                                                                                                                                                                                                                                                                                                                                                                                                                                                                           |                                  |                          |                                                |                                 |  |  |                       |             |                    |         |            |                          |                             |                          |                             |                             |      |      |                 |            |                    |         |           |                  |             |           |                   |                    |  |  |                 |           |                |         |            |                  |             |           |                  |                                |  |  |                 |            |                   |         |           |                   |             |           |                   |
|-------------------------------------------|--------------------------|-------------------------------------------------|----------------------------------------------------------------------------------------------------------------------------------------------------------------------------------------------------------------------------------------------------------------------------------------------------------------------------------------------------------------------------------------------------------------------------------------------|----------------------------------------------------------------------------|-----------------------------------------------------------------------------|---------------|---------------------------------------------------------------------------------------------------------------------------------------------------------------------------------------------------------------------------------------------------------------------------------------------------------------------------------------------------------------------------------------------------------------------------------------------------------------------------------------------------------------------------------------------------------------------------------------------------------------------------------------------------------------------------------------------------------------------------------------------------------------------------------------------------------------------------------------------------------------------------------------------------------------------------------------------------------------------------------------------------------------------------------------------------------------------------------------------------------------------------------------------------------------------------------------------------------------------------------------------------------------------------------------------------------------------------------------------------------------------------------------------------------------------------------------------------------------------------------------------------------------------------------------------------------------------------------------------------------------------------------------------------------------------------|----------------------------------|--------------------------|------------------------------------------------|---------------------------------|--|--|-----------------------|-------------|--------------------|---------|------------|--------------------------|-----------------------------|--------------------------|-----------------------------|-----------------------------|------|------|-----------------|------------|--------------------|---------|-----------|------------------|-------------|-----------|-------------------|--------------------|--|--|-----------------|-----------|----------------|---------|------------|------------------|-------------|-----------|------------------|--------------------------------|--|--|-----------------|------------|-------------------|---------|-----------|-------------------|-------------|-----------|-------------------|
| et al <sup>17</sup><br>2012               |                          | al<br>study                                     | standard (Census 2001): categorised as 'White European', 'African', 'South Asian', 'Mixed', 'other ethnic group' and 'not known'.<br><br><b>T1DM</b><br>Patients coded as T1DM in the database of the local DR screening service – no diagnostic criteria included<br><br><b>Method</b><br>To assess ethnic variations of the prevalence of DR and visual impairment in two multi-racial cohorts in the UK (Yorkshire and South East London) | African:<br>344<br><br>SA: 120                                             | T1DM<br>popula<br>tion:<br><br>39.4<br>yrs                                  |               | <table border="0"> <tr> <td><b>Ethnic group</b></td> <td><b>Prevalence: N (%)</b></td> <td><b>Age-standardised prevalence: % (95% CI)</b></td> </tr> <tr> <td colspan="3"><b>Any diabetic retinopathy</b></td> </tr> <tr> <td>White Europeans</td> <td>1446 (55.0)</td> <td>55.0 (53.2, 56.9)</td> </tr> <tr> <td>African</td> <td>154 (44.8)</td> <td>42.8 (37.3, 48.3)</td> </tr> <tr> <td>South Asian</td> <td>64 (53.3)</td> <td>54.0 (44.8, 63.2)</td> </tr> <tr> <td colspan="3"><b>Any maculopathy (M1)</b></td> </tr> <tr> <td>White Europeans</td> <td>371 (14.1)</td> <td>14.1 (12..8, 15.4)</td> </tr> <tr> <td>African</td> <td>47 (13.7)</td> <td>13.1 (9.4, 16.8)</td> </tr> <tr> <td>South Asian</td> <td>17 (14.2)</td> <td>16.6 (10.0, 23,2)</td> </tr> <tr> <td colspan="3"><b>CSMO (M1P1)</b></td> </tr> <tr> <td>White Europeans</td> <td>171 (6.5)</td> <td>6.5 (5.6, 7.4)</td> </tr> <tr> <td>African</td> <td>35 (10.20)</td> <td>10.0 (6.7, 13.3)</td> </tr> <tr> <td>South Asian</td> <td>12 (10.0)</td> <td>11.2 (5.4, 16.9)</td> </tr> <tr> <td colspan="3"><b>STDR (R2 or R3 or M1P1)</b></td> </tr> <tr> <td>White Europeans</td> <td>318 (12.1)</td> <td>12.1 (10.9, 13.3)</td> </tr> <tr> <td>African</td> <td>53 (15.4)</td> <td>15.9 (11.8, 20.0)</td> </tr> <tr> <td>South Asian</td> <td>19 (15.8)</td> <td>17.5 (10.6, 24.3)</td> </tr> </table> <p>CSMO- clinically significant macular oedema; M1- maculopathy P1- macular laser; STDR- sight threatening diabetic retinopathy; R1- mild to moderate non-proliferative diabetic retinopathy; R2- pre-proliferative diabetic retinopathy; R3- Proliferative diabetic retinopathy</p> | <b>Ethnic group</b>              | <b>Prevalence: N (%)</b> | <b>Age-standardised prevalence: % (95% CI)</b> | <b>Any diabetic retinopathy</b> |  |  | White Europeans       | 1446 (55.0) | 55.0 (53.2, 56.9)  | African | 154 (44.8) | 42.8 (37.3, 48.3)        | South Asian                 | 64 (53.3)                | 54.0 (44.8, 63.2)           | <b>Any maculopathy (M1)</b> |      |      | White Europeans | 371 (14.1) | 14.1 (12..8, 15.4) | African | 47 (13.7) | 13.1 (9.4, 16.8) | South Asian | 17 (14.2) | 16.6 (10.0, 23,2) | <b>CSMO (M1P1)</b> |  |  | White Europeans | 171 (6.5) | 6.5 (5.6, 7.4) | African | 35 (10.20) | 10.0 (6.7, 13.3) | South Asian | 12 (10.0) | 11.2 (5.4, 16.9) | <b>STDR (R2 or R3 or M1P1)</b> |  |  | White Europeans | 318 (12.1) | 12.1 (10.9, 13.3) | African | 53 (15.4) | 15.9 (11.8, 20.0) | South Asian | 19 (15.8) | 17.5 (10.6, 24.3) |
| <b>Ethnic group</b>                       | <b>Prevalence: N (%)</b> | <b>Age-standardised prevalence: % (95% CI)</b>  |                                                                                                                                                                                                                                                                                                                                                                                                                                              |                                                                            |                                                                             |               |                                                                                                                                                                                                                                                                                                                                                                                                                                                                                                                                                                                                                                                                                                                                                                                                                                                                                                                                                                                                                                                                                                                                                                                                                                                                                                                                                                                                                                                                                                                                                                                                                                                                           |                                  |                          |                                                |                                 |  |  |                       |             |                    |         |            |                          |                             |                          |                             |                             |      |      |                 |            |                    |         |           |                  |             |           |                   |                    |  |  |                 |           |                |         |            |                  |             |           |                  |                                |  |  |                 |            |                   |         |           |                   |             |           |                   |
| <b>Any diabetic retinopathy</b>           |                          |                                                 |                                                                                                                                                                                                                                                                                                                                                                                                                                              |                                                                            |                                                                             |               |                                                                                                                                                                                                                                                                                                                                                                                                                                                                                                                                                                                                                                                                                                                                                                                                                                                                                                                                                                                                                                                                                                                                                                                                                                                                                                                                                                                                                                                                                                                                                                                                                                                                           |                                  |                          |                                                |                                 |  |  |                       |             |                    |         |            |                          |                             |                          |                             |                             |      |      |                 |            |                    |         |           |                  |             |           |                   |                    |  |  |                 |           |                |         |            |                  |             |           |                  |                                |  |  |                 |            |                   |         |           |                   |             |           |                   |
| White Europeans                           | 1446 (55.0)              | 55.0 (53.2, 56.9)                               |                                                                                                                                                                                                                                                                                                                                                                                                                                              |                                                                            |                                                                             |               |                                                                                                                                                                                                                                                                                                                                                                                                                                                                                                                                                                                                                                                                                                                                                                                                                                                                                                                                                                                                                                                                                                                                                                                                                                                                                                                                                                                                                                                                                                                                                                                                                                                                           |                                  |                          |                                                |                                 |  |  |                       |             |                    |         |            |                          |                             |                          |                             |                             |      |      |                 |            |                    |         |           |                  |             |           |                   |                    |  |  |                 |           |                |         |            |                  |             |           |                  |                                |  |  |                 |            |                   |         |           |                   |             |           |                   |
| African                                   | 154 (44.8)               | 42.8 (37.3, 48.3)                               |                                                                                                                                                                                                                                                                                                                                                                                                                                              |                                                                            |                                                                             |               |                                                                                                                                                                                                                                                                                                                                                                                                                                                                                                                                                                                                                                                                                                                                                                                                                                                                                                                                                                                                                                                                                                                                                                                                                                                                                                                                                                                                                                                                                                                                                                                                                                                                           |                                  |                          |                                                |                                 |  |  |                       |             |                    |         |            |                          |                             |                          |                             |                             |      |      |                 |            |                    |         |           |                  |             |           |                   |                    |  |  |                 |           |                |         |            |                  |             |           |                  |                                |  |  |                 |            |                   |         |           |                   |             |           |                   |
| South Asian                               | 64 (53.3)                | 54.0 (44.8, 63.2)                               |                                                                                                                                                                                                                                                                                                                                                                                                                                              |                                                                            |                                                                             |               |                                                                                                                                                                                                                                                                                                                                                                                                                                                                                                                                                                                                                                                                                                                                                                                                                                                                                                                                                                                                                                                                                                                                                                                                                                                                                                                                                                                                                                                                                                                                                                                                                                                                           |                                  |                          |                                                |                                 |  |  |                       |             |                    |         |            |                          |                             |                          |                             |                             |      |      |                 |            |                    |         |           |                  |             |           |                   |                    |  |  |                 |           |                |         |            |                  |             |           |                  |                                |  |  |                 |            |                   |         |           |                   |             |           |                   |
| <b>Any maculopathy (M1)</b>               |                          |                                                 |                                                                                                                                                                                                                                                                                                                                                                                                                                              |                                                                            |                                                                             |               |                                                                                                                                                                                                                                                                                                                                                                                                                                                                                                                                                                                                                                                                                                                                                                                                                                                                                                                                                                                                                                                                                                                                                                                                                                                                                                                                                                                                                                                                                                                                                                                                                                                                           |                                  |                          |                                                |                                 |  |  |                       |             |                    |         |            |                          |                             |                          |                             |                             |      |      |                 |            |                    |         |           |                  |             |           |                   |                    |  |  |                 |           |                |         |            |                  |             |           |                  |                                |  |  |                 |            |                   |         |           |                   |             |           |                   |
| White Europeans                           | 371 (14.1)               | 14.1 (12..8, 15.4)                              |                                                                                                                                                                                                                                                                                                                                                                                                                                              |                                                                            |                                                                             |               |                                                                                                                                                                                                                                                                                                                                                                                                                                                                                                                                                                                                                                                                                                                                                                                                                                                                                                                                                                                                                                                                                                                                                                                                                                                                                                                                                                                                                                                                                                                                                                                                                                                                           |                                  |                          |                                                |                                 |  |  |                       |             |                    |         |            |                          |                             |                          |                             |                             |      |      |                 |            |                    |         |           |                  |             |           |                   |                    |  |  |                 |           |                |         |            |                  |             |           |                  |                                |  |  |                 |            |                   |         |           |                   |             |           |                   |
| African                                   | 47 (13.7)                | 13.1 (9.4, 16.8)                                |                                                                                                                                                                                                                                                                                                                                                                                                                                              |                                                                            |                                                                             |               |                                                                                                                                                                                                                                                                                                                                                                                                                                                                                                                                                                                                                                                                                                                                                                                                                                                                                                                                                                                                                                                                                                                                                                                                                                                                                                                                                                                                                                                                                                                                                                                                                                                                           |                                  |                          |                                                |                                 |  |  |                       |             |                    |         |            |                          |                             |                          |                             |                             |      |      |                 |            |                    |         |           |                  |             |           |                   |                    |  |  |                 |           |                |         |            |                  |             |           |                  |                                |  |  |                 |            |                   |         |           |                   |             |           |                   |
| South Asian                               | 17 (14.2)                | 16.6 (10.0, 23,2)                               |                                                                                                                                                                                                                                                                                                                                                                                                                                              |                                                                            |                                                                             |               |                                                                                                                                                                                                                                                                                                                                                                                                                                                                                                                                                                                                                                                                                                                                                                                                                                                                                                                                                                                                                                                                                                                                                                                                                                                                                                                                                                                                                                                                                                                                                                                                                                                                           |                                  |                          |                                                |                                 |  |  |                       |             |                    |         |            |                          |                             |                          |                             |                             |      |      |                 |            |                    |         |           |                  |             |           |                   |                    |  |  |                 |           |                |         |            |                  |             |           |                  |                                |  |  |                 |            |                   |         |           |                   |             |           |                   |
| <b>CSMO (M1P1)</b>                        |                          |                                                 |                                                                                                                                                                                                                                                                                                                                                                                                                                              |                                                                            |                                                                             |               |                                                                                                                                                                                                                                                                                                                                                                                                                                                                                                                                                                                                                                                                                                                                                                                                                                                                                                                                                                                                                                                                                                                                                                                                                                                                                                                                                                                                                                                                                                                                                                                                                                                                           |                                  |                          |                                                |                                 |  |  |                       |             |                    |         |            |                          |                             |                          |                             |                             |      |      |                 |            |                    |         |           |                  |             |           |                   |                    |  |  |                 |           |                |         |            |                  |             |           |                  |                                |  |  |                 |            |                   |         |           |                   |             |           |                   |
| White Europeans                           | 171 (6.5)                | 6.5 (5.6, 7.4)                                  |                                                                                                                                                                                                                                                                                                                                                                                                                                              |                                                                            |                                                                             |               |                                                                                                                                                                                                                                                                                                                                                                                                                                                                                                                                                                                                                                                                                                                                                                                                                                                                                                                                                                                                                                                                                                                                                                                                                                                                                                                                                                                                                                                                                                                                                                                                                                                                           |                                  |                          |                                                |                                 |  |  |                       |             |                    |         |            |                          |                             |                          |                             |                             |      |      |                 |            |                    |         |           |                  |             |           |                   |                    |  |  |                 |           |                |         |            |                  |             |           |                  |                                |  |  |                 |            |                   |         |           |                   |             |           |                   |
| African                                   | 35 (10.20)               | 10.0 (6.7, 13.3)                                |                                                                                                                                                                                                                                                                                                                                                                                                                                              |                                                                            |                                                                             |               |                                                                                                                                                                                                                                                                                                                                                                                                                                                                                                                                                                                                                                                                                                                                                                                                                                                                                                                                                                                                                                                                                                                                                                                                                                                                                                                                                                                                                                                                                                                                                                                                                                                                           |                                  |                          |                                                |                                 |  |  |                       |             |                    |         |            |                          |                             |                          |                             |                             |      |      |                 |            |                    |         |           |                  |             |           |                   |                    |  |  |                 |           |                |         |            |                  |             |           |                  |                                |  |  |                 |            |                   |         |           |                   |             |           |                   |
| South Asian                               | 12 (10.0)                | 11.2 (5.4, 16.9)                                |                                                                                                                                                                                                                                                                                                                                                                                                                                              |                                                                            |                                                                             |               |                                                                                                                                                                                                                                                                                                                                                                                                                                                                                                                                                                                                                                                                                                                                                                                                                                                                                                                                                                                                                                                                                                                                                                                                                                                                                                                                                                                                                                                                                                                                                                                                                                                                           |                                  |                          |                                                |                                 |  |  |                       |             |                    |         |            |                          |                             |                          |                             |                             |      |      |                 |            |                    |         |           |                  |             |           |                   |                    |  |  |                 |           |                |         |            |                  |             |           |                  |                                |  |  |                 |            |                   |         |           |                   |             |           |                   |
| <b>STDR (R2 or R3 or M1P1)</b>            |                          |                                                 |                                                                                                                                                                                                                                                                                                                                                                                                                                              |                                                                            |                                                                             |               |                                                                                                                                                                                                                                                                                                                                                                                                                                                                                                                                                                                                                                                                                                                                                                                                                                                                                                                                                                                                                                                                                                                                                                                                                                                                                                                                                                                                                                                                                                                                                                                                                                                                           |                                  |                          |                                                |                                 |  |  |                       |             |                    |         |            |                          |                             |                          |                             |                             |      |      |                 |            |                    |         |           |                  |             |           |                   |                    |  |  |                 |           |                |         |            |                  |             |           |                  |                                |  |  |                 |            |                   |         |           |                   |             |           |                   |
| White Europeans                           | 318 (12.1)               | 12.1 (10.9, 13.3)                               |                                                                                                                                                                                                                                                                                                                                                                                                                                              |                                                                            |                                                                             |               |                                                                                                                                                                                                                                                                                                                                                                                                                                                                                                                                                                                                                                                                                                                                                                                                                                                                                                                                                                                                                                                                                                                                                                                                                                                                                                                                                                                                                                                                                                                                                                                                                                                                           |                                  |                          |                                                |                                 |  |  |                       |             |                    |         |            |                          |                             |                          |                             |                             |      |      |                 |            |                    |         |           |                  |             |           |                   |                    |  |  |                 |           |                |         |            |                  |             |           |                  |                                |  |  |                 |            |                   |         |           |                   |             |           |                   |
| African                                   | 53 (15.4)                | 15.9 (11.8, 20.0)                               |                                                                                                                                                                                                                                                                                                                                                                                                                                              |                                                                            |                                                                             |               |                                                                                                                                                                                                                                                                                                                                                                                                                                                                                                                                                                                                                                                                                                                                                                                                                                                                                                                                                                                                                                                                                                                                                                                                                                                                                                                                                                                                                                                                                                                                                                                                                                                                           |                                  |                          |                                                |                                 |  |  |                       |             |                    |         |            |                          |                             |                          |                             |                             |      |      |                 |            |                    |         |           |                  |             |           |                   |                    |  |  |                 |           |                |         |            |                  |             |           |                  |                                |  |  |                 |            |                   |         |           |                   |             |           |                   |
| South Asian                               | 19 (15.8)                | 17.5 (10.6, 24.3)                               |                                                                                                                                                                                                                                                                                                                                                                                                                                              |                                                                            |                                                                             |               |                                                                                                                                                                                                                                                                                                                                                                                                                                                                                                                                                                                                                                                                                                                                                                                                                                                                                                                                                                                                                                                                                                                                                                                                                                                                                                                                                                                                                                                                                                                                                                                                                                                                           |                                  |                          |                                                |                                 |  |  |                       |             |                    |         |            |                          |                             |                          |                             |                             |      |      |                 |            |                    |         |           |                  |             |           |                   |                    |  |  |                 |           |                |         |            |                  |             |           |                  |                                |  |  |                 |            |                   |         |           |                   |             |           |                   |
| Thoma<br>s et<br>al <sup>18</sup><br>2012 | Sout<br>h<br>Afric<br>a  | Retros<br>pective<br>observ<br>ational<br>study | <b>Ethnicity</b><br>Caucasian, Indigenous African, Asian and mixed race.<br><br><b>T1DM</b><br>Classified as having T1DM on clinical assessment according to the American Diabetes Association classification of diabetes                                                                                                                                                                                                                    | Caucasia<br>n: 1247<br><br>Indigeno<br>us<br>African:<br>117<br><br>Asian: | Mean<br>age<br>(yrs)<br>Caucasi<br>an:<br>35.7<br>Indigen<br>ous<br>African | 2001-<br>2010 | <table border="0"> <tr> <td colspan="5"><b>Diabetic Retinopathy (DR)</b></td> </tr> <tr> <td></td> <td colspan="2"><b>Any DR (n=541)</b></td> <td colspan="2"><b>RDR (n=142)</b></td> </tr> <tr> <td></td> <td><b>Crude OR (95% CI)</b></td> <td><b>Adjusted OR (95% CI)</b></td> <td><b>Crude OR (95% CI)</b></td> <td><b>Adjusted OR (95% CI)</b></td> </tr> <tr> <td><b>Caucasian (1,247)</b></td> <td>1.00</td> <td>1.00</td> <td>1.00</td> <td>1.00</td> </tr> </table>                                                                                                                                                                                                                                                                                                                                                                                                                                                                                                                                                                                                                                                                                                                                                                                                                                                                                                                                                                                                                                                                                                                                                                                              | <b>Diabetic Retinopathy (DR)</b> |                          |                                                |                                 |  |  | <b>Any DR (n=541)</b> |             | <b>RDR (n=142)</b> |         |            | <b>Crude OR (95% CI)</b> | <b>Adjusted OR (95% CI)</b> | <b>Crude OR (95% CI)</b> | <b>Adjusted OR (95% CI)</b> | <b>Caucasian (1,247)</b>    | 1.00 | 1.00 | 1.00            | 1.00       |                    |         |           |                  |             |           |                   |                    |  |  |                 |           |                |         |            |                  |             |           |                  |                                |  |  |                 |            |                   |         |           |                   |             |           |                   |
| <b>Diabetic Retinopathy (DR)</b>          |                          |                                                 |                                                                                                                                                                                                                                                                                                                                                                                                                                              |                                                                            |                                                                             |               |                                                                                                                                                                                                                                                                                                                                                                                                                                                                                                                                                                                                                                                                                                                                                                                                                                                                                                                                                                                                                                                                                                                                                                                                                                                                                                                                                                                                                                                                                                                                                                                                                                                                           |                                  |                          |                                                |                                 |  |  |                       |             |                    |         |            |                          |                             |                          |                             |                             |      |      |                 |            |                    |         |           |                  |             |           |                   |                    |  |  |                 |           |                |         |            |                  |             |           |                  |                                |  |  |                 |            |                   |         |           |                   |             |           |                   |
|                                           | <b>Any DR (n=541)</b>    |                                                 | <b>RDR (n=142)</b>                                                                                                                                                                                                                                                                                                                                                                                                                           |                                                                            |                                                                             |               |                                                                                                                                                                                                                                                                                                                                                                                                                                                                                                                                                                                                                                                                                                                                                                                                                                                                                                                                                                                                                                                                                                                                                                                                                                                                                                                                                                                                                                                                                                                                                                                                                                                                           |                                  |                          |                                                |                                 |  |  |                       |             |                    |         |            |                          |                             |                          |                             |                             |      |      |                 |            |                    |         |           |                  |             |           |                   |                    |  |  |                 |           |                |         |            |                  |             |           |                  |                                |  |  |                 |            |                   |         |           |                   |             |           |                   |
|                                           | <b>Crude OR (95% CI)</b> | <b>Adjusted OR (95% CI)</b>                     | <b>Crude OR (95% CI)</b>                                                                                                                                                                                                                                                                                                                                                                                                                     | <b>Adjusted OR (95% CI)</b>                                                |                                                                             |               |                                                                                                                                                                                                                                                                                                                                                                                                                                                                                                                                                                                                                                                                                                                                                                                                                                                                                                                                                                                                                                                                                                                                                                                                                                                                                                                                                                                                                                                                                                                                                                                                                                                                           |                                  |                          |                                                |                                 |  |  |                       |             |                    |         |            |                          |                             |                          |                             |                             |      |      |                 |            |                    |         |           |                  |             |           |                   |                    |  |  |                 |           |                |         |            |                  |             |           |                  |                                |  |  |                 |            |                   |         |           |                   |             |           |                   |
| <b>Caucasian (1,247)</b>                  | 1.00                     | 1.00                                            | 1.00                                                                                                                                                                                                                                                                                                                                                                                                                                         | 1.00                                                                       |                                                                             |               |                                                                                                                                                                                                                                                                                                                                                                                                                                                                                                                                                                                                                                                                                                                                                                                                                                                                                                                                                                                                                                                                                                                                                                                                                                                                                                                                                                                                                                                                                                                                                                                                                                                                           |                                  |                          |                                                |                                 |  |  |                       |             |                    |         |            |                          |                             |                          |                             |                             |      |      |                 |            |                    |         |           |                  |             |           |                   |                    |  |  |                 |           |                |         |            |                  |             |           |                  |                                |  |  |                 |            |                   |         |           |                   |             |           |                   |

1  
2  
3  
4  
5  
6  
7  
8  
9  
10  
11  
12  
13  
14  
15  
16  
17  
18  
19  
20  
21  
22  
23  
24  
25  
26  
27  
28  
29  
30  
31  
32  
33  
34  
35  
36  
37  
38  
39  
40  
41  
42  
43  
44  
45  
46  
47  
48  
49

|                               |              |                          |                                                                                                                                                                                                                                                                                                                                      |                                      |                                                                 |               |                                        |                      |                  |                  |                  |
|-------------------------------|--------------|--------------------------|--------------------------------------------------------------------------------------------------------------------------------------------------------------------------------------------------------------------------------------------------------------------------------------------------------------------------------------|--------------------------------------|-----------------------------------------------------------------|---------------|----------------------------------------|----------------------|------------------|------------------|------------------|
|                               |              |                          | <b>Method</b><br>Retinal photography was conducted using a non-mydratic digital camera without mydriasis and graded by one of three senior graders.                                                                                                                                                                                  | 118<br><br>Mixed race: 49            | : 36.3<br>Asian: 32.2<br>Mixed race: 32.6                       |               | <b>Indigenous African (117)</b>        | 0.71 (0.46-1.09)     | 1.72 (1.00-2.97) | 0.95 (0.49-1.84) | 3.40 (1.40-8.26) |
|                               |              |                          |                                                                                                                                                                                                                                                                                                                                      |                                      |                                                                 |               | <b>Asian (118)</b>                     | 1.10 (0.74-1.63)     | 2.02 (1.23-3.29) | 1.05 (0.54-2.04) | 2.07 (0.90-4.75) |
|                               |              |                          |                                                                                                                                                                                                                                                                                                                                      |                                      |                                                                 |               | <b>Mixed race (49)</b>                 | 1.01 (0.56-1.84)     | 1.29 (0.62-2.69) | 1.10(0.42-2.88)  | 1.06 (0.36-3.18) |
| Omar et al <sup>19</sup> 1984 | South Africa | Cross-sectional analysis | <b>Ethnicity</b><br>2 groups: Indians and Black African.<br><br><b>T1DM</b><br>Patients with onset of IDDM <35 years at King Edward Hospital in Durban. Diagnosis of IDDM based on the criteria recommended by WHO.<br><br><b>Method</b><br>Both case records obtained and a physical examination performed to assess complications. | Black African: 92<br><br>Indians: 41 | Mean age at onset (yrs)<br><br>Blacks: 17<br><br>Indians : 23.5 | Not mentioned | <b>Complications</b>                   | <b>Black African</b> | <b>Indians</b>   | <b>Total</b>     |                  |
|                               |              |                          |                                                                                                                                                                                                                                                                                                                                      |                                      |                                                                 |               | <b>Keto-acidosis</b>                   | 53 (58%)             | 22 (54%)         | 75 (56%)         |                  |
|                               |              |                          |                                                                                                                                                                                                                                                                                                                                      |                                      |                                                                 |               | <b>Neuropathy peripheral autonomic</b> | 20 (22%)             | 13 (32%)         | 33 (25%)         |                  |
|                               |              |                          |                                                                                                                                                                                                                                                                                                                                      |                                      |                                                                 |               | <b>Retinopathy</b>                     | 4 (4%)               | 2 (5%)           | 6 (5%)           |                  |
|                               |              |                          |                                                                                                                                                                                                                                                                                                                                      |                                      |                                                                 |               | <b>Nephropathy</b>                     | 13 (14%)             | 9 (22%)          | 22 (17%)         |                  |
|                               |              |                          |                                                                                                                                                                                                                                                                                                                                      |                                      |                                                                 |               | <b>Triopathy</b>                       | 3 (3%)               | 3 (7%)           | 6 (5%)           |                  |
|                               |              |                          |                                                                                                                                                                                                                                                                                                                                      |                                      |                                                                 |               | <b>Ischaemic heart disease</b>         | 1 (1%)               | 2 (5%)           | 3 (2%)           |                  |
|                               |              |                          |                                                                                                                                                                                                                                                                                                                                      |                                      |                                                                 |               | <b>Hypertension</b>                    | -                    | -                | -                |                  |
|                               |              |                          |                                                                                                                                                                                                                                                                                                                                      |                                      |                                                                 |               | <b>Cataracts</b>                       | 4 (4%)               | 2 (5%)           | 6 (5%)           |                  |
|                               |              |                          |                                                                                                                                                                                                                                                                                                                                      |                                      |                                                                 |               | <b>Tuberculosis</b>                    | 5 (5%)               | 2 (5%)           | 7 (5%)           |                  |
|                               |              |                          |                                                                                                                                                                                                                                                                                                                                      |                                      |                                                                 |               |                                        | 6 (7%)               | 1 (2%)           | 7 (5%)           |                  |

**Table 2:** Summary of Findings

|             | Findings in the SA population when compared to the specified ethnicity<br>(e.g. SA have the same BMI as WE, but higher HbA1c) |         |         |
|-------------|-------------------------------------------------------------------------------------------------------------------------------|---------|---------|
|             | WE                                                                                                                            | African | Chinese |
| BMI         | →                                                                                                                             | →       |         |
| HbA1c       | ↑                                                                                                                             | ↓       | ↑       |
| SBP         | ↓                                                                                                                             | ↓       |         |
| DBP         | →                                                                                                                             | →       |         |
| HDL         | ↓                                                                                                                             | ↑       | ↓       |
| Total Chol  | →                                                                                                                             | →       | →       |
| Retinopathy | →                                                                                                                             | →       | →       |
| Nephropathy | →                                                                                                                             | ↓       |         |
| Neuropathy  | ↓                                                                                                                             | →       |         |
| CVD         | →                                                                                                                             | →       |         |
| Mortality   | ↑                                                                                                                             |         |         |

## Results

### Comorbidities

#### *Body Mass Index (BMI)*

Six studies explored BMI and general weight measurements as an outcome: three comparing SA with WE only, one comparing with WE and Africans, one comparing with Africans only, and one comparing to Malay and Chinese. The three papers comparing SA to only WE demonstrated no statistically significant difference in BMI<sup>10, 11, 16</sup>. Mehta et al<sup>16</sup> in the UK showed a mean BMI (kg/m<sup>2</sup>) of 27.5 in SA (n=163) compared with 27.4 in WE (n=1169) (p=0.835). Similarities in BMI (kg/m<sup>2</sup>) between SA and WE have previously been reported in two different centres (median BMI 25.6 vs. 25.7 respectively and 30.9 vs. 25 respectively)<sup>10</sup>. The results were not significant due to the small number of participants. Shenoy et al<sup>11</sup> also in the UK showed no statistically significant differences in the rates of overweight or obesity between WE (n=112) and SA (n=38) children with T1DM at any age grouping.

Brabarupan et al<sup>9</sup> in the UK showed no statistically significant difference in BMI (kg/m<sup>2</sup>) in SA (n=39) compared to WE (n=565) and Africans (n=38) (median 25.3 vs. 25.0 vs. 25.7 respectively). Omar et al<sup>14</sup> in South Africa also showed no difference between SA (n=40) and Africans (n=86) in mean % ideal body weight (91 vs. 106 respectively).

Lastly, a study by Ismail et al<sup>13</sup> in Malaysia showed that there was no difference in BMI (kg/m<sup>2</sup>) when comparing SA to Malay and Chinese (mean 22.0 vs. 22.3 vs. 22.0 respectively). However, there were significant differences in waist-hip ratio between the ethnic group males with SA having significantly higher waist-hip ratio compared with Chinese (mean 0.88 vs. 0.84 respectively, p=0.007).

In summary, there are no demonstrable differences in BMI between SA, WE and African ethnic groups with T1DM. However, SA males compared to Chinese males with T1DM had a higher waist-hip ratio.

#### *Glycaemic control*

Seven studies explored glycaemic control as an outcome: three comparing SA with WE only, two comparing with WE and Africans, one comparing to Africans only and one comparing with Malay and Chinese. Mehta et al<sup>16</sup> in the UK, demonstrated higher HbA1c (%) levels in SA (n=163) (mean 9.1%) compared with WE (n=1169) (mean 8.5%) (p<0.001). This is similar to the results from Brabarupan et al<sup>9</sup> in the UK who demonstrate SA (n=39) having higher HbA1c (%) levels (median 8.3) compared to WE (n=565) (median 8.0) but lower than African (n=38) (median 9.1) (p<0.05). Another UK study analysed SA and WE at two different hospitals<sup>10</sup> and demonstrated similar HbA1c (%) (median 9.0 vs. 9.1 respectively and 8.2 vs. 8.6 respectively at the two different hospitals). Shenoy et al in<sup>11</sup> the UK found no significant difference in metabolic control between WE (n=112) and SA (n=38) children (median HbA1c 8.4% v 8.8% respectively). Thomas et al<sup>18</sup> in South Africa also found no statistically significant differences between SA (n=118), WE (n=1247) and Africans (n=117) in HbA1c (%) levels (8.7 vs. 8.2 vs. 9.5 respectively). A study by Asmal et al<sup>12</sup> in South Africa showed that SA (n=38) had similar mean glucose concentrations (mmol/l) to Africans (n=52) (15.80 vs. 14.20 respectively).



1  
2  
3 Ismail et al<sup>13</sup> in Malaysia showed that SA (n=76) have significantly higher HbA1c (%) levels compared  
4 to Chinese (n=91) and Malay (n=102) (mean 9.3 vs. 7.8 vs. 9.0 respectively, p<0.001).

5  
6 In summary, studies suggest SA have higher HbA1c levels compared to WE, Malay and Chinese but  
7 lower than Africans.  
8

### 9 **Blood Pressure**

10  
11 Four studies determined blood pressure/hypertension as an outcome: two comparing SA with WE  
12 only, one comparing with WE and Africans and one comparing to Africans only. The three papers  
13 with a WE group all showed that SA have lower blood pressure than the comparator groups. Mehta  
14 et al<sup>16</sup> in the UK, showed a significantly lower systolic blood pressure in SA (n=163) compared with  
15 WE (n=1169) (mean value 136.4 vs. 141.6 mmHg respectively; p=0.004). However, there was no  
16 difference in diastolic blood pressure between SA (mean 75.4 vs. 75.4 mmHg respectively; p=0.41).  
17 Brabarupan et al<sup>9</sup> in the UK also showed that SA (n=39) compared with WE (n=565) and Africans  
18 (n=38) had a lower systolic blood pressure (median 120 vs. 130 vs. 135 mmHg respectively; p<0.05)  
19 and a lower diastolic blood pressure (median 73 vs. 75 vs. 80 mmHg respectively, p<0.05). We have  
20 previously noted that there was no significant difference in systolic blood pressure (mmHg) between  
21 SA and WE (median 121 vs. 125 respectively and 130 vs. 131.5 respectively in two different centres)  
22 in a UK population<sup>10</sup>. However, we reported that SA (n=59) had a higher diastolic blood pressure  
23 (mmHg) than WE (n=118) (median 86 vs. 82 respectively, p<0.05)<sup>10</sup>. Lastly, Omar et al<sup>19</sup> in South  
24 Africa showed absence of difference between SA (n=41) and Africans (n=92) in the prevalence of  
25 hypertension (5% vs. 4% respectively). The analyses in these studies were not adjusted.  
26  
27  
28  
29  
30

31 In summary, studies suggest SA have lower systolic blood pressure compared with WE and Africans,  
32 but there is no difference in the diastolic blood pressure across these three ethnic groups.  
33

### 34 **Lipid Profile**

35  
36 Five studies examined differences in lipid profiles: two comparing SA to WE only, one comparing to  
37 WE and Africans, one comparing to Africans only and one comparing to Malay and Chinese. A UK  
38 study has previously shown that SA (n=80) have lower levels of HDL (mmol/L) (median 1.3 vs. 1.4  
39 respectively, p<0.05) and higher cholesterol/HDL ratio (median 3.6 vs. 3.2 respectively, p<0.05) than  
40 WE (n=160)<sup>10</sup>. There were no statistically significant differences in the levels of total cholesterol  
41 (mmol/L) in SA compared to WE (median 4.7 vs. 4.6 respectively and 4.45 vs. 4.1 respectively).  
42 Another UK study<sup>9</sup> also showed that SA (n=39) had lower levels of HDL (mmol/L) compared with WE  
43 (n=565) but higher levels than Africans (n=38)(median 1.30 vs. 1.49 vs. 1.25 respectively, p<0.05).  
44 They also demonstrate absence of difference in total cholesterol levels ((mmol/L) between SA, WE  
45 and Africans (median 4.00 vs. 4.50 vs. 4.40 respectively) and triglyceride levels (mmol/L) (median  
46 1.07 vs. 0.93 vs. 0.99 respectively). Mehta et al<sup>16</sup> in the UK also show similar levels of total  
47 cholesterol (mmol/L) in SA (n=163) (mean value 4.6) compared to WE (n=1169) (mean value 4.8)  
48 (p=0.132).  
49  
50  
51  
52

53 Ismail et al<sup>13</sup> in Malaysia demonstrate that SA (n=76) compared with Malay (n=102) and Chinese (91)  
54 had no statistically significant differences in total cholesterol (mmol/L) levels (mean 5.74 vs. 5.58 vs.  
55 5.64 respectively) and LDL cholesterol (mmol/L) levels (mean 3.89 vs. 3.48 vs. 3.52 respectively). SA  
56 had significantly lower HDL cholesterol (mmol/L) compared with Chinese (mean 1.28 vs. 1.57  
57  
58  
59  
60

1  
2  
3 respectively,  $p < 0.01$ ) and significantly higher triglyceride levels (mmol/L) (mean 1.02 vs. 0.82  
4 respectively,  $p < 0.03$ ). Lastly, Asmal et al<sup>12</sup> in South Africa found that SA (n=38) compared to Africans  
5 (n=52) had no statistically significant differences in cholesterol levels (mmol/L) (mean 5.17 vs. 4.78  
6 respectively) and triglyceride levels (mmol/L) (2.81 vs. 2.27 respectively).  
7

8  
9 In summary, SA have lower HDL levels compared to WE and Chinese but higher than Africans. SA  
10 have higher triglyceride levels compared with Chinese. There are no differences in total cholesterol  
11 between SA and WE, African, Malay, or Chinese ethnic groups.  
12

### 13 **Microvascular Disease**

#### 14 ***Retinopathy***

15  
16  
17 Four studies examined retinopathy; one comparing SA with WE only, two comparing to WE and  
18 Africans, and one comparing to Africans only. The most relevant study by Sivaprasad et al<sup>17</sup>  
19 investigated retinopathy in T1DM in the UK cohort consisting of 2,626 WE, 344 Africans and 120 SA.  
20 The mean age in this study was 39.4 +/- 16.3 years. The study found no statistically significant  
21 differences between SA, WE and Africans with T1DM in the age-standardised prevalence of  
22 maculopathy [95% confidence interval] (16.6% [10 – 23.2] vs. 14.1% [12.8-15.4] vs. 13.1% [9.4-16.8]  
23 respectively), clinically significant macular oedema (11.2% [5.4-16.9] vs. 6.5% [5.6-7.4] vs. 10.0%  
24 [6.7-13.3] respectively), sight threatening diabetic retinopathy (17.5% [10.6-24.3] vs. 12.1% [10.9-  
25 13.3] vs. 15.9% [11.8-20.0] respectively) and any diabetic retinopathy (54.0% [44.8-63.2] vs. 55.0%  
26 [53.2-56.9] vs. 42.8% [37.3-48.3] respectively).  
27  
28  
29

30  
31 Thomas et al<sup>18</sup>, in South Africa, reported that SA (n=118) were at increased risk of any diabetic  
32 retinopathy (Odds ratio 2.02 95% CI 1.23-3.29) when compared with WE (n=1,247), after adjustment  
33 for age at diagnosis, sex, duration of diabetes, HbA1c, hypertension, and smoking status. Mehta et  
34 al<sup>16</sup> in the UK showed that SA (n=163) compared to WE (n=1,169) had decreased prevalence of  
35 retinopathy (38.7% vs. 48.0% respectively,  $p = 0.025$ ). Lastly, Omar et al<sup>19</sup>, a South African study,  
36 compared SA (n=41) to Africans (n=92) and were unable to demonstrate a statistically significant  
37 difference in the prevalence of retinopathy (22% vs. 14% respectively).  
38  
39

40 In summary, there is no difference in the prevalence of retinopathy between SA, WE and African  
41 ethnic groups.  
42

#### 43 ***Nephropathy***

44  
45 Five studies explored nephropathy and renal function as an outcome in SA with T1DM: two papers  
46 comparing to WE only, one comparing to WE and Africans, and two papers comparing to Africans  
47 only. The largest study, by Mehta et al<sup>16</sup> in the UK, did not show any differences between SA (n=163)  
48 and WE (n=1,169) in the prevalence of nephropathy (13.5% vs. 10.1% respectively,  $p = 0.184$ ).  
49  
50

51 In another UK study, no statistically significant differences were found between SA (n=80) and WE  
52 (n=160) in creatinine levels ( $\mu\text{mol/L}$ ) (median 76 vs. 78 respectively), albumin/creatinine ratio  
53 (mg/mmol) (median 2.4 vs. 2.5 respectively) and eGFR ( $\text{ml/min/1.73}^2$ ) (median 97.3 vs. 91.2  
54 respectively)<sup>10</sup>. Brabarupan et al<sup>9</sup> in the UK showed no difference in the prevalence of  
55 microalbuminuria (mg/mmol) between SA (n=39) and WE (n=565) (median 1.2 vs. 1.2 respectively),  
56 however, Africans (n=38) had significantly higher levels (median 3.7) ( $p < 0.05$ ). There were two  
57  
58  
59  
60

1  
2  
3 studies in South Africa comparing SA to Africans. The first by Omar et al<sup>19</sup> showed in their cohort of  
4 SA (n=41) and Africans (n=92) there was absence of difference in the prevalence of nephropathy (7%  
5 vs. 3% respectively). Asmal et al<sup>12</sup> also showed no statistically relevant difference between SA (n=38)  
6 and Africans (n=52) in creatinine levels ( $\mu\text{mol/L}$ ) (mean 68.90 vs. 79.40 respectively).  
7

8  
9 In summary, there is no difference in the prevalence of nephropathy or difference in renal function  
10 between SA and WE. However, in one study SA had lower levels of microalbuminuria compared to  
11 Africans.  
12

### 13 **Neuropathy**

14  
15 Three studies included neuropathy as an outcome in SA: one comparing to WE only and two  
16 comparing to Africans only. The most relevant study, Mehta et al<sup>16</sup> in the UK, showed that SA  
17 (n=163) compared to WE (n=1,169) have a lower prevalence of neuropathy (14.7% vs. 27.8%  
18 respectively,  $p<0.001$ ). Omar et al<sup>19</sup> compared SA (n=41) to Africans (n=92) in South Africa  
19 demonstrating no statistically significant differences in the prevalence of peripheral neuropathy  
20 (32% vs. 22% respectively) and autonomic neuropathy (5% vs. 4% respectively). Asmal et al<sup>12</sup> in  
21 South Africa showed increased prevalence of neuropathy in SA (n=38) compared to Africans (n=52)  
22 (19% vs. 4% respectively), however no statistical tests were performed.  
23  
24

25  
26 In summary, SA have lower prevalence of neuropathy than WE. There is no difference noted in the  
27 prevalence of neuropathy between SA and Africans.  
28

### 29 **Macrovascular Disease**

30  
31 Two studies reported cardiovascular outcomes: one comparing to WE only and the other comparing  
32 to Africans only. The largest of these studies, by Mehta et al<sup>16</sup> in the UK, did not show evidence of  
33 difference between SA (n=163) and WE (n=1,169) with T1DM in prevalence of cardiovascular disease  
34 (15.3% vs. 11.3% respectively,  $p=0.133$ ). Sub-analysis also did not reveal a difference between SA  
35 and WE in ischaemic heart disease (12.3% vs. 8.3% respectively,  $p=0.093$ ), peripheral vascular  
36 disease (1.8% vs. 2.7% respectively,  $p=0.79$ ) and cerebrovascular disease (3.7% vs. 1.8% respectively,  
37  $p=0.13$ ). It is important to note that the mean age in the T1DM group was lower (mean age of SA  
38 41.9 years and WE 45.3 years) compared to T2DM (mean age 59.2 years SA and 66.2 years WE)  
39 which may have led to an under-representation of cardiovascular outcomes in the T1DM group.  
40  
41

42  
43 A second study compared peripheral arterial disease between SA and Africans in South Africa. Omar  
44 et al<sup>19</sup> showed that none of their participants in either the SA (n=41) or African group (n=92) had  
45 peripheral vascular disease or ischaemic heart disease. This may also be due to their younger cohort  
46 of patients and small sample size.  
47  
48

49 In summary, the prevalence of cardiovascular disease between the SA, WE and African populations  
50 do not differ.  
51

### 52 **Mortality**

53  
54 Only one study examined the association of SA ethnicity on mortality in people with T1DM.  
55 Swerdlow et al<sup>15</sup> in a UK study investigated mortality of SA patients compared to the non-SA  
56 population, approximately 97% of which were Caucasian. The patients were followed for up to 28  
57  
58  
59  
60

1  
2  
3 years. In their cohort of 424 SA patients there were 27 deaths (6.4%) and in 23,326 non-SA there  
4 were 1,293 deaths (5.5%). Mortality in SA and non-SA with T1DM was calculated independently by  
5 comparing with the general population mortality using Standardized Mortality Ratios (SMR).  
6 Compared to the reference population, the SMR for SA patients were 3.9 (95% CI 2.0-6.9) in men  
7 and 10.1 (6.6-16.6) in women. The SMR for the corresponding non-SA were 2.7 (2.6-2.9) in men and  
8 4.0 (3.6-4.3) in women. No details are provided as to the age of death in these patients. The most  
9 common cause of death in SA patients was cardiovascular disease (29.6%) and renal disease (14.8%).  
10 The 'other' causes of death accounted for 8 deaths (29.6%) and included septicaemia, systemic lupus  
11 erythematosus, bronchopneumonia, unspecified urinary tract infection and congenital  
12 malformation. The most common causes of death in non- SA were cardiovascular disease (n=474,  
13 36.7%) and diabetes and hypoglycaemia (n=239, 18.5%). There was 1 death due to neoplasm in SA  
14 (3.7%) and 89 in non-SA (6.9%).  
15  
16  
17

18 In summary, mortality is higher in SA with T1DM than non-SA when compared to the reference  
19 population in the UK. SA females were in particular affected, with a SMR that was over twice that of  
20 the non-SA female T1DM population. The commonest cause of death was cardiovascular disease.  
21  
22  
23  
24  
25  
26  
27  
28  
29  
30  
31  
32  
33  
34  
35  
36  
37  
38  
39  
40  
41  
42  
43  
44  
45  
46  
47  
48  
49  
50  
51  
52  
53  
54  
55  
56  
57  
58  
59  
60

## **Discussion**

This is the first systematic review to examine the differences in comorbidities, microvascular complications, macrovascular complications and mortality between SA and other ethnic groups with T1DM. In summary (see Table 2), mortality is higher in SA with T1DM when compared to a largely WE reference population. Female SA were in particular affected, with a SMR that was over twice that of the non-SA female T1DM population. The commonest cause of death is cardiovascular disease.

Overall, the studies suggest that cardiovascular disease itself is no more common in SA T1DM compared to WE. The study by Mehta et al<sup>16</sup> that examined cardiovascular disease most clearly, studied a population with a mean age in their early 40s, and is likely to be too young for cardiovascular disease to manifest clinically. Whilst they observed a 50% higher risk of ischaemic heart disease (12.3 vs. 8.3%) and twice the risk of cerebrovascular disease (1.8 vs 3.7%) in SA compared to WE, the study had less than 30% power to detect a statistically significant difference. Some risk factors for cardiovascular disease appear greater in SA, with lower HDL than WE and the Chinese, and higher HbA1c. However, the most powerful risk factor for cardiovascular disease of systolic BP is lower than in WE.

Most studies also suggest SA have higher HbA1c levels than WE<sup>20</sup>, Malay and Chinese but lower than African ethnic groups. Despite this, rates of retinal and nephropathic microvascular disease were the same as the WE population and some (neuropathy) even lower. There is an issue around competing risk however, as SA with T1DM may die at a younger age before developing retinopathy.

Compared to Africans, SA had lower levels of microalbuminuria, lower HbA1c, lower systolic blood pressure and higher HDL levels. There were no statistically significant differences between these two ethnic groups in the remaining complications: cardiovascular disease, retinopathy, and neuropathy. There was also no difference in BMI.

## **Weaknesses**

There are several weaknesses with the analysis. The quality of the studies was poor with most studies being retrospective observational or cross-sectional. It was not possible to undertake a meta-analysis of the combined studies because the results were heterogeneous in nature.

The studies included in the analysis are derived from a large range of years (1981 until 2015), a time period during which diabetes treatment and prevention of complications has changed dramatically. Ideally, the analysis should specifically consider studies which compared the different ethnic groups during the same period of observation with similar standards of therapy to eliminate bias.

Furthermore, we accepted a clinical diagnosis for T1DM in the included studies. Some studies simply relied on coding of T1DM in their clinical systems as inclusion criteria with other studies accepting a younger age of diagnosis (<30/35 years of age) and insulin dependency as their inclusion criteria. As we did not have a standardised criterion for the diagnosis of T1DM for the included studies, it may well be that some patients with juvenile-onset T2DM requiring insulin treatment may have been wrongly coded as having T1DM.

1  
2  
3 Moreover, the papers in our review did not include data on medication use which makes it unclear  
4 whether differences in blood pressure, hbA1c and lipid profiles were primarily due to ethnicity or  
5 because of differences in medication use.  
6

7  
8 Lastly, data from patients with SA ethnicity living in the UK and abroad were pooled. Prevalence of  
9 T2DM is higher in migrant SA compared to native SA thought to be secondary to urbanisation and  
10 lifestyle<sup>21</sup>. It is likely that prevalence and complication rates of T1DM would also be different in  
11 migrant and native SA and therefore grouping them together may cause inaccuracy of reporting of  
12 the results.  
13

### 14 **Strengths**

15  
16 The strengths of this analysis are its comprehensive search strategy with clearly defined population  
17 and outcomes. Our search strategy incorporated both full-length papers as well as abstracts,  
18 included all languages and had a secondary search strategy to ensure we did not miss any relevant  
19 papers. We compared the SA group, the largest ethnic group globally with all other indigenous  
20 ethnic groups.  
21  
22

### 23 **Implications**

24  
25 Our analysis highlights two areas. Firstly, the ethnic disparity in mortality that has previously been  
26 described in T2DM<sup>22</sup> is also present for SA patients with T1DM. This disparity is most likely due to  
27 cardiovascular disease but this association remains to be proven. Given the close association  
28 between glycaemic control with cardiovascular disease and excess mortality in T1D<sup>23</sup>, and the higher  
29 HbA1c in the SA population, the findings of this systematic review call for more aggressive glycaemic  
30 control in the SA T1D population. Previous literature has demonstrated how SA have increased  
31 adiposity in comparison to WE and have advocated lower cut-offs for BMI in SA; BMI > 23 overweight  
32 and BMI > 25 obese<sup>1, 24</sup>. These culturally tailored programmes that have been attempted for T2DM  
33 may also be required for T1DM<sup>25</sup>.  
34  
35  
36

37  
38 In addition, we may require more stringent control of other comorbidities such as hyperlipidaemia  
39 and hypertension<sup>26</sup>, though this needs to be formally addressed. Secondly, we highlight a need for a  
40 large, ideally prospective, multinational study exploring the effect of ethnicity in a uniform  
41 healthcare setting. This will enable consistent methodology, and standardised reporting of  
42 comorbidities and complications such as those mentioned previously, but also complications such as  
43 peripheral vascular disease, depression and bone fractures that have not previously been addressed.  
44  
45  
46  
47  
48  
49  
50  
51  
52  
53  
54  
55  
56  
57  
58  
59  
60



## Figure Legends

**Figure 1:** Flowchart demonstrating Study Selection

**Competing interests:** All authors have completed the ICMJE uniform disclosure form at [www.icmje.org/coi\\_disclosure.pdf](http://www.icmje.org/coi_disclosure.pdf) and declare: no support from any organisation for the submitted work; no financial relationships with any organisations that might have an interest in the submitted work in the previous three years; KK (Co-Chair) PS and PN are members of the South Asian Health Foundation Working group on Diabetes.

**Acknowledgements:** KK acknowledges support from the NIHR Collaboration for Leadership in Applied Health Research and Care East Midlands (CLAHRC-EM) and the NIHR Leicester-Loughborough Biomedical Research Unit.

**Ethics Approval:** Not required

**Funding:** None

All authors had full access to all of the data (including statistical reports and tables) in the study and can take responsibility for the integrity of the data and the accuracy of the data analysis.

The lead author (the manuscript's guarantor) affirms that the manuscript is an honest, accurate, and transparent account of the study being reported; that no important aspects of the study have been omitted; and that any discrepancies from the study as planned have been explained.

**Data sharing:** no additional data available.

I, Komil Sarwar, the Corresponding Author of this article contained within the original manuscript which includes any diagrams & photographs within and any related or stand-alone film submitted (the Contribution") has the right to grant on behalf of all authors and does grant on behalf of all authors, a licence to the BMJ Publishing Group Ltd and its licencees, to permit this Contribution (if accepted) to be published in the BMH and any other BMJ Group products and to exploit all subsidiary rights, as set out in our licence at:[http://www.bmj.com/about-bmj/resources-authors/forms-policies-and-checklists/copyright-open-access-and-permission-reuse.](http://www.bmj.com/about-bmj/resources-authors/forms-policies-and-checklists/copyright-open-access-and-permission-reuse)"

*IF YOU ARE A NATIONAL INSTITUTE OF HEALTH ("NIH") EMPLOYEE, CONTRACTOR OR TRAINEE* the following cover sheet will be accepted by the BMJ Group and NIH and incorporated into the above Licence.

I am one author signing on behalf of all co-owners of the Contribution - YES

### Contributorship Statement

Dr Komil N Sarwar: involvement in the design of the work, data collection, data analysis, writing the paper, drafting and revision of the paper

Dr Phoebe Cliff: involvement in the design of the work, data collection, data analysis, helped with



1  
2  
3 drafting and revision of the paper  
4

5 Dr Ponnusamy Saravanan: involvement in the design of the work, reviewed all drafts of the paper,  
6 helped with revision of the paper  
7

8 Professor Kamlesh Khunti - involvement in the design of the work, reviewed all drafts of the paper,  
9 helped with revision of the paper  
10

11 Dr Krishnarajah Nirantharakumar - responsible for the conception and design of the work, reviewed  
12 all drafts of the paper, helped with revision of the paper  
13

14 Dr Parth Narendran - responsible for the conception and design of the work, reviewed all drafts of  
15 the paper, helped with revision of the paper  
16  
17  
18  
19  
20  
21  
22  
23  
24  
25  
26  
27  
28  
29  
30  
31  
32  
33  
34  
35  
36  
37  
38  
39  
40  
41  
42  
43  
44  
45  
46  
47  
48  
49  
50  
51  
52  
53  
54  
55  
56  
57  
58  
59  
60

## References

1. Misra A, Khurana L. Obesity-related non-communicable diseases: South Asians vs White Caucasians. *International Journal of Obesity*. 2011; 35: 167-187
2. Gholap N, Davies M, Patel K, Sattar N, Khunti K. Type 2 diabetes and cardiovascular disease in South Asians. *Primary Care Diabetes*. 2011;5(1):45-56
3. Department of Health. National Service Framework for Diabetes: Standards. 2001.
4. Tillin T, Hughes A, Mayet J, Whincup P, Sattar N, Forouhi N et al. The Relationship Between Metabolic Risk Factors and Incident Cardiovascular Disease in Europeans, South Asians, and African Caribbeans. *Journal of the American College of Cardiology*. 2013;61(17):1777-1786.
5. Willi S, Miller K, DiMeglio L, Klingensmith G, Simmons J, Tamborlane W et al. Racial-Ethnic Disparities in Management and Outcomes Among Children With Type 1 Diabetes. *PEDIATRICS*. 2015;135(3):424-434.
6. Borschuk A, Everhart R. Health disparities among youth with type 1 diabetes: A systematic review of the current literature. *Families, Systems, & Health*. 2015;33(3):297-313.
7. Office for National Statistics. Ethnicity and national identity in England and Wales 2011. 2012
8. Wells G, Shea B, O'Connell D, Peterson J, Welch V, Losos M, Tugwell P. The Newcastle-Ottawa Scale (NOS) for assessing the quality of nonrandomised studies in meta-analyses. Ottawa Hospital Research Institute
9. Brabarupan T, Misra S, Oliver N. A comparison of type 1 diabetes phenotype in a young multi-ethnic urban population. *European Association for the Study of Diabetes*. Abstract. 2013
10. Sarwar K, Gillani S, Singh B, Saravanan P, Narendran P. A comparison of diabetes type 1 in South Asian and Caucasian patients in the UK: the Type 1 in Minority Ethnic populations (TIME) study. *European Association for the Study of Diabetes*. Abstract. 2015
11. Shenoy S, Waldron S, Cody D, Swift P. Ethnic group differences in overweight and obese

- 1  
2  
3 children with type 1 diabetes mellitus. Archives of Disease in Childhood. 2004;89:1076-1077  
4  
5  
6 12. Asmal A, Jialal I, Leary W, Makhoba P, Omar M, Pillay N, Thandroyen F. Insulin-dependent  
7 diabetes mellitus with early onset in blacks and Indians. South African Medical Journal.  
8 1981;60(3):91-93  
9  
10  
11  
12 13. Ismail I, Nazaimoon W, Mohamad W, Letchuman R, Singaraveloo M, Hew F et al. Ethnicity  
13 and glycaemic control are major determinants of diabetic dyslipidaemia in Malaysia.  
14 Diabetic Medicine. 2001;18(6):501-508.  
15  
16  
17  
18 14. Omar M, Asmal A. Patterns of diabetes mellitus in young Africans and Indians in Natal.  
19 Tropical and Geographical Medicine. 1984;36(2):133-138  
20  
21  
22  
23 15. Swerdlow A, Laing S, dos Santos Silva I, Slater S, Burden A, Botha J et al. Mortality of South  
24 Asian patients with insulin-treated diabetes mellitus in the United Kingdom: a cohort study.  
25 Diabetic Medicine. 2004;21(8):845-851.  
26  
27  
28  
29 16. Mehta R, Davies M, Ali S, Taub N, Stone M, Baker R et al. Association of cardiac and non-  
30 cardiac chronic disease comorbidity on glycaemic control in a multi-ethnic population with  
31 type 1 and type 2 diabetes. Postgraduate Medical Journal. 2011;87(1033):763-768.  
32  
33  
34  
35 17. Sivaprasad S, Gupta B, Gulliford M, Dodhia H, Mohamed M, Nagi D et al. Ethnic Variations in  
36 the Prevalence of Diabetic Retinopathy in People with Diabetes Attending Screening in the  
37 United Kingdom (DRIVE UK). PLoS ONE. 2012;7(3):e32182.  
38  
39  
40  
41 18. Thomas R, Distiller L, Luzio S, Chowdhury S, Melville V, Kramer B et al. Ethnic Differences in  
42 the Prevalence of Diabetic Retinopathy in Persons With Diabetes When First Presenting at a  
43 Diabetes Clinic in South Africa. Diabetes Care. 2012;36(2):336-341.  
44  
45  
46  
47 19. Omar M, Asmal A. Complications of early-onset insulin-dependent diabetes mellitus in  
48 Blacks and Indians. South African Medical Journal. 1984;65(3):75-78  
49  
50  
51  
52 20. Mostafa S, Davies M, Webb D, Srinivasan B, Gray L, Khunti K. Independent effect of ethnicity  
53 on glycemia in South Asians and white Europeans. Diabetes Care. 2012;35(8):1746-8  
54  
55  
56  
57 21. Lind M, Svensson AM, Kosiborod M, Gudbjörnsdottir S, Pivodic A, Wedel H, Dahlqvist  
58 S, Clements M, Rosengren A. Glycemic control and excess mortality in type 1 diabetes. N  
59  
60

1  
2  
3 Engl J Med. 2014 Nov 20;371(21):1972-82  
4  
5

- 6 22. Bellary S, O'Hare JP, Raymond NT, Mughal S, Hanif WM, Jones A, Kumar. Premature  
7 cardiovascular events and mortality in south Asians with type 2 diabetes in the United  
8 Kingdom Asian Diabetes Study – effect of ethnicity on risk. Current medical research and  
9 opinion. 2010; 26 (8): 1873-9  
10  
11  
12  
13 23. Bellary S, O'Hare JP, Raymond NT, Gumber A, Mughal S, Szczepura A, Kumar S, Barnett  
14 AH; UKADS Study Group. Enhanced diabetes care to patients of south Asian ethnic origin  
15 (the United Kingdom Asian Diabetes Study): a cluster randomised controlled trial.  
16 Lancet. 2008;371(9626):1769-76  
17  
18  
19  
20  
21 24. Bodicoat D, Gray L, Henson J, Webb D, Guru A, Misra A, Gupta R, Vikram N, Sattar N, Davies  
22 M, Khunti K. Body mass index and waist circumference cut-points in multi-ethnic  
23 populations from the UK and India: the ADDITION- Leicester, Jaipur heart watch and New  
24 Delhi cross-sectional studies. PLoS One. 2014; 5:9(3) – used  
25  
26  
27  
28  
29 25. Shah A, Kanaya AM. Diabetes and Associated Complications in the South Asian  
30 Population. Current cardiology reports. 2014;16(5):476.  
31  
32  
33 26. UK Prospective Diabetes Study Group. Tight blood pressure control and risk of  
34 macrovascular and microvascular complications in type 2 diabetes: UKPDS 38. BMJ.  
35 1998;317(7160):703-713. - used  
36  
37  
38  
39  
40  
41  
42  
43  
44  
45  
46  
47  
48  
49  
50  
51  
52  
53  
54  
55  
56  
57  
58  
59  
60

1  
2  
3  
4  
5  
6  
7  
8  
9  
10  
11  
12  
13  
14  
15  
16  
17  
18  
19  
20  
21  
22  
23  
24  
25  
26  
27  
28  
29  
30  
31  
32  
33  
34  
35  
36  
37  
38  
39  
40  
41  
42  
43  
44  
45  
46  
47  
48  
49  
50  
51  
52  
53  
54  
55  
56  
57  
58  
59  
60

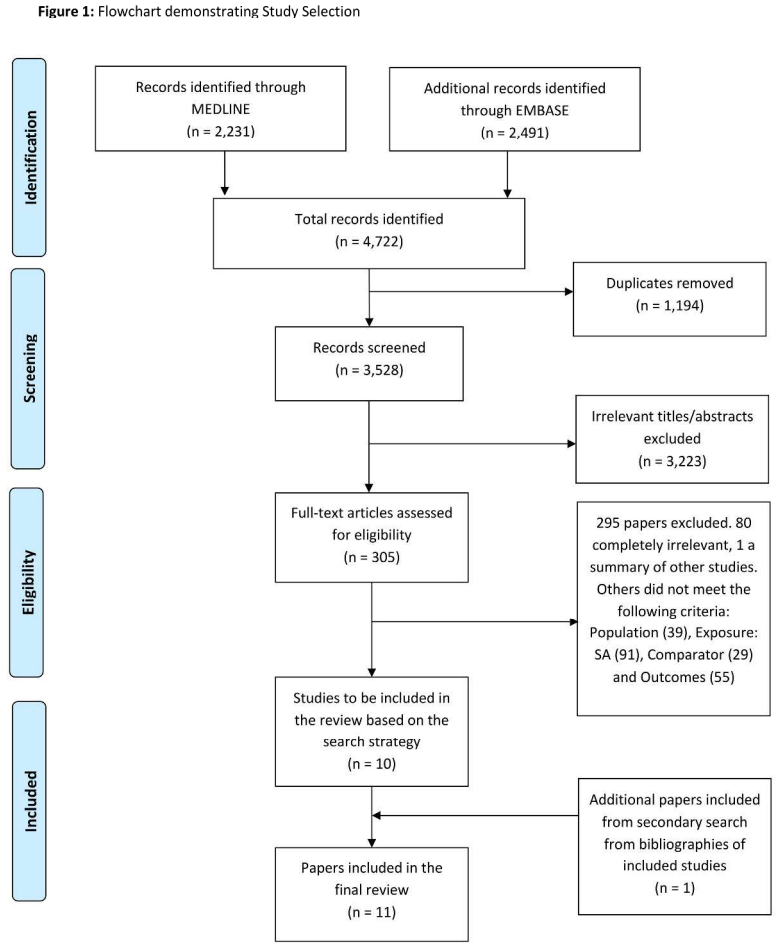

Figure 1: Flowchart demonstrating Study Selection

297x419mm (300 x 300 DPI)

## Appendix 1: Search Strategy

## Embase

|           |                                                                                                      |             |
|-----------|------------------------------------------------------------------------------------------------------|-------------|
| 1         | type 1 diabetes.mp. or exp insulin dependent diabetes/                                               | 95641       |
| 2         | ethnicity.mp. or exp ethnic group/ or exp race/ or exp ethnicity/ or exp "ethnic or racial aspects"/ | 288124      |
| 3         | exp ethnic difference/                                                                               | 27336       |
| 4         | exp South Asian/                                                                                     | 27829       |
| 5         | Sri Lanka.mp. or exp Sri Lanka                                                                       | 7081        |
| 6         | Bangladesh.mp. or exp Bangladesh                                                                     | 13584       |
| 7         | India.mp. or exp India                                                                               | 156225      |
| 8         | Pakistan.mp. or exp Pakistan                                                                         | 22629       |
| 9         | Nepal.mp. or exp Nepal                                                                               | 8792        |
| 10        | Bhutan.mp. or exp Bhutan                                                                             | 507         |
| 11        | maldives.mp. or exp Maldives                                                                         | 268         |
| 12        | 3 or 4 or 5 or 6 or 7 or 8 or 9 or 10 or 11 or 12                                                    | 499040      |
| <b>13</b> | <b>1 and 12</b>                                                                                      | <b>2491</b> |

## Medline

|           |                                                                                    |             |
|-----------|------------------------------------------------------------------------------------|-------------|
| 1         | exp Diabetes mellitus, Type 1/ or type 1<br>diabetes.mp.                           | 72398       |
| 2         | insulin dependent diabetes.mp.                                                     | 19957       |
| 3         | exp ethnic groups/ or ethnicity.mp                                                 | 158001      |
| 4         | ethnic differences.mp.                                                             | 6985        |
| 5         | ethnic aspects.mp.                                                                 | 30          |
| 6         | racial differences.mp.                                                             | 5002        |
| 7         | race.mp.                                                                           | 77099       |
| 8         | racial groups.mp.                                                                  | 2853        |
| 9         | racial aspects.mp.                                                                 | 34          |
| 10        | South Asian*.mp.                                                                   | 3740        |
| 11        | exp sri lanka/ or sri lanka*.mp                                                    | 6443        |
| 12        | exp bangladesh/ or bangladesh*.mp                                                  | 11009       |
| 13        | exp india/ or india*.mp.                                                           | 164014      |
| 14        | exp pakistan/ or pakistan*.mp.                                                     | 17599       |
| 15        | exp nepal/ or nepal*.mp.                                                           | 7799        |
| 16        | exp bhutan/ or bhutan*.mp.                                                         | 468         |
| 17        | maldives.mp.                                                                       | 195         |
| 18        | 1 or 2                                                                             | 82700       |
| 19        | 3 or 4 or 5 or 6 or 7 or 8 or 9 or 10 or 11 or<br>12 or 13 or 14 or 15 or 16 or 17 | 405983      |
| <b>20</b> | <b>18 and 19</b>                                                                   | <b>2231</b> |



## Appendix 2: Quality Assessment

| Study                       | Design                              | Grading of study design                                                | Intervention                 | Recruitment of study participants                                                                                                                                                                                                                                                                                      | Differences at baseline                             | Analytical method                                             | Follow up and measurement bias                                                                                                                                     | Assessment of confounders                                                                                                                                      | Additional notes                                                                                                                                  |
|-----------------------------|-------------------------------------|------------------------------------------------------------------------|------------------------------|------------------------------------------------------------------------------------------------------------------------------------------------------------------------------------------------------------------------------------------------------------------------------------------------------------------------|-----------------------------------------------------|---------------------------------------------------------------|--------------------------------------------------------------------------------------------------------------------------------------------------------------------|----------------------------------------------------------------------------------------------------------------------------------------------------------------|---------------------------------------------------------------------------------------------------------------------------------------------------|
| Brarupan et al <sup>9</sup> | Cross-sectional retrospective study | Selection: 1/5 stars<br>Comparability: 0/2 stars<br>Outcome: 2/3 stars | <b>South Asian Ethnicity</b> | <b>Inclusion Criteria</b><br>Subjects with T1DM diagnosed below 35 years of age from a London diabetes clinic. From white European, Afro-Caribbean or South Asian ancestry.                                                                                                                                            | Not applicable                                      | <b>Type of analysis and power calculation</b><br>Not reported | <b>Outcome</b><br>Same outcome measures in both groups. No methodology given so unclear if bias in the way outcomes measured in both groups.                       | <b>Effect of differences at baseline</b><br>Groups not matched for age and gender.                                                                             | 1. Abstract only so full methodology and results not available<br>2. Groups not matched for age and gender                                        |
| Sarwar et al <sup>10</sup>  | Retrospective case-controlled study | Selection: 0/5 stars<br>Comparability: 2/2 stars<br>Outcome: 2/3 stars | <b>South Asian Ethnicity</b> | <b>Inclusion Criteria</b><br>Patients with T1DM in 2 centres in the West Midlands                                                                                                                                                                                                                                      | Patients matched for age and gender                 | <b>Type of analysis and power calculation</b><br>Not reported | <b>Outcome</b><br>Same outcome measures in both groups. No methodology given so unclear if bias in the way outcomes measured in both groups.                       | <b>Factors not included in the study</b><br>Methodology not given so bias may be introduced with the two centres                                               | 1. Abstract only                                                                                                                                  |
| Shenoy et al <sup>11</sup>  | Retrospective Observational Study   | Selection: 1/5 stars<br>Comparability: 0/2 stars<br>Outcome: 2/3 stars | <b>South Asian Ethnicity</b> | <b>Inclusion Criteria</b><br>Children with T1DM between the ages of 2 and 18 years and who had been diagnosed more than a year ago.                                                                                                                                                                                    | Not reported                                        | <b>Type of analysis and power calculation</b><br>Not reported | <b>Outcome</b><br>Obesity assessed in both groups. No methodology given so unclear if bias in between two groups.                                                  | <b>Effect of differences at baseline</b><br>Possibly multiple characteristics not described                                                                    | 1. No methodology given<br>2. No description of statistical analysis used<br>3. No data on South Asians vs. non-South Asians given in the results |
| Asmal et al <sup>12</sup>   | Cross-sectional study               | Selection: 0/5 stars<br>Comparability: 0/2 stars<br>Outcome: 2/3 stars | <b>South Asian Ethnicity</b> | <b>Inclusion Criteria</b><br>Clinic patients who fulfilled the following criteria: age of diagnosis of diabetes <35 years, development of symptoms +/- ketosis in the absence of insulin therapy, and duration of diabetes of at least 12 months. Patients with known alcoholic pancreatic diabetes were not included. | Current age (2.9 years)<br>Age of onset (3.8 years) | <b>Type of analysis and power calculation</b><br>Not reported | <b>Outcome</b><br>Same outcome measures in 2 groups, however details not given as to when measurements were taken and by whom and if standardised for both groups. | <b>Effect of differences at baseline</b><br>Younger age and age of onset in South Asians may have led to a misrepresentation of biochemical data in this group | 1. No statistical methods were used to compare the two groups                                                                                     |

|                              |                          |                                                                        |                                                                                                                                                                                                       |                                                                                                                                                                                                                                                                                                                         |                                                                     |                                                                                                                                           |                                                                                                                                                                                                                                                                                                                                                                                                   |                                                                                                                                                                                    |                                                                                                                                                                                                                                       |
|------------------------------|--------------------------|------------------------------------------------------------------------|-------------------------------------------------------------------------------------------------------------------------------------------------------------------------------------------------------|-------------------------------------------------------------------------------------------------------------------------------------------------------------------------------------------------------------------------------------------------------------------------------------------------------------------------|---------------------------------------------------------------------|-------------------------------------------------------------------------------------------------------------------------------------------|---------------------------------------------------------------------------------------------------------------------------------------------------------------------------------------------------------------------------------------------------------------------------------------------------------------------------------------------------------------------------------------------------|------------------------------------------------------------------------------------------------------------------------------------------------------------------------------------|---------------------------------------------------------------------------------------------------------------------------------------------------------------------------------------------------------------------------------------|
| Ismail et al <sup>13</sup>   | Cross Sectional study    | Selection: 2/5 stars<br>Comparability: 0/2 stars<br>Outcome: 3/3 stars | <b>South Asian Ethnicity</b><br>Identified by their appearance, language and religion                                                                                                                 | <b>Inclusion Criteria</b><br>T1DM defined as acute symptoms associated with heavy ketonuria (>3+) or ketoacidosis at diagnosis, or continuous treatment with insulin within 1 year of diagnosis. All diagnosed < 40 years                                                                                               | Similar baseline characteristics                                    | <b>Type of analysis</b><br>Documented<br><br><b>Power calculation</b><br>Not reported                                                     | <b>Outcome</b><br>Same outcome measures in 2 groups                                                                                                                                                                                                                                                                                                                                               | <b>Effect of differences at baseline</b><br>No differences                                                                                                                         | 1.Clinic-based and not a population-based study. Those attending hospital may have more severe diabetes.<br>2.Conducted in public hospital where majority of patients cannot afford lipid-lowering therapy.                           |
| Omar et al <sup>14</sup>     | Cross-sectional study    | Selection: 0/5 stars<br>Comparability: 0/2 stars<br>Outcome: 2/3 stars | <b>South Asian Ethnicity</b>                                                                                                                                                                          | <b>Inclusion Criteria</b><br>Patients with onset of IDDM <35 years at King Edward Hospital in Durban. Diagnosis of IDDM based on the criteria recommended by WHO.                                                                                                                                                       | Age at onset (6.5 years)<br>Duration of diabetes (1.6 years)        | <b>Type of analysis and power calculation</b><br>Not reported                                                                             | <b>Outcome</b><br>Same outcome measures in 2 groups, however details not given as to when measurements were taken and by whom and if standardised for both groups.                                                                                                                                                                                                                                | <b>Effect of differences at baseline</b><br>Older age of onset and longer duration of diabetes in South Asians may have led to over-representation of complications in this group. | 1.No statistical methods were used to compare the two groups                                                                                                                                                                          |
| Swerdlow et al <sup>15</sup> | Prospective Cohort Study | Selection: 4/4 stars<br>Comparability: 0/2 stars<br>Outcome: 3/3 stars | <b>South Asian Ethnicity</b><br>Identified by computer algorithm (SANGRA) followed by a clerical check by an individual with expertise in this area. Sensitivity of 89-96% and specificity of 94-98%. | <b>Inclusion Criteria</b><br>Age at diagnosis of diabetes <30 years. Some identified in a national register of childhood cases assembled by the BDA from 1972-1986 and remainder from various geographical registers for parts of the UK during 1972-1993. Ages at diagnosis varied. Total cohort of 23, 752 with T1DM. | Age distributions of person-years were similar between the 2 groups | <b>Type of analysis</b><br>Standardised mortality ratios compared using chi squared test.<br><br><b>Power calculation</b><br>Not reported | <b>Follow up</b><br>Till 31 <sup>st</sup> December 1999, or the date of death, 85 <sup>th</sup> birthday, emigration or other loss of follow up.<br><br><b>Lost to Follow up</b><br>1 South Asian and 151 non South Asians lost to follow up through emigration. 50 non South Asians lost to follow up in other ways.<br><br><b>Outcome</b><br>Mortality assessed in the same way in both groups. | <b>Effect of differences at baseline</b><br>No differences in age distributions. However, differences in comorbidities not reported. May be significant in mortality rates.        | 1. Assumption that people diagnosed <30 years had T1DM and those diagnosed >30 years had T2DM.<br>2. Ethnic makeup of the non- South Asian group not reported (assumed Caucasian).<br>3. Small number of deaths in South Asian group. |
| Mehta et al <sup>16</sup>    | Cross-sectional study    | Selection: 1/5 stars<br>Comparability:                                 | <b>South Asian Ethnicity</b>                                                                                                                                                                          | <b>Inclusion Criteria</b><br>Diabetes patients attending a specialist                                                                                                                                                                                                                                                   | Age (3.4 years)<br>Duration of diabetes (5.9)                       | <b>Type of analysis</b><br>Documented                                                                                                     | <b>Outcome</b><br>Baseline data and comorbidities data collected in the same way in both                                                                                                                                                                                                                                                                                                          | <b>Effect of differences at baseline</b>                                                                                                                                           | 1.Cross sectional design so causation cannot                                                                                                                                                                                          |

|                                |                                   |                                                                        |                                                                                                                                                                           |                                                                                                                                                                                                                                                                        |                                                   |                                                                                       |                                                                                                                                                                                                                                                                                                                                                                            |                                                                                                                                                                                                  |                                                                                                                                                                                                                             |
|--------------------------------|-----------------------------------|------------------------------------------------------------------------|---------------------------------------------------------------------------------------------------------------------------------------------------------------------------|------------------------------------------------------------------------------------------------------------------------------------------------------------------------------------------------------------------------------------------------------------------------|---------------------------------------------------|---------------------------------------------------------------------------------------|----------------------------------------------------------------------------------------------------------------------------------------------------------------------------------------------------------------------------------------------------------------------------------------------------------------------------------------------------------------------------|--------------------------------------------------------------------------------------------------------------------------------------------------------------------------------------------------|-----------------------------------------------------------------------------------------------------------------------------------------------------------------------------------------------------------------------------|
|                                |                                   | lity: 2/2 stars<br>Outcome: 3/3 stars                                  | identified based on that given in the patient's record or by use of name recognition software 'Nam Pechan' supplemented by a visual inspection of surnames and forenames. | outpatient diabetes clinic in Leicestershire, UK, between 2003 and 2005.<br><br>Methodology of patients being classified as T1DM or T2DM not reported.                                                                                                                 | years)<br>Smoking (13.7%)                         | <b>Power calculation</b><br>Not reported                                              | groups. Classification the same in both groups.                                                                                                                                                                                                                                                                                                                            | Younger age of onset and shorter duration of diabetes in South Asians may have led to under-representation of comorbidities in South Asians with T1DM.                                           | be established<br>2.Data from one hospital, not generalizable<br>3.Did not comment on frequency of attendance for blood glucose monitoring so relationship between HbA1c and comorbidity not clear                          |
| Sivaprasad et al <sup>17</sup> | Cross-sectional study             | Selection: 1/5 stars<br>Comparability: 1/2 stars<br>Outcome: 3/3 stars | <b>South Asian Ethnicity</b><br>Self-reported ethnicity recorded at the time of screening according to the codes used in the Census 2001.                                 | <b>Inclusion Criteria</b><br>All subjects in the diabetic screening register of West Yorkshire and South East London programmes were included in this study. Coverage of diabetic people in the respective regions: 95% in West Yorkshire and 81% in South East London | Not reported                                      | <b>Type of analysis</b><br>Documented<br><br><b>Power calculation</b><br>Not reported | <b>Outcome</b><br>Diabetic screening and retinopathy assessment same in both groups.                                                                                                                                                                                                                                                                                       | <b>Effect of differences at baseline</b><br>Possibly multiple considering characteristics not described                                                                                          | 1.Records of patients that were not obtainable or exempt from diabetic screening (12%) did not have ethnicity data so South Asians may have been under-represented<br>2.Did not assess factors like BP, glycaemic control   |
| Thomas et al <sup>18</sup>     | Retrospective observational study | Selection: 1/5 stars<br>Comparability: 2/2 stars<br>Outcome: 3/3 stars | <b>South Asian Ethnicity</b>                                                                                                                                              | <b>Inclusion Criteria</b><br>Subjects classified as having T1DM or T2DM on clinical assessment according to the American Diabetes Association classification of diabetes.                                                                                              | Age (4.1 years)<br>Duration of diabetes (4 years) | <b>Type of analysis</b><br>Documented<br><br><b>Power calculation</b><br>Not reported | <b>Period of study</b><br>2001-2010 with baseline characteristics being obtained at the time of initial presentation.<br><br><b>Outcome</b><br>Same outcome measures in 2 groups but data collected from 2001-2010 so may be discrepancies between people being screened at the beginning and the end of the study.<br><br><b>Drop out or withdrawals</b><br>None reported | <b>Effect of differences at baseline</b><br>Younger age of onset and shorter duration of diabetes in South Asians may have led to under-representation of retinopathy in South Asians with T1DM. | 1.Study carried out in private hospital whereas most of diabetic South Africans use public health system so not generalizable<br>2.Lack of dilation prior to obtaining images may have led to underreporting of retinopathy |
| Omar et al <sup>19</sup>       | Cross sectional study             | Selection: 0/5 stars<br>Comparability:                                 | <b>South Asian Ethnicity</b>                                                                                                                                              | <b>Inclusion Criteria</b><br>Onset of diabetes mellitus <35 years. Classification                                                                                                                                                                                      | Duration of diabetes (1.6 years)                  | <b>Type of analysis</b><br>Documented                                                 | <b>Outcome</b><br>Same outcome measures in 2 groups                                                                                                                                                                                                                                                                                                                        | <b>Effect of differences at baseline</b>                                                                                                                                                         | 1. No outcomes apart from age of onset, duration of                                                                                                                                                                         |

1  
2  
3  
4  
5  
6  
7  
8  
9  
10  
11  
12  
13  
14  
15  
16  
17  
18  
19  
20  
21  
22  
23  
24  
25  
26  
27  
28  
29  
30  
31  
32  
33  
34  
35  
36  
37  
38  
39  
40  
41  
42  
43  
44  
45  
46  
47

|  |  |                                          |  |                                                                                                                                                                                                                                             |  |                                          |  |                                                       |                                                                |
|--|--|------------------------------------------|--|---------------------------------------------------------------------------------------------------------------------------------------------------------------------------------------------------------------------------------------------|--|------------------------------------------|--|-------------------------------------------------------|----------------------------------------------------------------|
|  |  | lity: 0/2 stars<br>Outcome:<br>2/3 stars |  | of IDDM and NIDDM based on the criteria recommended by the National Diabetes Data Group and WHO Expert Committee on Diabetes Mellitus. IDDM patients had always depended on insulin for control of symptoms and prevention of basal ketosis |  | <b>Power calculation</b><br>Not reported |  | Not relevant as this is a purely descriptive analysis | disease and body weight. Limited information provided by study |
|--|--|------------------------------------------|--|---------------------------------------------------------------------------------------------------------------------------------------------------------------------------------------------------------------------------------------------|--|------------------------------------------|--|-------------------------------------------------------|----------------------------------------------------------------|

For peer review only
