# Supplementary material for: Comorbidities, complications and mortality in people of South Asian ethnicity with type 1 diabetes compared with other ethnic groups: a systematic review
Source: PubMed Central journal article supplement — BMJ Open. 2017 Jul 13;7(7):e015005. doi: 10.1136/bmjopen-2016-015005 (PMC5734407; doi:10.1136/bmjopen-2016-015005), 2017-07-13
Supplement: bmjopen-2016-015005supp001.pdf [file bmjopen-2016-015005supp001.pdf]

## Appendix 1: Search Strategy

### Embase

|           |                                                                                                      |             |
|-----------|------------------------------------------------------------------------------------------------------|-------------|
| 1         | type 1 diabetes.mp. or exp insulin dependent diabetes/                                               | 95641       |
| 2         | ethnicity.mp. or exp ethnic group/ or exp race/ or exp ethnicity/ or exp "ethnic or racial aspects"/ | 288124      |
| 3         | exp ethnic difference/                                                                               | 27336       |
| 4         | exp South Asian/                                                                                     | 27829       |
| 5         | Sri Lanka.mp. or exp Sri Lanka                                                                       | 7081        |
| 6         | Bangladesh.mp. or exp Bangladesh                                                                     | 13584       |
| 7         | India.mp. or exp India                                                                               | 156225      |
| 8         | Pakistan.mp. or exp Pakistan                                                                         | 22629       |
| 9         | Nepal.mp. or exp Nepal                                                                               | 8792        |
| 10        | Bhutan.mp. or exp Bhutan                                                                             | 507         |
| 11        | maldives.mp. or exp Maldives                                                                         | 268         |
| 12        | 3 or 4 or 5 or 6 or 7 or 8 or 9 or 10 or 11 or 12                                                    | 499040      |
| <b>13</b> | <b>1 and 12</b>                                                                                      | <b>2491</b> |

## Medline

|           |                                                                                 |             |
|-----------|---------------------------------------------------------------------------------|-------------|
| 1         | exp Diabetes mellitus, Type 1/ or type 1 diabetes.mp.                           | 72398       |
| 2         | insulin dependent diabetes.mp.                                                  | 19957       |
| 3         | exp ethnic groups/ or ethnicity.mp                                              | 158001      |
| 4         | ethnic differences.mp.                                                          | 6985        |
| 5         | ethnic aspects.mp.                                                              | 30          |
| 6         | racial differences.mp.                                                          | 5002        |
| 7         | race.mp.                                                                        | 77099       |
| 8         | racial groups.mp.                                                               | 2853        |
| 9         | racial aspects.mp.                                                              | 34          |
| 10        | South Asian*.mp.                                                                | 3740        |
| 11        | exp sri lanka/ or sri lanka*.mp                                                 | 6443        |
| 12        | exp bangladesh/ or bangladesh*.mp                                               | 11009       |
| 13        | exp india/ or india*.mp.                                                        | 164014      |
| 14        | exp pakistan/ or pakistan*.mp.                                                  | 17599       |
| 15        | exp nepal/ or nepal*.mp.                                                        | 7799        |
| 16        | exp bhutan/ or bhutan*.mp.                                                      | 468         |
| 17        | maldives.mp.                                                                    | 195         |
| 18        | 1 or 2                                                                          | 82700       |
| 19        | 3 or 4 or 5 or 6 or 7 or 8 or 9 or 10 or 11 or 12 or 13 or 14 or 15 or 16 or 17 | 405983      |
| <b>20</b> | <b>18 and 19</b>                                                                | <b>2231</b> |
